# Supplementary material for: Natural variation of OsNPF7.3 regulates alkaline tolerance by modulating ammonium uptake and redistribution in rice
Source: Research Square preprint supplement (doi:10.21203/rs.3.rs-8236504/v1), 2025-12-04
Supplement: Supplementary file 1 [file 42ab248b5ff0daa79d03645c.xlsx]

## Sheet: Supplementary Data 1
Supplementary Data 1. Information of rice accessions and phenotypic data used in GWAS.
ID	Accession name	K5 group in 3K-RG	K9 group in 3K-RG	SAT	SSD	VGI
B007	Tianhandao	Xian/Indica	XI-adm	8.33333	20.4722	2.45667
B009	Vietnam Zaodao	Xian/Indica	XI-1A	4.66667	26.1288	5.59903
B010	Malaihong	Xian/Indica	XI-1A	6	24.9167	4.15278
B012	2037(Rajahamsal)	Xian/Indica	XI-2	5.66667	25.301	4.46488
B017	Aerjituo	Geng/Japonica	GJ-tmp	3.33333	29.1722	8.75167
B021	Seln 244A6-20	Xian/Indica	XI-adm	8.33333	21.9773	2.63727
B029	Dumai	Xian/Indica	XI-1B	6	25.2273	4.20455
B030	Jaibattey	Xian/Indica	XI-adm	3.33333	28.0059	8.40177
B034	Albania Rice	Geng/Japonica	GJ-tmp	3.66667	26.9335	7.3455
B035	American Rice	Xian/Indica	XI-adm	3	28.8399	9.6133
B044	Santiannuo	Xian/Indica	XI-adm	3.33333	28.9273	8.67818
B047	Zhenfu 8	Geng/Japonica	GJ-tmp	7.66667	22.2399	2.90086
B056	Tieganwu	Geng/Japonica	GJ-tmp	5	26.2778	5.25556
B058	Erjiunan 1	Xian/Indica	XI-1B	5.33333	24.6591	4.62358
B060	Aijiaonante	Xian/Indica	XI-1A	6.66667	22.9364	3.44045
B064	indicagzaoindica 7	Xian/Indica	XI-adm	6.66667	23.4276	3.51414
B067	Funingzipijaponicazi	Xian/Indica	XI-1A	9	20.9333	2.32593
B069	Dandongludao	Geng/Japonica	GJ-adm	5.66667	24.1768	4.26649
B071	Muxiqiu	Geng/Japonica	GJ-tmp	4.33333	27.9731	6.45532
B074	Taishannuo	Xian/Indica	XI-1A	9	22.2556	2.47284
B075	Jinbaoyin	Xian/Indica	XI-adm	9	22.8144	2.84551
B076	Minbeiwanindica	Xian/Indica	XI-adm	9	24.2828	2.69809
B077	Yizhiindicag	Geng/Japonica	GJ-tmp	4	27.163	6.79074
B082	Qiyueindica	Xian/Indica	XI-adm	9	21.1843	2.35382
B083	Dongtingwanindica	Xian/Indica	XI-1A	8.33333	22.0278	2.64333
B089	Qitoubaigu3	Xian/Indica	XI-adm	3.66667	27.5926	7.52525
B095	Mowangguneiza	Xian/Indica	XI-adm	6.66667	22.596	3.38939
B103	Laohongdao	Geng/Japonica	GJ-tmp	5.66667	25.2593	4.45752
B105	Baoxuan 21	Xian/Indica	XI-adm	5.33333	26.8889	5.04167
B106	Wenindicagnuo	Xian/Indica	XI-adm	3	30.7061	10.2354
B119	Guangluai 15-	Xian/Indica	XI-1A	5.66667	25.0909	4.42781
B126	Zaoindica 240	Xian/Indica	XI-1A	9	21.9827	2.44252
B131	Aizizhan	Xian/Indica	XI-adm	8.33333	22.5833	2.71
B132	Xiaobaimi	Xian/Indica	XI-adm	9	19.2803	2.14226
B133	Yanshuichi	Xian/Indica	XI-adm	3	33.1742	9.74579
B137	80B	Xian/Indica	XI-adm	8.33333	21.2879	2.55455
B140	Pei C122	Xian/Indica	XI-1A	4.66667	26.4066	5.65855
B150	L 301B	Xian/Indica	XI-1A	4.33333	28.6894	6.62063
B151	Jinnante 43B	Xian/Indica	XI-1A	8.33333	22.2374	2.66848
B152	Zaoshunonghu 6	Geng/Japonica	GJ-tmp	5.33333	24.2417	4.54531
B154	Liming B	Geng/Japonica	GJ-tmp	6	22.7107	3.78512
B155	Baoxie -7B	Xian/Indica	XI-adm	4.33333	26.9556	6.22051
B156	G Zhenshan 97B	Xian/Indica	XI-1A	5	26.1313	5.22626
B157	88B	Xian/Indica	XI-1A	4.66667	24.737	5.30079
B162	Baigedao	Geng/Japonica	GJ-tmp	5	26.1106	5.22212
B165	Haohuangla	Xian/Indica	XI-adm	7	23.0879	3.29827
B166	Jianghuadao	Geng/Japonica	GJ-tmp	8.33333	20.5481	2.46578
B168	Zhuyuan	Geng/Japonica	GJ-tmp	8.33333	21.3056	2.55667
B170	Hongse 90	Geng/Japonica	GJ-tmp	5	24.5185	4.9037
B191	80A60YR71009-1-5	Geng/Japonica	GJ-trp	8.33333	21.3148	2.55778
B196	Taidongludao	Geng/Japonica	GJ-trp	7	24.5253	3.50361
B199	Hongmisandan	Geng/Japonica	GJ-tmp	3	28.9758	9.65859
B203	Biwusheng	Xian/Indica	XI-adm	9	20.6061	2.28956
B207	Aihechi	Xian/Indica	XI-adm	5.66667	26.5222	4.68039
B208	Lucaihao	Xian/Indica	XI-1A	5	24.2576	4.85152
B210	Nanxiongzaoyouzhan	Xian/Indica	XI-1A	7	22.9227	3.27468
B217	Honggu	Xian/Indica	XI-1B	7.33333	22.6288	3.08574
B219	Haolai	Xian/Indica	XI-adm	3.66667	29.3003	7.991
B226	Heimangdao	Geng/Japonica	GJ-tmp	3.66667	29.3303	7.99917
B228	Haobayong 1	Geng/Japonica	GJ-adm	3.66667	26.1288	7.12603
B232	indicagaizao 10hao	Xian/Indica	XI-1B	7.33333	22.3519	3.04798
B233	indicagwanindica 1	Xian/Indica	XI-adm	4	29.3333	7.33333
B235	Zhonghua 8	Geng/Japonica	GJ-tmp	6.33333	24.1259	3.80936
B240	Zhengdao 5	Geng/Japonica	GJ-tmp	3.33333	27.9889	8.39667
B241	Lamujia	Geng/Japonica	GJ-sbtrp	8.33333	21.9924	2.63909
B249	Chaoyangyihao B	Xian/Indica	XI-1A	8.33333	22.6616	2.71939
B250	Annongwanjaponica B	Geng/Japonica	GJ-tmp	8.33333	21.6212	2.59455
B258	Xingguo	Geng/Japonica	GJ-tmp	5	25.2404	5.04808
CX3	BR24	Xian/Indica	XI-1A	3.33333	33.8232	10.147
CX18	Zaoindica 14	Xian/Indica	XI-1A	7	22.787	3.25529
CX54	Linyitangdao	Xian/Indica	XI-adm	4.66667	29.6124	6.34551
CX57	Zhongchao 123	Geng/Japonica	GJ-tmp	4	28.138	7.03451
CX78	M401	Geng/Japonica	GJ-tmp	3	35.6786	11.8929
CX108	Ziri	Admix	admix	2.33333	36.4778	15.6333
CX110	UP15	Basmati	cB (Bas)	2.66667	35.9848	13.4943
CX116	Wudadaozhong	Geng/Japonica	GJ-tmp	4	29.0758	7.26894
CX128	Gajale	Xian/Indica	XI-adm	5	26.0697	5.21394
CX140	Nipponbare	Geng/Japonica	GJ-tmp	4	27.2343	6.80859
CX154	Khao Dawk Mali 105	Xian/Indica	XI-3	4	28.1424	7.03561
CX165	Wuyujaponica 3	Geng/Japonica	GJ-tmp	3	30.5347	10.1782
CX212	Nongken 58	Geng/Japonica	GJ-tmp	5.33333	27.9327	5.23737
CX221	Zhongyouzao 81	Xian/Indica	XI-adm	5	26.4414	5.28828
CX228	Bala	Xian/Indica	XI-adm	6.66667	24.7551	3.71326
CX231	IR52561-UBN-1-1-2	Xian/Indica	XI-adm	3.66667	28.3611	7.73485
CX250	829	Xian/Indica	XI-1B	6.66667	24.8081	3.72121
CX251	Xudao 4	Geng/Japonica	GJ-tmp	5	27.6657	5.53315
CX273	NONA BOKRA	Xian/Indica	XI-adm	4	27.9763	6.99407
CX276	IR8192-200-3-3-1-1	Xian/Indica	XI-1B	6.66667	24.6818	3.70227
CX282	Lijiangxintuanheigu	Geng/Japonica	GJ-adm	5.66667	26.8404	4.73654
CX290	Duo 57	Xian/Indica	XI-1B	9	20.6279	2.29199
CX307	HP121	Geng/Japonica	GJ-adm	7.66667	23.4286	3.0559
CX315	Zidao	Geng/Japonica	GJ-tmp	3.66667	30.553	8.33264
CX329	Jinchuanyihao	Geng/Japonica	GJ-tmp	4.66667	28.5631	6.12067
CX330	Yueguang	Geng/Japonica	GJ-tmp	5	25.75	5.73333
CX350	Wuyujaponica 20	Geng/Japonica	GJ-tmp	6.66667	24.1364	3.62045
CX372	NERICA 2	Geng/Japonica	GJ-trp	9	22.4303	2.49226
IRIS_313-7690	IR 2344-P1 PB-9-3-2B	Xian/Indica	XI-adm	9	21.0152	2.33502
IRIS_313-7736	NONA BOKRA	Xian/Indica	XI-2	1.33333	37.9722	28.4792
IRIS_313-7778	SOMCAU 70 A	Xian/Indica	XI-adm	5	26.1263	5.22525
IRIS_313-8011	VIETNAM1	Geng/Japonica	GJ-sbtrp	6.66667	24.4333	3.665
IRIS_313-8026	GIOVANNI MARCHETTI	Geng/Japonica	GJ-tmp	8.33333	22.2515	2.67018
IRIS_313-8027	ANSEATICO	Geng/Japonica	GJ-adm	8	21.9318	2.74148
IRIS_313-8029	GRITNA	Geng/Japonica	GJ-adm	5	28.8917	5.77833
IRIS_313-8032	PIEMONTE	Geng/Japonica	GJ-tmp	6	24.548	4.09133
IRIS_313-8033	LOMELLINO	Geng/Japonica	GJ-tmp	5.66667	25.0178	4.41491
IRIS_313-8039	LOTO	Geng/Japonica	GJ-tmp	4.66667	27.4129	5.87419
IRIS_313-8048	RONCOLO	Geng/Japonica	GJ-adm	2.66667	28.8636	11.8097
IRIS_313-8049	LORD	Geng/Japonica	GJ-adm	5.33333	25.9818	4.87159
IRIS_313-8050	MIARA	Geng/Japonica	GJ-tmp	9	23.2778	2.58642
IRIS_313-8052	SMERALDO	Geng/Japonica	GJ-tmp	3.33333	29.6616	8.89848
IRIS_313-8053	RUBIDIO	Geng/Japonica	GJ-adm	4.33333	26.5509	6.12714
IRIS_313-8066	GHIBLI	Geng/Japonica	GJ-tmp	5	27.4939	5.49879
IRIS_313-8087	FRANCES	Geng/Japonica	GJ-tmp	7	23.2152	3.31645
IRIS_313-8095	SHSS 53	Geng/Japonica	GJ-tmp	2.33333	34.0051	14.5736
IRIS_313-8096	SR 113	Geng/Japonica	GJ-tmp	4.33333	26.3	6.06923
IRIS_313-8097	ULLAL	Geng/Japonica	GJ-tmp	6.33333	25.6515	4.05024
IRIS_313-8099	FLIPPER	Geng/Japonica	GJ-tmp	5.33333	26.7854	5.02225
IRIS_313-8105	THAIPERLA	Geng/Japonica	GJ-tmp	3	30.0152	10.0051
IRIS_313-8114	FAISCA	Geng/Japonica	GJ-tmp	4.33333	29.6539	6.8432
IRIS_313-8116	HAREM	Geng/Japonica	GJ-adm	4	28.6902	7.17256
IRIS_313-8118	IBO 400	Geng/Japonica	GJ-tmp	3.66667	35.5667	9.7
IRIS_313-8124	OTA	Geng/Japonica	GJ-adm	2.66667	32.8855	12.3321
IRIS_313-8125	PLOVDIV 22	Geng/Japonica	GJ-tmp	4.66667	28.6364	6.13636
IRIS_313-8126	PLOVDIV 24	Geng/Japonica	GJ-tmp	2.33333	31.0028	13.2869
IRIS_313-8127	POLIZESTI 28	Geng/Japonica	GJ-tmp	3.66667	26.2273	8.01405
IRIS_313-8128	PRECOZ 2 F A	Geng/Japonica	GJ-tmp	3	32.6939	10.898
IRIS_313-8129	RODINA	Geng/Japonica	GJ-tmp	3.66667	29.0087	7.91145
IRIS_313-8138	SALOIO	Geng/Japonica	GJ-tmp	2.66667	30.3611	11.3854
IRIS_313-8139	SANDOCA	Geng/Japonica	GJ-adm	2.66667	35.1061	13.1648
IRIS_313-8140	SHANGAI	Geng/Japonica	GJ-tmp	2.66667	29.9909	11.2466
IRIS_313-8141	SELN 244 A6-20	Geng/Japonica	GJ-tmp	2.33333	34.7424	14.8896
IRIS_313-8148	TIMICH 108	Geng/Japonica	GJ-tmp	3.66667	27.9737	7.6292
IRIS_313-8149	TOPAZIO	Geng/Japonica	GJ-tmp	4.33333	29.728	6.86031
IRIS_313-8151	VALTEJO	Geng/Japonica	GJ-tmp	5.66667	26.8754	4.74272
IRIS_313-8155	KULON	Geng/Japonica	GJ-adm	4.33333	34.798	8.0303
IRIS_313-8158	CT 23	Geng/Japonica	GJ-adm	9	20.5884	2.2876
IRIS_313-8162	RPC 12	Geng/Japonica	GJ-tmp	7	23.9293	3.41847
IRIS_313-8195	LUXOR	Geng/Japonica	GJ-adm	4.33333	29.9249	6.90575
IRIS_313-8200	OPALE	Geng/Japonica	GJ-tmp	7.33333	23.5152	3.20661
IRIS_313-8204	S 102	Geng/Japonica	GJ-tmp	7	23.3333	3.33333
IRIS_313-8213	GRAAL	Geng/Japonica	GJ-trp	8.33333	22.3682	2.68418
IRIS_313-8214	MELAS	Geng/Japonica	GJ-adm	4.66667	29	6.21429
IRIS_313-8215	MERLE	Xian/Indica	XI-adm	6.66667	24.7394	3.71091
IRIS_313-8253	KHAO DAWK MALI 105	Xian/Indica	XI-3	8.33333	22.5178	2.70214
IRIS_313-8332	ARC 15091	Xian/Indica	XI-adm	3.66667	31.8359	8.68251
IRIS_313-8383	GENE	Xian/Indica	XI-adm	7	25.2083	3.95794
IRIS_313-8386	ARC 10812	Xian/Indica	XI-adm	4.66667	24.8902	5.94145
IRIS_313-8399	68-2	Geng/Japonica	GJ-tmp	4.33333	29.5697	6.82378
IRIS_313-8405	JIN JUN DAO	Xian/Indica	XI-adm	5	27.8291	5.56582
IRIS_313-8444	M 203	Geng/Japonica	GJ-tmp	3.66667	31.0463	8.46717
IRIS_313-8474	PAH WEAN	Xian/Indica	XI-3	5.66667	24.8384	4.38324
IRIS_313-8519	MANDASHERPO	Geng/Japonica	GJ-sbtrp	5	29.138	5.82761
IRIS_313-8565	YAHNG LEU	Geng/Japonica	GJ-sbtrp	7	21.7278	3.10397
IRIS_313-8571	ES021(STRAW)	Xian/Indica	XI-3	7	23.197	3.31385
IRIS_313-8580	DAM	Geng/Japonica	GJ-sbtrp	5	24.9444	4.98889
IRIS_313-8631	DUDRE	Xian/Indica	XI-2	4.66667	27.049	5.79621
IRIS_313-8637	BALINGMI	Geng/Japonica	GJ-sbtrp	5	26.4414	5.28828
IRIS_313-8660	KOTTEYARAN	Xian/Indica	XI-2	9	18.5648	2.06276
IRIS_313-8674	HAWM KRUA	Xian/Indica	XI-3	9	20.5	2.27778
IRIS_313-8679	JAO LEUANG	Xian/Indica	XI-3	2	39.9722	19.9861
IRIS_313-8793	KHAO THI RATE	Xian/Indica	XI-3	2.66667	29.4747	11.053
IRIS_313-8815	JANA(NAM)	Geng/Japonica	GJ-sbtrp	3	28.4167	9.47222
IRIS_313-8856	S 201	Geng/Japonica	GJ-tmp	4	28.5942	7.14854
IRIS_313-8857	KAMNAM	Geng/Japonica	GJ-sbtrp	9	22.3242	2.48047
IRIS_313-8859	E ZI 96	Xian/Indica	XI-1A	5	25.6111	5.12222
IRIS_313-8889	LU MAO ZHAN	Xian/Indica	XI-adm	4.33333	28.3333	7.28205
IRIS_313-8914	E 2040	Xian/Indica	XI-adm	5.66667	25.8788	4.56684
IRIS_313-8999	ARC 11430 B	Geng/Japonica	GJ-sbtrp	7.66667	23.2449	3.03195
IRIS_313-9039	MUTTU SAMBA	Xian/Indica	XI-2	9	18.7939	2.08822
IRIS_313-9062	MAE MAI LUD NI	Xian/Indica	XI-3	7	26.1944	3.74206
IRIS_313-9081	TAKAO MOCHI	Geng/Japonica	GJ-tmp	4	26.346	6.58649
IRIS_313-9111	XIA-ZHI-BAI	Xian/Indica	XI-1A	8.33333	22.4899	2.69879
IRIS_313-9114	LEUANG 28-1-87	Xian/Indica	XI-adm	3.66667	29.4268	8.02548
IRIS_313-9119	LEUANG YAI 29-12-46	Xian/Indica	XI-3	3.66667	28.2121	7.69421
IRIS_313-9121	KHAO LEUANG RAI	Xian/Indica	XI-2	4.33333	28.3323	6.53823
IRIS_313-9233	CHUNG YI	Geng/Japonica	GJ-tmp	2.33333	31.2	13.3714
IRIS_313-9243	MACAN BINUNDOK	Xian/Indica	XI-adm	4.66667	24.65	5.85
IRIS_313-9281	KHAO KAI	Xian/Indica	XI-3	1.66667	41.4722	24.8833
IRIS_313-9357	HAM 48	Xian/Indica	XI-3	3.33333	30.897	9.26909
IRIS_313-9384	BARIK KUDI	Xian/Indica	XI-2	9	18.7778	2.08642
IRIS_313-9410	CA2914A(SEL2400)/CALO	Geng/Japonica	GJ-tmp	4	29.4607	7.36518
IRIS_313-9424	ARC 5840	Xian/Indica	XI-adm	9	21.5	2.38889
IRIS_313-9427	ARC 18092	Xian/Indica	XI-adm	7	23.2614	3.32305
IRIS_313-9438	7507-137	Geng/Japonica	GJ-tmp	7	25.2694	3.60992
IRIS_313-9463	CI 1600	Geng/Japonica	GJ-tmp	3.33333	31.0581	9.31742
IRIS_313-9516	NCS840	Xian/Indica	XI-2	2	35.2222	17.6111
IRIS_313-9529	DAGPA BARA	Geng/Japonica	GJ-sbtrp	5.66667	24.0783	4.24911
IRIS_313-9533	DUD KUNING	Xian/Indica	XI-3	4.66667	25.0417	6.2131
IRIS_313-9593	ARC 15088	Xian/Indica	XI-adm	5.66667	24.5768	4.33708
IRIS_313-9600	E-LONG MAH	Xian/Indica	XI-adm	3.66667	28.7167	7.83182
IRIS_313-9634	ARC 15873	Xian/Indica	XI-adm	9	18.9056	2.10062
IRIS_313-9709	MAKALIOKA	Xian/Indica	XI-2	9	21.9924	2.4436
IRIS_313-9725	DA DAO TOU	Geng/Japonica	GJ-tmp	5.66667	26.3283	4.64617
IRIS_313-9769	MURASAHITSUTSURI	Geng/Japonica	GJ-tmp	1.66667	33.3704	20.0222
IRIS_313-9811	KOPANCSI KEREK	Geng/Japonica	GJ-tmp	2.66667	35.649	13.3684
IRIS_313-9813	SZANISZLO 2	Geng/Japonica	GJ-tmp	3.33333	32.6861	9.80583
IRIS_313-9838	TEPUKE	Geng/Japonica	GJ-tmp	5.33333	25.3788	4.75852
IRIS_313-9880	SZEGEDI SZAKALLAS 28	Geng/Japonica	GJ-tmp	6	25.763	4.29383
IRIS_313-9884	FUKUSHIMA-MOCHI(GLUT.)	Geng/Japonica	GJ-tmp	2.33333	31.2727	13.4026
IRIS_313-9886	HUK ZO	Geng/Japonica	GJ-tmp	5	25.9192	5.18384
IRIS_313-9891	YONG AN HUK	Geng/Japonica	GJ-tmp	5.33333	25.5083	4.78281
IRIS_313-9964	WIR1951	Geng/Japonica	GJ-tmp	4.33333	30.3855	7.01204
IRIS_313-9989	MELEKE	Xian/Indica	XI-3	8.33333	23.7096	2.84515
IRIS_313-10010	LALKA(LAL DHAN)	Xian/Indica	XI-2	7.66667	23.7323	3.09552
IRIS_313-10035	RIZ TYPE SORGHO	Xian/Indica	XI-2	4	26.0051	6.50126
IRIS_313-10048	MOVE(MOKOLE)	Xian/Indica	XI-adm	5	29.7235	5.9447
IRIS_313-10057	CHUGOKU 68 HEN	Geng/Japonica	GJ-tmp	4	28.0202	7.00505
IRIS_313-10059	DACHEONGBYEO	Geng/Japonica	GJ-tmp	5	26.9727	5.39455
IRIS_313-10062	REA	Geng/Japonica	GJ-trp	6.66667	22.4962	3.77689
IRIS_313-10084	SENIA	Geng/Japonica	GJ-tmp	1.66667	31.8919	19.1352
IRIS_313-10089	KALIN	Geng/Japonica	GJ-tmp	2.66667	30.5623	11.4609
IRIS_313-10092	CHALBYEO	Geng/Japonica	GJ-tmp	4.66667	27.7222	5.94048
IRIS_313-10096	JOKJEBICHAL	Geng/Japonica	GJ-adm	1.66667	33.1394	19.8836
IRIS_313-10103	DALSUNG 41	Xian/Indica	XI-adm	6.66667	24.1944	3.62917
IRIS_313-10111	MOLO	Geng/Japonica	GJ-adm	9	24.1881	2.68757
IRIS_313-10119	GITANO	Geng/Japonica	GJ-adm	4.66667	33.0216	7.07607
IRIS_313-10154	HE-GU-TSAO	Xian/Indica	XI-1A	9	22.8241	2.53601
IRIS_313-10168	MEI FENG 9	Xian/Indica	XI-adm	4	27	6.75
IRIS_313-10171	YA NONG ZAO 4	Xian/Indica	XI-1A	6.33333	23.9545	3.7823
IRIS_313-10178	GAO JIAO BAI	Xian/Indica	XI-1A	2.66667	39.375	13.7083
IRIS_313-10179	GUI HUA ZAO	Xian/Indica	XI-adm	4.33333	32.1667	7.42308
IRIS_313-10221	BA BAI GU	Xian/Indica	XI-adm	8.33333	23.4354	2.81224
IRIS_313-10226	TONG GU HONG	Xian/Indica	XI-adm	3.33333	35.9192	10.7758
IRIS_313-10239	LIU XU	Xian/Indica	XI-adm	3.66667	31.437	8.57374
IRIS_313-10337	B 6149 F-MR-7	Xian/Indica	XI-adm	5.33333	26.7576	5.01705
IRIS_313-10400	IRGA 370-38-1-1F-C4-2	Xian/Indica	XI-1B	8.33333	21.6768	2.60121
IRIS_313-10404	K 479-2-3	Xian/Indica	XI-adm	9	18.0278	2.00309
IRIS_313-10421	WAR 72-2-1-1	Xian/Indica	XI-adm	9	18.9444	2.10494
IRIS_313-10437	NORIN 21	Geng/Japonica	GJ-tmp	9	21.4924	2.38805
IRIS_313-10458	P168	Xian/Indica	XI-1A	9	24.3737	2.70819
IRIS_313-10477	RUSTY LATE	Xian/Indica	XI-adm	3	28.3611	9.4537
IRIS_313-10484	PILIT (7480) SELN (CI 12007)	Xian/Indica	XI-1A	4.66667	27.596	5.91342
IRIS_313-10511	MACAN SAPAC	Xian/Indica	XI-3	5	23.4848	4.69697
IRIS_313-10513	LUBANG PUTI	Xian/Indica	XI-adm	3.33333	28.747	8.62409
IRIS_313-10542	BELLO	Xian/Indica	XI-2	5.66667	27.4121	4.83743
IRIS_313-10561	NAN-TEO 14	Xian/Indica	XI-1A	6.33333	23.9778	3.78596
IRIS_313-10563	SHA-TIAO-TSAO	Geng/Japonica	GJ-tmp	3.33333	30.7909	9.23727
IRIS_313-10567	AIKAWA 44	Geng/Japonica	GJ-tmp	7.66667	23.1056	3.01377
IRIS_313-10569	BEN-KEI	Geng/Japonica	GJ-tmp	6	25.4894	4.24823
IRIS_313-10577	IFUGAO RICE	Geng/Japonica	GJ-trp	6	23.3795	3.89659
IRIS_313-10618	CHINES	Geng/Japonica	GJ-tmp	4	29.6056	7.40139
IRIS_313-10651	Phou sao leum nyang	Xian/Indica	XI-adm	4.33333	34.3455	6.96224
IRIS_313-10655	Ea houm	Xian/Indica	XI-adm	9	17.7921	1.9769
IRIS_313-10659	LONG MA	Xian/Indica	XI-3	5	25.0894	5.01788
IRIS_313-10660	Lep hed	Geng/Japonica	GJ-sbtrp	8.33333	22.1444	2.65733
IRIS_313-10884	ARC 12493	Geng/Japonica	GJ-sbtrp	7.33333	22.9788	3.13347
IRIS_313-10904	KREM KRAHAM	Xian/Indica	XI-3	8	21.0035	2.62544
IRIS_313-10915	PHCAR SLA KI	Xian/Indica	XI-3	5	24.6843	4.93687
IRIS_313-10932	CHINA 1039 MUTANT(DWARF)	Xian/Indica	XI-1A	5	23.4937	4.69874
IRIS_313-10978	PANI TORONG	Xian/Indica	XI-adm	6.33333	22.5758	4.24482
IRIS_313-11044	BUKU	Geng/Japonica	GJ-trp	6	24.9753	4.16254
IRIS_313-11076	Lai nok kha	Xian/Indica	XI-3	5.66667	25.9735	4.58356
IRIS_313-11080	Phae meun lan	Xian/Indica	XI-3	9	20.1566	2.23962
IRIS_313-11090	Keo lai	Xian/Indica	XI-3	9	22.4747	2.49719
IRIS_313-11095	Mak ea nam	Xian/Indica	XI-3	7	23.3333	3.33333
IRIS_313-11112	HIJOL DIGA	Aus	cA (Aus)	9	20.3889	2.26543
IRIS_313-11133	LWANKHAN	Xian/Indica	XI-3	9	22.1187	2.45763
IRIS_313-11137	NGALONGYI	Xian/Indica	XI-adm	3	33.5	9.9899
IRIS_313-11144	TAUNGDI	Xian/Indica	XI-adm	9	19.1667	2.12963
IRIS_313-11151	E 21	Xian/Indica	XI-3	5.33333	28.2222	5.29167
IRIS_313-11195	KHAW KAR 13	Geng/Japonica	GJ-sbtrp	4.66667	24.7273	5.2987
IRIS_313-11303	ARC 15097	Xian/Indica	XI-adm	9	22.25	2.47222
IRIS_313-11309	ARC 15862	Xian/Indica	XI-adm	4.66667	26.0081	5.57316
IRIS_313-11327	JAO' HAWN MAE JAN	Xian/Indica	XI-3	5	26.6667	5.33333
IRIS_313-11359	DAHARNAGRA	Xian/Indica	XI-2	4.66667	27.1231	5.8121
IRIS_313-11446	NAPDAI	Xian/Indica	XI-2	9	21.1237	2.34708
IRIS_313-11447	TUNAGANNAPNANG	Xian/Indica	XI-adm	5.66667	26.8758	4.74278
IRIS_313-11478	LOCAL	Xian/Indica	XI-2	5	26.8889	4.74519
IRIS_313-11508	PAWNG AEW 1	Xian/Indica	XI-3	4.66667	29.9636	6.42078
IRIS_313-11521	TAN NONG	Xian/Indica	XI-adm	3.33333	32.1273	9.63818
IRIS_313-11522	XINTUAN HEI GU	Geng/Japonica	GJ-adm	4.66667	29.1189	6.23977
IRIS_313-11580	TAI ZHOU indica	Xian/Indica	XI-adm	4.66667	28.3889	6.08333
IRIS_313-11582	WAN japonica BAI DAO TOU	Geng/Japonica	GJ-tmp	3	28.4874	9.49579
IRIS_313-11600	KOTODESHI	Xian/Indica	XI-2	3	25	8.33333
IRIS_313-11609	MAE HAWM	Xian/Indica	XI-3	5	27.2386	5.44773
IRIS_313-11672	RAI MANULA	Geng/Japonica	GJ-tmp	6.66667	23.6389	3.54583
IRIS_313-11682	MA EUE	Xian/Indica	XI-3	9	20.5417	2.60802
IRIS_313-11729	MEI LIU ZAO 5	Xian/Indica	XI-adm	5.66667	25.5202	4.50357
IRIS_313-11785	MOSHI	Xian/Indica	XI-3	7	24.5758	3.51082
IRIS_313-11872	TIE ZHONG	Xian/Indica	XI-1A	4	33.8939	7.77862
IRIS_313-11894	LOC TRANG MUON	Xian/Indica	XI-adm	8.33333	22.3636	2.68364
IRIS_313-11897	PHIT CHZK	Geng/Japonica	GJ-sbtrp	5.66667	23.1722	4.08922
IRIS_313-11899	MAHA CHAI	Xian/Indica	XI-adm	8.33333	21.3833	2.566
IRIS_313-11918	DILBAKSH	Xian/Indica	XI-2	9	20.7475	2.30527
IRIS_313-11926	SI NAM PUENG	Geng/Japonica	GJ-sbtrp	5	25.9975	5.19949
IRIS_313-11967	TANG DU GU	Xian/Indica	XI-adm	9	21.3015	2.36684
IRIS_313-12011	YU TOU ZHONG	Xian/Indica	XI-adm	8.33333	20.5481	2.46578
IRIS_313-12050	SHAN KAUK HNYIN	Xian/Indica	XI-adm	3	29.1515	9.71717
IRIS_313-12093	KARUEL	Xian/Indica	XI-adm	6.66667	20.8889	3.13333
IRIS_313-12182	NYAULI	Xian/Indica	XI-adm	5.66667	29.0556	4.66964
IRIS_313-12186	BAO DAM	Xian/Indica	XI-adm	6	24.6061	4.10101
IRIS_313-12207	SALA	Xian/Indica	XI-adm	2.66667	35.2424	13.2159
IRIS_313-12217	WEONJU 8	Geng/Japonica	GJ-tmp	4.33333	26.3704	6.08547
IRIS_313-12222	Lam Boun	Xian/Indica	XI-3	9	18.1535	2.01706
IRIS_313-12242	Khao Khot	Geng/Japonica	GJ-sbtrp	6.66667	21.9337	3.29005
IRIS_313-12247	DAMNOEUB KRAMOUM	Xian/Indica	XI-3	8.33333	22.1485	2.65782
IRIS_313-12249	DAMNOUEB PHDAU PEN	Xian/Indica	XI-3	9	17.5051	1.94501
IRIS_313-12254	BAN BONG	Geng/Japonica	GJ-sbtrp	6.66667	23.6246	3.54369
IRIS_313-12257	DENG PEE	Geng/Japonica	GJ-sbtrp	9	21.8561	2.42845
IRIS_313-12266	KAUK PAHLING	Geng/Japonica	GJ-sbtrp	8.33333	20	2.4
IRIS_313-12286	EKAYIN SAW	Xian/Indica	XI-3	4.33333	31.9855	7.38127
IRIS_313-12296	SABALINE	Xian/Indica	XI-3	6	25.703	4.28384
IRIS_313-12301	Ngon	Xian/Indica	XI-adm	8.33333	22.0854	2.65024
IRIS_313-12305	Pa kheng khaw	Xian/Indica	XI-3	4.66667	26.0697	5.58636
IRIS_313-12329	CHAO DO	Xian/Indica	XI-adm	9	18.9874	2.10971
IRIS_313-15904	JINBUBYEO	Geng/Japonica	GJ-tmp	4.66667	24.5833	5.26786

## Sheet: Supplementary Data 2
Supplementary Data 2. List of SNPs associated with alkalinity toxicity (SAT), seedling survival days (SSD), and vegetative index (VGI) identified by GWAS.
Trait	SNP	Chr.	Position (bp)	P-value	Annotation	MSU v7.0 ID
SAT	rs1_28314738	1	28314738	1.99302e-06	intron_variant	LOC_Os01g49250
	rs1_28314976	1	28314976	1.04967e-06	intron_variant	LOC_Os01g49250
	rs1_28315393	1	28315393	1.5023e-06	intron_variant	LOC_Os01g49250
	rs1_28315762	1	28315762	1.53342e-06	intron_variant	LOC_Os01g49250
	rs1_28334602	1	28334602	1.86256e-06	intergenic_region	LOC_Os01g49290-LOC_Os01g49300
	rs1_28342694	1	28342694	1.68932e-07	intergenic_region	LOC_Os01g49300-LOC_Os01g49310
	rs7_20704389	7	20704389	2.24369e-06	3_prime_UTR_variant	LOC_Os07g34529
	rs10_1545534	10	1545534	1.58214e-06	intron_variant	LOC_Os10g03570
	rs11_376743	11	376743	1.0824e-06	intron_variant	LOC_Os11g01690
SSD	rs1_28290638	1	28290638	6.88e-07	intergenic_region	LOC_Os01g49210-LOC_Os01g49219
	rs1_28293072	1	28293072	1.35e-06	intergenic_region	LOC_Os01g49210-LOC_Os01g49219
	rs1_28297858	1	28297858	1.87e-06	intron_variant	LOC_Os01g49219
	rs1_28300404	1	28300404	6.07e-07	intergenic_region	LOC_Os01g49219-LOC_Os01g49230
	rs1_28301856	1	28301856	1.75e-06	intergenic_region	LOC_Os01g49219-LOC_Os01g49230
	rs1_28303116	1	28303116	2.26e-07	Promoter_upstream_gene_variant	LOC_Os01g49230
	rs1_28304862	1	28304862	2.4e-06	intergenic_region	LOC_Os01g49230-LOC_Os01g49240
	rs1_28307324	1	28307324	2.17e-06	Promoter_upstream_gene_variant	LOC_Os01g49240
	rs1_28315393	1	28315393	1.51e-06	intron_variant	LOC_Os01g49250
	rs1_28315645	1	28315645	2.13e-06	intron_variant	LOC_Os01g49250
	rs1_28315762	1	28315762	2.32e-06	intron_variant	LOC_Os01g49250
	rs1_28329898	1	28329898	1.02e-06	Promoter_upstream_gene_variant	LOC_Os01g49290
	rs1_28330069	1	28330069	2.36e-06	Promoter_upstream_gene_variant	LOC_Os01g49290
	rs1_28334602	1	28334602	4.44e-08	intergenic_region	LOC_Os01g49290-LOC_Os01g49300
	rs1_28334738	1	28334738	3.99e-07	intergenic_region	LOC_Os01g49290-LOC_Os01g49300
	rs1_28342611	1	28342611	1.98e-06	intergenic_region	LOC_Os01g49300-LOC_Os01g49310
	rs1_28342694	1	28342694	8.88e-08	intergenic_region	LOC_Os01g49300-LOC_Os01g49310
	rs1_30432090	1	30432090	1.23e-06	intergenic_region	LOC_Os01g52920-LOC_Os01g52930
	rs2_34277849	2	34277849	1.32e-06	intergenic_region	LOC_Os02g56010-LOC_Os02g56014
	rs4_30118095	4	30118095	9.32e-08	intergenic_region	LOC_Os04g50890-LOC_Os04g50910
	rs4_30150432	4	30150432	1.97e-06	intergenic_region	LOC_Os04g50930-LOC_Os04g50940
	rs5_24802924	5	24802924	3.58e-07	intergenic_region	LOC_Os05g42370-LOC_Os05g42380
	rs10_20562066	10	20562066	1.42e-06	intergenic_region	LOC_Os10g38489-LOC_Os10g38510
	rs11_17462961	11	17462961	2.91e-07	intron_variant	LOC_Os11g30020
VGI	rs1_28334602	1	28334602	1.42e-06	intergenic_region	LOC_Os01g49290-LOC_Os01g49300
	rs1_28342694	1	28342694	9.8e-07	intergenic_region	LOC_Os01g49300-LOC_Os01g49310
	rs1_3196268	1	3196268	1.98e-06	intergenic_region	LOC_Os01g06740-LOC_Os01g06750
	rs1_3196269	1	3196269	5.68e-07	intergenic_region	LOC_Os01g06740-LOC_Os01g06750
	rs1_3196275	1	3196275	1.63e-06	intergenic_region	LOC_Os01g06740-LOC_Os01g06750
	rs1_3196278	1	3196278	2.16e-06	intergenic_region	LOC_Os01g06740-LOC_Os01g06750
	rs1_36638004	1	36638004	4.39e-07	intergenic_region	LOC_Os01g63200-LOC_Os01g63210
	rs2_34216203	2	34216203	5.48e-07	intergenic_region	LOC_Os02g55890-LOC_Os02g55900
	rs2_34228991	2	34228991	3.37e-08	intergenic_region	LOC_Os02g55910-LOC_Os02g55920
	rs2_34229198	2	34229198	1.35e-07	intergenic_region	LOC_Os02g55910-LOC_Os02g55920
	rs2_34229908	2	34229908	5.82e-07	intergenic_region	LOC_Os02g55910-LOC_Os02g55920
	rs2_34234335	2	34234335	1.29e-06	intergenic_region	LOC_Os02g55920-LOC_Os02g55930
	rs2_34235467	2	34235467	1.53e-06	intergenic_region	LOC_Os02g55920-LOC_Os02g55930
	rs2_34235864	2	34235864	2.4e-07	intergenic_region	LOC_Os02g55920-LOC_Os02g55930
	rs2_34235868	2	34235868	1.59e-07	intergenic_region	LOC_Os02g55920-LOC_Os02g55930
	rs2_34236267	2	34236267	1.7e-06	intergenic_region	LOC_Os02g55920-LOC_Os02g55930
	rs2_34237287	2	34237287	5.02e-07	intergenic_region	LOC_Os02g55920-LOC_Os02g55930
	rs2_34240944	2	34240944	1.89e-06	intron_variant	LOC_Os02g55940
	rs2_34243457	2	34243457	1.23e-06	intron_variant	LOC_Os02g55950
	rs2_34246064	2	34246064	4.57e-07	intron_variant	LOC_Os02g55950
	rs2_34248643	2	34248643	6.8e-08	intron_variant	LOC_Os02g55950
	rs2_34248662	2	34248662	2.26e-06	intron_variant	LOC_Os02g55950
	rs2_34277849	2	34277849	1.57e-06	intergenic_region	LOC_Os02g56010-LOC_Os02g56014
	rs3_9863242	3	9863242	2.44e-06	Promoter_upstream_gene_variant	LOC_Os03g17730
	rs3_9994802	3	9994802	1.81e-06	Promoter_upstream_gene_variant	LOC_Os03g17950
	rs4_30105499	4	30105499	2.78e-07	intergenic_region	LOC_Os04g50870-LOC_Os04g50880
	rs4_30105512	4	30105512	1.32e-06	intergenic_region	LOC_Os04g50870-LOC_Os04g50880
	rs4_30106823	4	30106823	1.13e-06	intergenic_region	LOC_Os04g50870-LOC_Os04g50880
	rs4_30108311	4	30108311	6.49e-08	intron_variant	LOC_Os04g50880
	rs4_30114270	4	30114270	8.81e-07	Promoter_upstream_gene_variant	LOC_Os04g50890
	rs4_30118095	4	30118095	9.7e-10	intergenic_region	LOC_Os04g50890-LOC_Os04g50910
	rs4_30123500	4	30123500	1.43e-07	intergenic_region	LOC_Os04g50910-LOC_Os04g50920
	rs4_30123572	4	30123572	2.29e-06	intergenic_region	LOC_Os04g50910-LOC_Os04g50920
	rs4_30124831	4	30124831	1.98e-06	intergenic_region	LOC_Os04g50910-LOC_Os04g50920
	rs4_30150432	4	30150432	1.01e-07	intergenic_region	LOC_Os04g50930-LOC_Os04g50940
	rs4_30150801	4	30150801	2.05e-06	intergenic_region	LOC_Os04g50930-LOC_Os04g50940
	rs4_30150957	4	30150957	8.7e-07	intergenic_region	LOC_Os04g50930-LOC_Os04g50940
	rs4_30159135	4	30159135	1.02e-06	3_prime_UTR_variant	LOC_Os04g50940
	rs4_30160622	4	30160622	1.84e-06	Promoter_upstream_gene_variant	LOC_Os04g50950
	rs4_30161330	4	30161330	2.29e-06	Promoter_upstream_gene_variant	LOC_Os04g50950
	rs4_30165974	4	30165974	4.88e-08	intergenic_region	LOC_Os04g50950-LOC_Os04g50960
	rs4_30166162	4	30166162	9.46e-07	intergenic_region	LOC_Os04g50950-LOC_Os04g50960
	rs4_30166196	4	30166196	2.15e-07	intergenic_region	LOC_Os04g50950-LOC_Os04g50960
	rs4_30172506	4	30172506	6.92e-07	synonymous_variant	LOC_Os04g50970
	rs4_30172507	4	30172507	2.96e-07	missense_variant	LOC_Os04g50970
	rs4_30176044	4	30176044	1.33e-06	intergenic_region	LOC_Os04g50970-LOC_Os04g50980
	rs4_30179215	4	30179215	2.88e-07	intergenic_region	LOC_Os04g50980-LOC_Os04g50990
	rs4_30179533	4	30179533	1.54e-06	Promoter_upstream_gene_variant	LOC_Os04g50990
	rs4_30180140	4	30180140	1.55e-06	Promoter_upstream_gene_variant	LOC_Os04g50990
	rs4_30187644	4	30187644	6.9e-07	intergenic_region	LOC_Os04g51000-LOC_Os04g51009
	rs4_30187658	4	30187658	7.04e-07	intergenic_region	LOC_Os04g51000-LOC_Os04g51009
	rs4_30187720	4	30187720	2.66e-07	intergenic_region	LOC_Os04g51000-LOC_Os04g51009
	rs4_30187753	4	30187753	1.43e-07	intergenic_region	LOC_Os04g51000-LOC_Os04g51009
	rs4_30187879	4	30187879	5.75e-07	intergenic_region	LOC_Os04g51000-LOC_Os04g51009
	rs4_30187936	4	30187936	6.12e-07	intergenic_region	LOC_Os04g51000-LOC_Os04g51009
	rs4_30190391	4	30190391	1.84e-06	intergenic_region	LOC_Os04g51000-LOC_Os04g51009
	rs4_30190687	4	30190687	1.2e-06	intergenic_region	LOC_Os04g51000-LOC_Os04g51009
	rs4_30190701	4	30190701	2.08e-06	intergenic_region	LOC_Os04g51000-LOC_Os04g51009
	rs4_30190715	4	30190715	8.4e-07	intergenic_region	LOC_Os04g51000-LOC_Os04g51009
	rs4_30190719	4	30190719	1.61e-07	intergenic_region	LOC_Os04g51000-LOC_Os04g51009
	rs4_30191252	4	30191252	1.3e-06	intergenic_region	LOC_Os04g51000-LOC_Os04g51009
	rs4_30201483	4	30201483	1.53e-07	Promoter_upstream_gene_variant	LOC_Os04g51009
	rs4_30208213	4	30208213	1.29e-06	Promoter_upstream_gene_variant	LOC_Os04g51030
	rs4_30208553	4	30208553	1.32e-06	Promoter_upstream_gene_variant	LOC_Os04g51030
	rs4_30210035	4	30210035	1.98e-06	missense_variant	LOC_Os04g51030
	rs4_30210281	4	30210281	2e-06	intron_variant	LOC_Os04g51030
	rs4_30210965	4	30210965	1.24e-06	intron_variant	LOC_Os04g51030
	rs4_30213286	4	30213286	1.76e-06	synonymous_variant	LOC_Os04g51030
	rs4_30214787	4	30214787	1.83e-06	intergenic_region	LOC_Os04g51030-LOC_Os04g51040
	rs5_7785775	5	7785775	9.23e-07	intergenic_region	LOC_Os05g13980-LOC_Os05g13990
	rs5_7785791	5	7785791	2.98e-07	intergenic_region	LOC_Os05g13980-LOC_Os05g13990
	rs5_7939669	5	7939669	6.46e-07	intergenic_region	LOC_Os05g14170-LOC_Os05g14180
	rs11_17462961	11	17462961	7.49e-07	intron_variant	LOC_Os11g30020

## Sheet: Supplementary Data 3
Supplementary Data 3. Genome-wide significant loci associated with SAT, SSD and VGI.
Locus	Lead SNP				Block interval		Number of associated SNPs	Trait
	SNP ID	Chr.	Position (bp)	P-value	Start (bp)	End (bp)
qAT1.1	rs1_3196269	1	3196269	5.68e-07	3196275	3198436	2	VGI
qAT1.2	rs1_28314738	1	28314738	1.99302e-06	28307333	28320149	4	SAT
qAT1.3	rs1_28334602	1	28334602	4.44e-08	28333975	28334712	1	SSD
qAT1.4	rs1_28342694	1	28342694	9.8e-07	28342611	28342694	1	VGI
qAT1.5	rs1_36638004	1	36638004	4.39e-07	36557947	36732609	1	VGI
qAT2.1	rs2_34228991	2	34228991	3.37e-08	34228959	34250700	14	VGI
qAT2.2	rs2_34277849	2	34277849	1.32e-06	34277849	34277849	1	SSD
qAT3.1	rs3_9863242	3	9863242	2.44e-06	9862411	9863243	1	VGI
qAT3.2	rs3_9994802	3	9994802	1.81e-06	9994750	9995434	1	VGI
qAT4	rs4_30118095	4	30118095	9.7e-10	30091090	30217038	2, 44	VGI,SSD
qAT5.1	rs5_24802924	5	24802924	3.58e-07	24703167	24902334	1	SSD
qAT5.2	rs5_7785791	5	7785791	2.98e-07	7685852	7885771	2	VGI
qAT5.3	rs5_7939669	5	7939669	6.46e-07	7939206	7940134	1	VGI
qAT7	rs7_20704389	7	20704389	2.24369e-06	20704389	20704389	1	SAT
qAT10.1	rs10_1545534	10	1545534	1.58214e-06	1526422	1645441	1	SAT
qAT10.2	rs10_20562066	10	20562066	1.42e-06	20487909	20661868	1	SSD
qAT11.1	rs11_17462961	11	17462961	2.91e-07	17462961	17462961	1, 1	VGI,SSD
qAT11.2	rs11_376743	11	376743	1.0824e-06	277054	476173	1	SAT

## Sheet: Supplementary Data 4
Supplementary Data 4. List of candidate genes within the LD block interval of qAT4.
Gene ID	Gene annotation	Gene symbol
LOC_Os04g50870	elongation factor Tu, putative, expressed
LOC_Os04g50880	phosphoribulokinase/Uridine kinase family protein, expressed
LOC_Os04g50890	secretory carrier-associated membrane protein, putative, expressed
LOC_Os04g50910	expressed protein
LOC_Os04g50920	WRKY transcription factor	OsWRKY37
LOC_Os04g50930	Nitrate transporter	OsNPF7.6
LOC_Os04g50940	Nitrate transporter	OsPTR5; OsNPF7.4
LOC_Os04g50950	Oligopeptide transporter	OsPTR6; OsNPF7.3
LOC_Os04g50960	expressed protein
LOC_Os04g50970	seed specific protein Bn15D1B, putative, expressed
LOC_Os04g50980	hypothetical protein
LOC_Os04g50990	L11 domain containing ribosomal protein, putative, expressed
LOC_Os04g51000	Heading date and plant architecture regulatory gene	RFL; APO2
LOC_Os04g51009	OsWAK52 - OsWAK short gene, expressed
LOC_Os04g51020	hypothetical protein
LOC_Os04g51030	wall-associated kinase 1, putative, expressed
LOC_Os04g51040	OsWAK50 - OsWAK receptor-like protein kinase, expressed
LOC_Os04g51050	OsWAK53b - OsWAK receptor-like protein kinase, expressed
LOC_Os04g51060	expressed protein
LOC_Os04g51070	Programmed cell death regulatory gene	EAT1; DTD
LOC_Os04g51080	scramblase, putative, expressed
LOC_Os04g51090	tRNA-splicing endonuclease positive effector-related, putative, expressed
LOC_Os04g51100	COBW domain containing protein, putative, expressed
LOC_Os04g51110	Cell cycle regulatory factor	CDC20.1

## Sheet: Supplementary Data 5
Supplementary Data 5. The main haplotypes analysis of candidate genes.
OsNPF7.3 promoter 1000 (Sample_Size ≥ 30)
Haplotype	Sample_Size	30160495	30160496	30160526	30160536	30160541	30160562	30160570	30160579	30160622	30160755	30160821	30160822	30161107	30161131	30161201	30161222	30161226	30161250	30161255	30161273	30161302	30161306	30161312	30161330	30161350	Whole	Indica	Japonica
Hap1	111	T	A	C	A	G	G	T	T	T	T	T	A	G	C	T	C	G	A	A	G	A	A	G	A	G	111	4	106
Hap2	44	A	G	T	R	T	A	C	C	C	C	G	T	T	T	C	T	A	G	G	A	G	G	A	G	A	44	44	0
LOC_Os04g50970 CDS (Sample_Size ≥ 30)
Haplotype	Sample_Size	30172464	30172506	30172507	30172611	30173993
Hap1	151	C	G	C	G	G
Hap2	140	G	A	A	G	G
LOC_Os04g51009 promoter 1000 (Sample_Size ≥ 30)
Haplotype	Sample_Size	30200705	30200751	30200756	30200757	30200758	30200775	30200776	30200791	30200809	30200820	30200894	30200952	30200965	30201009	30201011	30201012	30201014	30201042	30201071	30201075	30201106	30201116	30201206	30201235	30201236	30201237	30201309	30201340	30201394	30201399	30201483	30201514	30201522	30201528	30201559	30201562	30201564	30201565	30201589	30201590	30201602	30201614	30201642	30201648	30201655	30201691	30201699
Hap1	128	A	C	C	C	T	T	T	A	T	C	A	G	C	A	A	G	A	C	C	C	T	C	C	T	A	A	C	A	G	T	A	C	T	T	G	G	G	G	G	T	C	G	T	A	C	C	C
Hap2	32	A	C	C	C	T	T	T	A	T	C	A	G	A	A	A	G	A	T	T	T	A	T	C	T	A	A	C	A	G	T	C	C	T	C	G	G	G	G	G	T	C	G	T	A	C	C	C

## Sheet: Supplementary Data 6
Supplementary Data 6. Hub genes of the 10 significant WGCNA modules.
Module	ID	WT-CK-L1_fpkm	WT-CK-T1_fpkm	WT-CK-L2_fpkm	WT-CK-T2_fpkm	WT-CK-L3_fpkm	WT-CK-T3_fpkm	KO-CK-L1_fpkm	KO-CK-T1_fpkm	KO-CK-L2_fpkm	KO-CK-T2_fpkm	KO-CK-L3_fpkm	KO-CK-T3_fpkm	WT-2h-L1_fpkm	WT-2h-T1_fpkm	WT-2h-L2_fpkm	WT-2h-T2_fpkm	WT-2h-L3_fpkm	WT-2h-T3_fpkm	KO-2h-L1_fpkm	KO-2h-T1_fpkm	KO-2h-L2_fpkm	KO-2h-T2_fpkm	KO-2h-L3_fpkm	KO-2h-T3_fpkm	WT-1d-L1_fpkm	WT-1d-T1_fpkm	WT-1d-L2_fpkm	WT-1d-T2_fpkm	WT-1d-L3_fpkm	WT-1d-T3_fpkm	KO-1d-L1_fpkm	KO-1d-T1_fpkm	KO-1d-L2_fpkm	KO-1d-T2_fpkm	KO-1d-L3_fpkm	KO-1d-T3_fpkm	WT-4d-L1_fpkm	WT-4d-T1_fpkm	WT-4d-L2_fpkm	WT-4d-T2_fpkm	WT-4d-L3_fpkm	WT-4d-T3_fpkm	KO-4d-L1_fpkm	KO-4d-T1_fpkm	KO-4d-L2_fpkm	KO-4d-T2_fpkm	KO-4d-L3_fpkm	KO-4d-T3_fpkm
Module: black	Os08g0374800	72.9706	24.2789	45.536	29.5678	50.9413	24.647	61.4065	28.6477	45.971	27.5366	48.8801	24.5375	39.3222	52.2064	36.1413	46.5862	19.9849	31.236	49.8477	41.5889	42.9869	34.4296	42.4577	47.3856	32.7234	27.62	33.0539	23.3665	28.6574	23.0589	38.2708	17.4	28.3224	15.331	29.7752	14.597	23.5	55.0622	22.2219	51.9115	24.2459	54.7392	18.7322	51.797	35.2413	34.3385	21.0051	52.5114
Module: black	Os06g0554300	43.0297	15.5288	29.7561	16.2885	30.0395	18.4665	39.3455	17.6241	31.5416	15.6052	34.1063	15.8429	27.4114	22.0608	15.2421	16.472	9.3236	11.5047	28.3912	18.4722	19.3386	14.504	21.4827	22.8854	28.9856	17.0483	20.3819	16.0265	17.042	17.5363	27.5901	10.1441	20.5626	4.66	20.2165	13.4531	17.8864	32.0813	9.2392	30.2647	8.499	42.114	11.1827	40.7492	19.3518	17.8769	12.8492	38.1503
Module: black	Os01g0769700	20.2348	9.3267	15.6856	10.1335	15.2576	7.9729	19.606	11.4063	16.0026	9.6894	14.4115	8.3064	32.7602	37.3647	26.6152	27.9018	4.3337	11.7872	51.9138	33.3377	44.4966	23.8725	45.8848	28.2619	11.469	6.3422	11.825	5.1076	7.5509	5.9812	12.726	4.0693	11.1433	3.2553	8.5554	3.1567	8.0896	19.1503	4.2484	14.6078	4.6294	22.3559	6.2156	22.6453	28.4865	12.897	6.0818	22.1779
Module: black	Os06g0227250	17.4856	5.0131	11.8576	3.5545	13.4761	4.3312	14.9684	5.7005	13.6119	4.8343	13.0595	4.9046	10.7087	9.5756	6.9988	6.7603	3.4027	3.7639	12.5479	8.1127	10.0429	7.5961	9.7754	8.3483	9.7497	5.489	5.9548	6.7019	4.813	6.2568	8.7245	2.4639	6.0906	1.7525	4.9922	2.9126	6.009	16.1002	2.4575	12.0774	3.7327	13.9593	3.9994	13.63	8.9297	7.3969	4.6942	14.0119
Module: black	Os02g0726500	9.7351	3.2308	5.6519	2.4017	5.9225	2.6947	7.3107	4.1181	6.4901	3.119	6.5602	3.4936	9.6597	7.1795	9.2146	4.5344	2.7706	4.5337	9.908	6.7616	9.601	5.0473	11.3465	7.1209	4.3885	2.7705	3.6282	2.8195	2.3747	4.1633	4.6684	2.7569	3.6423	1.1762	3.1482	2.2202	1.9534	12.5932	1.7072	7.3262	2.0349	12.397	2.6003	9.3282	10.2361	4.2953	2.5264	9.2801
Module: black	Os01g0616300	13.5917	4.6943	5.7393	4.3074	8.1465	5.4543	14.5866	6.0706	8.6493	5.9546	7.9157	4.6602	7.4078	5.9523	5.3085	4.0867	3.3501	3.2277	7.7493	6.1218	8.0607	4.6899	7.0413	4.9486	4.3053	3.1448	5.1553	2.215	3.6439	3.1583	6.561	2.0121	4.7578	0.7941	4.2178	2.8215	4.8766	9.0458	1.8914	8.5695	2.5005	20.0403	1.3415	20.2964	7.0362	7.3759	2.9305	15.6422
Module: black	Os05g0555100	11.9208	4.8688	6.8309	5.0963	8.3223	5.3941	12.0215	5.5369	8.0977	5.7906	8.2717	4.9537	17.9357	7.6718	22.6667	3.5213	2.8243	3.5422	8.8634	5.5953	18.0456	4.9917	11.2416	5.555	4.7686	5.4308	5.0557	5.6019	3.7793	7.901	6.5826	2.2391	4.3196	1.3389	3.1558	3.3003	3.538	15.4831	2.1526	12.5691	2.8051	19.9975	2.6683	16.322	23.8194	10.9655	3.6286	19.7497
Module: black	Os03g0703000	183.182	57.3824	111.066	59.144	142.021	61.5349	185.413	68.8456	142.171	65.5399	125.472	64.9242	180.78	160.301	146.463	122.59	58.506	73.37	158.709	117.243	158.577	107.042	130.856	143.96	122.002	66.321	118.708	59.6998	90.6521	66.5809	134.518	35.7241	112.732	19.1256	98.5949	44.4955	75.4805	141.201	62.3951	198.327	55.9941	147.344	56.3281	182.267	130.274	89.0998	60.8561	147.146
Module: black	Os01g0738300	9.6195	3.1147	7.3682	3.6627	7.1131	3.8177	8.3661	5.8101	7.0163	4.3971	8.0381	3.9758	7.4212	12.6618	4.2177	9.4828	1.5622	5.8163	8.6279	11.0922	5.7566	7.5575	8.0357	11.156	6.0162	3.3829	3.7224	4.5038	2.6128	5.4447	4.9615	1.6693	3.2186	1.3886	3.6235	2.4956	2.8413	13.0426	1.846	7.8945	1.2793	11.5959	2.2163	10.7711	5.2252	6.0314	2.6665	12.2745
Module: black	Os01g0616366	7.0999	2.3973	3.0313	2.2968	5.1355	2.3089	6.2645	2.7587	4.4302	3.6915	5.0522	2.5529	3.1138	2.8844	2.648	1.3926	0.5175	2.031	4.5438	3.8623	4.5556	1.9697	4.0025	2.742	2.4675	2.4094	2.1331	1.4114	1.6387	3.1421	2.7327	0.746	1.5636	0.552	1.4965	1.3893	2.4447	5.915	0.7396	4.9642	0.771	7.3094	1.2142	6.9627	3.6709	2.481	1.2307	8.253
Module: black	Os01g0805900	456.87	130.019	286.894	137.512	310.374	126.711	435.123	145.805	344.173	140.367	306.872	133.672	159.939	182.348	147.899	128.979	63.4248	64.6993	132.714	114.123	148.088	105.752	142.868	199.199	187.932	69.0289	173.602	163.937	109.766	104.184	198.109	37.7378	161.684	19.1693	120.282	57.867	89.2197	194.292	54.4091	185.229	65.3444	266.266	66.1987	309.881	130.486	88.4195	68.2895	277.028
Module: black	Os05g0543100	10.0052	3.4956	4.4389	3.7215	5.1501	4.7369	8.1947	3.8592	6.2195	2.8665	4.8773	3.5907	5.5516	7.9832	5.3387	5.0503	1.7364	3.5312	5.5104	6.1676	4.1022	5.1944	4.1007	8.7327	3.3775	3.0156	4.2401	3.3554	1.6171	4.0819	3.2547	0.8742	4.2367	1.498	3.466	1.4516	2.2516	8.6968	1.2704	11.6971	2.0058	14.2494	1.4858	12.0551	3.6975	5.9847	1.9056	10.7891
Module: black	Os02g0264800	85.1429	22.0807	31.5252	41.7503	50.4912	25.5462	74.1322	30.8521	59.4796	19.8739	40.1318	22.8737	51.181	34.1003	41.3085	16.5844	11.1123	11.1688	48.8973	16.5995	62.9875	21.5699	55.7532	27.4377	26.0439	22.4805	30.5727	13.4285	15.9371	25.98	29.2461	9.5907	25.727	5.1461	15.6511	12.3867	13.9198	61.3168	6.8208	53.7449	9.9491	101.764	9.3776	94.4912	37.5505	42.2801	12.2526	96.2605
Module: black	Os01g0195200	33.8611	7.4702	19.1455	7.1095	24.7907	7.5264	31.6674	7.9645	20.2836	9.2189	20.681	6.7125	19.4991	12.8834	15.3309	9.0768	5.273	6.4406	17.9096	12.2409	17.7478	9.6682	18.8959	13.7266	15.6635	8.2772	14.2158	7.3058	8.4344	13.1111	18.1047	6.334	11.3834	2.1137	9.1526	5.4695	8.3572	32.557	5.2262	25.3509	7.1415	31.3896	6.9381	23.8229	16.2106	15.7419	6.995	31.2769
Module: black	Os03g0717000	22.6427	5.0466	12.9233	7.1799	16.9254	6.1745	22.2632	6.0434	15.4926	7.0905	12.9295	5.4097	22.4777	12.961	19.6375	11.1352	5.4313	6.4803	42.4827	14.0965	30.5458	11.2203	34.6545	10.7795	11.0791	9.0392	11.8959	8.0512	7.4801	9.4748	11.8083	6.0323	8.9767	3.7804	7.9878	6.6708	8.1148	19.112	4.6087	19.549	6.6942	21.866	6.0683	18.1972	17.8818	13.2408	7.2466	17.977
Module: black	Os01g0897700	25.1781	14.318	17.664	12.9132	16.7477	13.1237	23.6444	16.0226	17.6168	15.5531	18.3278	13.2979	21.7591	24.2029	13.8731	15.1748	10.4266	13.476	22.1357	22.3983	19.4818	14.6508	26.3929	19.164	17.1619	7.5763	14.3882	12.6392	13.1138	12.0089	18.0915	5.3082	13.341	3.8765	12.9373	8.6201	11.4153	23.7285	9.2336	18.8848	7.9017	19.0572	10.8428	23.5249	21.5895	17.0002	12.3047	23.1964
Module: black	Os04g0625000	38.7827	9.8271	19.3529	7.5398	26.9575	10.0261	42.0501	11.3076	27.203	12.6088	23.4237	9.7907	39.9927	20.7961	31.2602	11.3624	9.7269	13.0579	33.9394	22.5354	34.9302	15.8831	29.084	17.2519	16.642	12.073	18.1375	7.8986	11.9582	18.66	15.1943	9.5443	12.2982	4.1889	11.8591	10.121	14.5049	43.5538	5.9067	37.0869	10.7398	74.9931	8.8459	46.7754	27.499	31.1945	10.3264	57.7376
Module: black	Os04g0412900	11.486	6.5299	6.1945	6.9061	8.0562	7.0869	10.475	7.4876	7.8882	5.3975	8.8163	6.402	10.1429	8.7347	7.9118	8.5032	3.6393	6.7016	11.6245	9.4672	10.0797	7.0596	9.235	11.5654	7.718	4.3141	5.854	6.9984	4.9163	7.3404	7.0038	3.3267	4.6546	1.5464	4.9241	3.1118	4.864	18.0029	3.1572	19.6008	4.969	20.2314	4.2153	16.5621	11.4289	8.8574	4.4112	18.4168
Module: black	Os05g0391200	75.7297	37.7049	58.4261	33.7184	49.791	36.9074	70.7591	39.906	58.9317	40.3247	61.4254	42.0507	58.9942	58.6163	47.3168	37.7834	17.4835	28.4788	59.1579	37.8196	49.2418	31.5061	57.2691	55.5615	43.6254	22.8369	33.1079	34.9629	30.3052	31.2833	44.5732	11.3169	32.2253	8.213	34.6787	20.4086	24.1542	52.2098	22.0242	38.9554	16.9584	48.7541	21.51	56.0501	52.1448	30.3999	24.862	58.6304
Module: black	Os02g0771700	24.8887	8.8263	17.7972	10.5886	15.5088	12.2338	21.3921	12.2962	15.5041	9.4407	15.0724	9.5272	10.8172	12.1869	6.4131	8.9952	8.1994	6.1293	10.1148	10.0307	8.4671	8.8407	9.0726	11.8181	13.6846	8.2509	12.1819	7.5062	8.0699	13.3401	14.6392	6.3642	12.6095	3.6328	8.9632	5.4979	8.422	39.4799	4.9141	41.8818	7.6539	44.1229	6.2273	33.7404	7.652	23.2938	8.462	46.9119
Module: black	Os12g0554800	27.1024	4.0139	9.7509	4.9897	19.1428	4.0765	23.137	5.3013	16.0676	4.2929	13.3478	3.4209	2.5325	3.4276	1.4092	3.178	2.5328	2.4819	2.0471	2.6646	1.9415	2.8386	2.972	2.2618	10.1255	3.0377	9.6189	1.9051	5.3762	2.0997	11.0894	2.2562	8.6274	0.6577	6.9867	2.3369	5.3774	12.6179	2.1992	8.4124	2.3897	13.6742	4.1933	16.1867	1.8098	5.3562	3.244	12.4456
Module: black	Os12g0454600	73.5925	18.0369	40.238	22.9969	42.9758	25.0483	53.8558	23.0249	53.7639	17.6935	42.8773	21.8921	52.0575	39.5915	29.2173	32.4474	6.8987	14.0841	57.5233	34.1408	46.4394	30.4338	56.602	48.8672	28.5919	5.6615	25.8756	12.2174	16.0544	16.396	29.6273	6.5807	25.2934	1.2367	20.5277	6.5913	9.6762	34.8644	8.2234	36.8837	4.3445	58.7615	8.651	52.9634	42.0862	16.0576	9.746	58.8067
Module: black	Os07g0568000	20.3458	11.3864	16.0036	9.7571	14.8526	10.008	19.4412	11.7888	15.9168	12.3166	18.0133	11.7186	12.1516	14.0522	9.4196	9.764	8.1257	8.0268	9.7061	14.7835	10.6339	10.6644	9.022	13.5116	13.9915	12.1249	11.3599	13.3712	9.5184	12.9907	13.4888	7.5978	10.4538	5.0188	9.9113	8.1733	9.6699	22.6282	8.142	24.7996	7.7126	20.2984	9.6304	16.5921	9.7917	14.6848	9.6764	20.7381
Module: black	Os04g0495400	48.3016	16.5385	21.1581	27.7226	32.1057	18.2249	41.3989	24.9179	26.1003	16.8135	22.6516	15.5092	13.9613	24.353	12.0167	17.1063	5.1481	5.9928	16.5851	14.5006	15.1346	13.4106	16.3945	17.4395	14.1297	6.1412	19.9339	5.2861	13.0611	7.5134	20.8627	3.3262	15.0988	1.1093	13.3496	4.5574	8.816	22.0987	6.6057	9.6709	7.3714	25.7423	6.735	33.5153	9.6413	7.525	9.1046	29.5379
Module: black	Os02g0702600	21.8051	4.2084	10.8985	3.7545	13.2038	4.1127	19.9803	5.6512	11.3141	5.8643	13.7914	4.4715	10.878	9.0254	9.1202	5.1249	5.7997	3.6009	7.1476	9.4543	10.3625	5.3759	8.5428	7.9521	8.7926	6.6946	11.0005	7.783	6.0404	10.4446	9.2245	4.2766	6.8417	2.2458	6.484	6.015	6.5504	24.8727	3.1407	16.5996	6.1007	20.4087	5.8204	20.9722	8.0715	13.1866	8.2095	17.3395
Module: black	Os05g0478300	4.4744	2.1893	2.3932	2.9187	3.3171	2.4493	5.3693	2.3568	3.5117	2.7444	2.5694	2.07	1.5445	1.9809	1.4552	1.228	1.1548	0.9746	2.2462	1.7945	1.3322	1.2712	1.8901	1.6149	2.6547	2.1151	2.2594	2.6785	1.9793	3.4356	2.6454	1.1746	2.0603	0.3642	1.9786	2.1471	2.3268	5.6294	1.0056	3.1358	1.8331	8.9497	1.4859	8.2532	1.4761	4.9277	1.7719	6.9513
Module: black	Os03g0799100	72.0495	37.2943	51.5482	36.9273	54.7435	29.6143	70.1524	38.0474	55.2097	36.2383	48.4921	27.183	48.8324	52.4702	39.7099	41.7339	33.8146	33.2749	40.885	53.1174	44.0347	46.7111	36.1274	46.9978	43.8705	38.0348	43.2532	34.301	31.4816	39.4412	40.624	28.6537	40.0019	19.5716	34.9961	31.2292	36.2614	74.3538	31.3562	72.1264	33.6346	88.3643	30.2053	73.4916	36.3328	58.7991	32.2924	66.6551
Module: black	Os02g0805000	10.8384	6.5734	8.6659	7.4398	8.3063	6.8066	10.9525	7.7731	9.0591	7.1407	9.4326	7.3777	7.8555	7.7747	6.4218	6.7599	4.393	6.1794	8.6537	8.391	6.6909	7.2196	8.1739	9.4321	7.8464	4.7984	5.5377	6.0049	5.1994	5.5842	7.053	2.2516	4.9479	2.2215	6.356	2.3395	4.9767	11.2855	4.1185	9.5582	4.013	9.5617	5.6464	10.8978	6.7182	6.4276	5.1767	11.3949
Module: black	Os01g0819100	13.2551	6.0306	6.1139	7.5539	8.0745	5.1618	13.386	8.2411	5.7349	5.799	6.3819	4.7063	3.6277	6.3541	2.9026	3.2651	1.0903	1.3145	4.0553	4.3429	3.0573	3.785	4.5393	4.2352	4.7602	3.5146	4.2248	3.6624	3.2844	6.8116	5.721	2.4715	4.2505	1.313	3.8191	2.9991	3.3228	12.6801	1.8616	9.6391	1.5878	14.3181	1.7164	11.9573	2.7184	5.8076	2.5093	12.8945
Module: black	Os02g0528100	7.431	3.3798	4.809	3.0355	5.9935	3.2797	7.8637	3.1909	6.7849	3.5931	5.5578	2.587	5.4376	6.4127	4.8669	5.7314	1.42	2.7261	4.7279	4.2958	5.2509	5.102	5.7794	5.7745	4.1054	3.3306	3.8106	3.4052	3.0733	2.7909	3.6452	1.5519	4.2199	0.4138	3.1871	1.9115	1.6128	4.9283	1.996	6.7899	1.3451	6.898	2.1192	5.4011	4.965	5.5798	1.489	6.2764
Module: black	Os04g0455600	24.0616	6.7896	18.6445	6.387	15.0449	7.1336	27.9234	7.2425	17.9279	7.3114	18.0299	6.8901	16.7531	14.6647	9.7178	12.9273	5.3339	7.5256	11.8828	11.2643	9.7951	7.7886	13.3642	12.3784	14.0172	8.4237	10.8994	8.6706	10.0857	15.746	16.1231	5.9193	10.0938	2.3863	11.0071	6.6938	6.7489	36.8517	7.2918	32.9854	4.8161	22.1092	6.6305	20.7179	10.6448	16.3073	9.2119	26.889
Module: black	Os02g0200800	25.0787	11.9345	18.0404	12.4025	18.281	10.4675	25.1332	13.0378	19.4603	11.904	20.8329	10.8272	26.4067	15.3525	17.951	13.271	14.9536	8.941	20.1661	16.3017	21.3593	12.0741	22.5819	14.9615	17.213	10.4828	14.8927	11.7575	13.3022	14.6755	17.1162	5.4685	14.7	4.4961	16.4559	7.9877	17.3569	28.1312	13.6544	28.8404	14.7005	39.2242	13.886	31.7355	19.1156	23.6322	14.8296	30.5101
Module: black	Os03g0210500	44.8148	12.8823	19.1196	17.0912	26.5023	14.2565	41.8439	14.4712	25.3893	15.3006	27.9911	14.9568	18.7357	16.3629	10.4819	15.3511	5.5478	10.0418	19.3778	11.9313	16.1253	8.7923	20.5228	16.5126	16.9582	10.4602	16.0258	10.6407	11.6851	15.9287	18.1707	6.7899	15.1162	5.3964	13.467	8.4301	8.461	27.4611	7.7566	29.9178	4.9146	30.7286	6.6804	39.8043	7.7835	23.604	11.8461	42.6794
Module: black	Os05g0587300	9.3308	2.7777	7.4968	2.8255	6.4972	2.6401	8.322	2.8276	5.9887	3.6637	6.9356	2.652	8.1101	3.9376	4.6023	3.7918	3.238	2.5587	10.6881	4.2311	6.2846	3.7578	5.0511	3.3396	6.9323	3.5067	5.7377	3.2707	4.264	4.6545	5.9688	2.7011	5.435	1.4124	5.0958	2.4856	4.4534	10.7632	5.0622	11.6211	3.465	15.0702	3.5173	12.1496	4.9867	7.0535	4.1797	11.7314
Module: black	Os03g0304500	6.993	2.0943	2.552	2.608	4.5157	2.6327	7.309	2.3736	4.0492	2.3921	2.2542	1.7398	2.4465	3.3519	0.7792	3.0963	0.8064	1.1272	2.7257	3.8434	3.7226	2.6073	3.3913	3.5055	1.7546	1.2955	2.1079	0.829	1.7101	1.3907	1.6952	0.6379	1.4706	0.2797	1.3233	0.9318	1.4866	6.85	0.6246	5.1212	1.1011	12.7738	0.9599	10.617	1.5203	4.8893	1.2743	8.8282
Module: black	Os04g0514800	13.3179	6.9817	9.3872	6.805	10.0801	10.6198	11.6445	8.8888	12.8501	8.0195	11.7755	8.3895	18.6207	19.4771	13.7264	14.3491	3.78	11.4707	17.0798	18.1356	15.5678	14.564	13.939	17.8823	7.0042	5.3962	5.7553	7.8992	4.8399	8.9228	9.6688	3.6973	7.411	2.1119	5.4176	4.8179	5.2152	15.4507	5.0304	13.7425	3.7786	19.4788	4.2065	16.7928	14.4763	12.3686	4.849	17.8891
Module: black	Os01g0625200	40.5492	11.5991	32.0768	11.344	27.6039	15.2419	37.1822	13.1813	29.9879	15.375	33.6261	14.0043	55.4046	33.395	78.0553	23.3329	15.0454	13.3535	37.2186	26.2425	64.39	20.0518	45.2566	34.9527	22.6285	19.2773	21.2861	22.0351	18.186	23.5867	23.2743	6.9572	17.7275	4.4972	20.6657	12.6152	19.0785	43.6113	11.1348	43.0722	13.8851	61.4869	14.8703	52.8828	74.416	31.1468	14.3036	43.397
Module: black	Os04g0376700	14.1779	5.4944	10.8008	6.6458	9.9837	7.673	14.2469	8.9429	13.7466	7.642	10.9292	6.5217	9.3049	12.9958	6.2709	9.0741	3.1892	4.6247	9.5678	6.5977	9.0319	8.4397	8.1385	13.4729	7.7195	4.3933	8.0658	8.9441	4.5455	6.9914	9.0121	5.8405	5.6223	2.3235	6.1091	2.8896	3.732	17.5658	2.0478	20.1625	2.7851	26.7137	2.0608	22.4921	6.7521	10.5825	1.8436	22.4341
Module: black	Os03g0120000	8.7738	2.1023	3.6232	2.3414	4.9812	2.1227	7.5881	2.9606	4.376	3.2193	5.0142	2.5162	2.0152	4.2908	1.1982	3.5105	1.397	1.8429	3.5859	4.3769	2.1476	3.8288	1.8824	3.5873	3.539	1.5398	4.1858	3.3619	2.4257	4.3263	3.3668	1.2586	3.4718	0.9496	2.4007	1.1355	1.445	6.3669	0.9134	7.6416	1.7437	8.1932	1.1569	6.6869	1.005	5.3623	2.1397	6.7216
Module: black	Os01g0140400	6.7294	1.4741	3.4243	2.1904	4.9892	1.4707	6.7223	2.2169	4.9025	2.7581	4.7653	1.8738	4.312	3.0563	3.7099	2.4383	2.7983	2.3741	4.243	2.3507	4.2669	2.5708	3.6104	3.3698	4.304	2.633	4.0803	2.3788	2.9036	2.8266	4.0764	1.8488	3.1526	0.7344	3.24	1.9359	3.2873	5.1314	1.8197	4.6695	2.6229	7.0302	2.8264	6.5917	3.4289	2.9575	2.8412	6.5724
Module: black	Os08g0561800	13.2951	10.1733	8.4021	10.1324	8.3227	9.4783	13.3453	10.7659	9.3357	10.2769	10.5104	9.5767	7.1502	10.6737	4.8826	9.3208	4.2367	6.0987	8.4791	6.7202	7.5599	8.4909	8.8278	9.928	7.9546	7.0866	7.6866	5.9619	5.8996	8.2283	8.6528	4.2812	8.2679	3.9185	7.3321	5.3342	5.92	18.1383	4.091	21.5195	3.8771	16.8865	3.9494	15.1292	8.0664	14.232	4.0144	17.555
Module: black	Os11g0470600	47.2375	24.2174	33.4893	19.8294	31.6439	18.9108	53.5906	24.895	37.1304	19.6286	37.8376	20.0256	32.0841	13.551	38.6504	10.2477	23.8685	11.1212	39.2593	12.7052	30.2143	13.0524	26.4317	13.2029	27.8067	10.5773	27.9954	15.6367	19.3712	16.4053	29.3278	9.0035	32.0478	5.9507	21.0148	13.2533	21.7968	34.8324	17.8205	26.6869	17.6088	58.5114	20.4435	53.0766	28.4792	37.4703	23.6716	40.9166
Module: black	Os07g0645000	25.337	10.8656	16.0765	7.3393	17.2559	12.1361	24.3474	9.7004	16.4998	10.237	16.7883	12.559	14.8787	18.7174	12.767	15.1842	4.0607	7.9501	11.2689	11.0919	12.6503	11.0741	11.5346	17.1464	12.5452	8.6235	11.8004	12.9445	10.359	8.8356	15.0442	2.9457	12.4767	1.7813	13.3206	4.5803	7.4183	16.9905	6.4759	15.2793	4.0474	17.7451	5.8404	20.1387	10.1646	8.3337	5.6222	19.1613
Module: black	Os10g0160100	10.7787	4.5488	4.001	5.6248	7.18	6.9256	11.4321	4.9173	6.8206	3.9131	5.4167	4.3737	3.5273	3.9243	2.0908	3.6247	0.6239	1.6959	2.8199	2.6552	2.4652	2.8658	2.6543	4.8834	3.7801	3.6067	3.4066	1.5468	1.9481	4.4898	5.2326	2.1461	2.4107	0.9074	1.841	2.463	2.6197	8.8755	0.9006	9.2711	0.8962	16.2965	0.7718	16.4041	2.2197	5.7402	0.814	15.852
Module: black	Os01g0514600	6.1619	2.4576	4.1407	3.7067	4.5925	3.635	5.6382	4.0526	3.9926	3.1063	4.7656	2.709	3.324	3.4037	2.4815	3.4969	1.376	1.5476	4.5284	3.5268	3.8272	2.0567	2.5983	4.4415	3.1353	2.9948	2.2281	3.9801	1.8257	4.3769	2.3431	1.5151	1.8399	1.223	2.3008	2.3539	2.8889	7.0953	0.9913	5.7988	1.6738	10.4264	2.0268	8.9915	2.4681	4.3433	1.9904	8.7032
Module: black	Os02g0741800	11.9427	4.8613	5.4638	4.1526	8.1799	4.9586	12.6988	4.948	7.3518	5.9797	6.5406	3.5467	11.8887	12.9872	10.0985	6.2657	3.995	5.4323	10.1908	9.9746	10.5251	7.7898	10.4585	9.3741	5.4071	5.4957	6.1028	4.8676	4.4597	8.1408	5.4869	4.648	3.7876	2.8002	4.4998	4.2177	5.4159	19.1576	2.0783	21.8086	4.1636	16.8486	2.9352	13.9408	8.3534	8.512	2.7333	13.3613
Module: black	Os01g0134500	55.1741	21.7859	41.3994	29.3541	52.9075	26.9972	56.7098	28.8441	50.0625	23.2216	42.6377	22.2564	29.8674	35.662	39.2316	27.3952	20.4388	21.0755	22.3172	27.8396	34.3314	21.8965	23.3406	35.3338	37.072	23.2975	34.9206	24.8577	24.6394	28.1439	34.1152	16.391	33.5802	5.2988	26.3631	24.818	33.0369	72.9878	21.2266	73.7336	31.0718	95.8409	29.7182	70.7307	22.9893	46.1192	25.3958	70.7698
Module: black	Os06g0227300	22.7673	4.6912	11.1418	4.1159	16.768	4.5523	20.3288	7.8074	13.3358	4.6756	13.3713	6.1831	12.8649	13.5064	6.2664	10.9221	5.0888	4.3776	10.1254	7.7273	13.1989	6.2016	11.6985	10.0673	9.5661	5.2283	9.2749	5.4073	9.1037	5.2147	10.0015	0.6549	6.9492	2.1539	8.5806	3.8266	4.706	14.8708	2.95	12.3339	3.1725	9.8987	3.4114	14.8372	9.2465	8.6053	4.1732	17.3303
Module: black	Os07g0112700	94.1399	50.2237	38.8505	60.8462	55.9328	54.9137	83.9598	58.3032	51.5794	44.5858	49.5701	45.6723	31.4732	81.061	20.9471	50.3111	10.5628	24.2087	30.4143	59.5559	30.145	42.8492	33.1683	59.1777	28.2642	14.7529	29.1369	21.5675	18.1286	23.3557	29.2104	13.1294	24.992	6.3262	17.0678	13.8258	19.3305	67.681	7.7734	46.5535	10.3533	101.134	8.5882	111.948	22.2167	44.4304	13.5724	78.0081
Module: black	Os01g0835000	3.7899	2.2515	2.2358	2.379	2.7539	2.325	3.9477	2.3029	2.0779	2.0241	2.6306	2.1791	3.5007	3.3455	1.9692	3.4537	1.7015	2.5585	3.0103	3.0255	3.0344	2.984	2.5869	3.2855	2.5419	1.8656	2.263	2.0003	1.7949	2.0518	2.5641	1.1629	2.2084	0.678	1.9218	1.5288	2.0788	4.1408	2.1273	3.2161	1.8012	4.692	1.5694	3.9943	2.3393	3.1775	1.9608	4.3168
Module: blue	Os05g0482700	54.0933	126.549	50.5676	123.847	50.8541	140.328	59.7578	134.662	58.2339	143.044	55.3739	125.21	59.8802	185.129	50.1579	160.43	44.4428	146.509	53.9171	161.94	60.2314	144.742	72.5207	209.382	69.7168	108.518	59.6979	153.024	66.2483	163.454	72.8034	71.1001	57.098	57.2427	61.3836	86.678	55.6557	213.903	41.9861	179.205	46.9109	255.936	43.254	218.132	62.1678	138.87	49.9917	260.789
Module: blue	Os02g0591800	12.7142	44.5321	18.8385	44.5248	14.8978	43.9433	18.1764	48.4377	13.991	54.0827	14.3999	41.9045	19.6437	56.2688	17.8061	44.7132	18.0012	39.4325	19.712	56.3158	18.1535	47.7699	26.5446	52.5967	28.5588	35.4918	22.784	52.1845	25.4798	58.6838	27.0388	24.3086	22.286	23.6314	28.1116	33.1744	21.3057	71.3189	17.0875	59.7139	25.7196	124.688	19.6052	91.7964	25.5089	50.0861	24.9173	92.1683
Module: blue	Os05g0147400	31.6376	66.9474	28.5432	65.3584	31.8986	64.116	38.4144	66.1315	26.5818	75.3094	28.4792	61.4986	38.6727	90.3251	34.4366	77.3674	28.8522	63.3609	34.8623	88.8246	33.604	66.5474	46.0871	87.7998	39.6519	55.0634	36.7661	83.5826	38.4281	90.7872	41.1979	35.157	31.355	33.7464	35.6298	48.9806	35.2829	106.683	26.5717	90.7361	34.0298	160.193	31.7572	121.416	39.6093	71.6583	36.3791	139.409
Module: blue	Os04g0501000	149.241	415.001	136.151	432.204	182.232	425.703	180.01	408.792	132.4	424.221	124.016	412.932	217.499	467.514	191.159	371.506	220.761	331.717	218.658	451.729	202.753	404.705	240.077	462.414	248.678	361.832	221.46	495.059	257.567	500.374	254.53	254.912	238.631	245.131	255.542	363.768	209.394	605.719	192.911	596.648	235.518	1062.44	187.905	845.601	222.804	554.361	217.126	808.799
Module: blue	Os01g0686800	69.7167	202.385	76.4035	202.957	84.6242	220.143	86.4489	205.266	72.8494	215.911	71.7947	218.869	95.9943	200.126	87.7446	138.973	115.336	126.996	120.117	165.429	96.2749	143.959	132.542	193.419	126.727	169.244	111.249	249.982	123.263	256.557	143.393	133.307	119.59	110.872	114.07	156.846	97.0998	350.11	87.2479	301.631	112.141	563.705	92.8831	450.116	111.865	328.853	119.966	494.238
Module: blue	Os02g0699600	99.373	266.13	93.7827	277.574	121.591	306.386	120.983	272.276	98.8432	303.032	88.1095	283.212	156.711	279.668	154.403	202.691	177.451	178.597	168.876	254.421	155.553	219.328	191.629	236.329	179.617	236.053	166.828	346.587	189.658	358.204	187.838	189.17	175.105	170.756	169.13	227.199	152.567	463.322	139.696	394.136	175.036	714.763	135.251	546.447	173.332	381.638	169.944	527.998
Module: blue	Os02g0467200	29.5679	63.389	26.8072	61.1751	34.0892	57.9301	38.1607	67.8811	26.2185	63.3209	31.8623	63.5558	47.093	71.2498	41.4619	57.6565	37.2413	50.938	47.8759	61.2153	44.748	53.6591	55.432	56.4307	35.1221	46.014	35.3616	63.9658	30.978	63.9649	41.2268	38.607	37.0224	35.3694	32.3438	44.8836	34.0449	91.3489	35.8746	99.299	30.2695	144.917	32.1477	126.002	51.6248	84.4997	38.3698	109.874
Module: blue	Os06g0300600	4.4995	22.4183	5.6338	21.3001	5.9514	21.8121	8.0384	22.1683	4.9085	21.3217	5.1109	20.9698	7.7841	20.9383	7.808	19.7877	7.1815	14.7336	6.8236	20.5404	5.5837	18.2298	8.1771	19.5746	11.4204	12.2082	10.0783	23.35	11.1243	26.2418	10.3883	9.1432	9.6895	10.244	7.9182	13.8532	9.2092	32.2618	5.7814	35.3576	11.4542	51.3895	9.081	38.9414	6.6898	27.6407	9.9449	38.6733
Module: blue	Os07g0565000	55.154	112.969	45.5753	112.545	59.8358	111.787	59.3465	115.649	53.0853	123.188	45.2359	107.135	54.848	163.786	62.321	126.612	54.4844	101.553	55.5566	142.198	65.6301	129.148	71.3512	139.875	63.2354	99.0486	56.2084	128.386	66.7902	135.016	71.2847	71.2771	58.5074	66.6101	69.9641	85.1652	49.1351	211.847	46.0375	230.396	60.0093	303.739	49.694	240.507	57.4543	194.463	57.9292	238.029
Module: blue	Os05g0528900	16.9961	43.0474	12.2865	40.4824	16.9156	35.1269	15.8202	38.2488	14.009	42.8449	17.2679	36.5066	18.1932	55.3641	18.9634	43.3125	22.8931	33.9368	16.3053	49.5804	18.3509	44.7037	22.0572	48.3201	25.7538	36.4985	20.9498	40.8475	28.6957	39.4614	24.539	24.3127	25.8278	17.0696	27.3791	28.1709	22.7059	64.1195	18.5103	56.8861	24.8227	99.8604	19.3515	77.5207	18.5419	60.1201	23.54	74.6945
Module: blue	Os10g0337500	1.0284	5.4946	0.5309	5.2339	0.8397	4.4062	1.2881	5.6899	0.7772	5.6791	0.575	5.5074	0.4465	9.3341	0.3975	4.7791	0.1003	4.2004	0.2547	6.8351	0.4637	7.085	0.5734	6.839	0.7614	4.421	0.5436	6.8664	0.4308	7.9893	0.4141	4.1584	0.3494	2.3546	0.3553	4.9437	0.4635	16.9336	0.2124	22.3538	0.2174	18.1739	0.2637	15.3271	0.3927	9.1576	0.2304	18.0145
Module: blue	Os01g0860300	35.0981	65.2441	27.0691	71.4863	40.3847	78.4001	39.8476	69.0386	30.5759	77.9035	26.7753	73.9785	39.1554	100.015	35.8362	77.4201	25.694	65.3649	37.4338	82.6056	41.0264	72.4241	45.2226	106.78	41.7009	64.2946	35.5746	87.1013	41.0114	91.9166	50.739	41.4911	36.1378	36.9241	46.0052	53.937	32.733	126.283	31.9228	112.647	28.5708	175.338	24.259	146.761	43.2029	80.6799	31.1647	153.204
Module: blue	Os03g0205700	3.0841	6.3069	2.8302	7.1454	1.7579	9.2426	3.6142	8.8665	1.5494	8.8497	1.8105	7.0688	3.9802	7.4025	3.569	4.5229	1.0136	4.6091	3.431	7.1976	3.5875	5.7643	3.5283	7.4655	2.2864	6.8674	1.6711	6.3662	1.8495	10.8016	1.743	3.0438	0.8824	2.8529	1.7945	3.8946	1.0462	17.1307	0.9656	16.2702	0.8694	22.1751	1.5696	17.2295	4.5782	9.1181	1.4961	20.1629
Module: blue	Os08g0399600	3.0326	13.2834	2.9817	12.0397	4.9941	11.3251	3.9981	11.7167	2.9752	15.3851	2.7001	11.3187	3.2513	21.1544	4.5365	16.2951	3.6886	13.4917	3.0047	18.9237	3.9286	16.7754	4.0034	20.1189	6.4721	9.3181	5.7378	14.4761	7.1564	18.6162	6.1777	7.2149	5.8991	4.0676	5.7972	9.2512	4.9075	21.7887	3.4036	15.832	5.7348	31.1651	3.3508	20.2775	4.1686	16.426	4.8205	28.2138
Module: blue	Os05g0541900	27.4774	73.8275	25.0712	80.6698	32.4826	78.6597	31.1851	76.3387	26.9074	78.46	24.2469	79.0872	35.2106	92.5658	37.3384	71.6976	41.6825	62.1163	39.8443	88.2793	39.3802	77.7267	44.9052	83.7381	49.4249	74.9536	44.4773	101.945	43.9613	99.3163	49.9621	56.0469	44.9027	49.591	44.1001	68.0853	38.8616	138.798	35.0221	125.975	43.1941	228.638	35.9565	183.762	40.7821	128.882	44.727	159.127
Module: blue	Os03g0366000	11.6677	42.4879	11.2724	48.0757	11.8091	44.723	16.7645	46.2042	13.3164	45.1906	12.1007	44.3635	8.3283	47.0812	9.0628	33.8819	7.9191	23.1855	8.3771	41.6938	7.3196	33.3623	8.4263	43.5803	12.9107	32.0137	10.1656	52.8162	12.9203	48.933	14.4197	18.2641	14.9235	14.7817	15.2357	31.0131	6.2348	64.0269	6.6226	53.1741	9.8673	97.7044	5.1283	76.5595	7.748	60.1805	10.2608	88.1424
Module: blue	Os10g0465800	257.666	572.629	236.902	605.279	297.675	630.135	297.31	566.655	221.446	631.195	229.268	599.251	372.993	627.779	340.342	505.726	350.598	455.086	389.663	565.774	345.076	490.564	440.919	563.418	391.862	538.304	371.215	777.535	426.759	716.706	392.065	407.074	380.044	366.767	391.984	542.152	318.072	991.005	317.226	792.807	358.869	1472.84	281.247	1268.33	408.3	879.575	342.935	1054.08
Module: blue	Os06g0701400	98.8934	207.523	89.2938	209.292	118.484	224.865	105.833	217.13	87.1666	222.545	76.5815	216.075	131.76	246.266	122.196	196.027	126.522	160.264	125.375	201.391	111.392	189.73	129.562	216.446	122.377	178.649	133.623	263.532	142.775	245.3	134.526	154.792	144.89	119.169	145.95	183.105	119.979	384.509	135.374	336.352	132.027	569.286	92.5298	455.042	114.778	371.822	126.538	463.805
Module: blue	Os01g0896700	166.968	420.188	161.572	412.209	225.407	432.757	197.333	415.705	181.131	455.311	145.6	408.791	226.911	610.858	220.123	445.112	175.604	433.414	200.616	482.889	215.169	480.999	232.184	535.205	223.294	395.995	207.941	494.274	269.537	546.502	248.43	291.543	225.421	254.974	267.125	326.592	191.88	721.687	203.859	724.138	240.965	939.708	174.223	740.504	221.506	549.511	223.497	895.275
Module: blue	Os07g0603900	6.5226	17.4965	7.1161	18.7674	5.5669	17.7373	8.2321	18.8072	6.3042	20.2064	6.1573	17.5085	8.6593	19.3239	8.326	13.4816	9.4578	10.9871	11.2487	18.9732	7.4536	15.2307	10.2751	17.8224	11.8993	19.2157	12.0715	24.59	11.5237	26.7962	11.481	14.37	11.1002	13.4051	10.8917	17.2763	11.2432	44.1181	9.3355	30.6746	10.0858	56.987	10.7237	43.4112	10.1788	26.8233	12.3049	42.3614
Module: blue	Os02g0829800	3.0322	9.4592	3.5776	10.5749	4.2263	8.9998	4.0922	11.9144	3.4546	11.3918	3.0137	9.593	4.0455	10.7215	2.9572	5.136	3.5119	4.7559	4.9427	9.3239	4.8725	9.4989	4.5131	8.6053	4.4152	7.2131	4.6754	13.5532	3.9335	15.3496	4.4856	4.7872	3.9722	4.9946	5.9475	9.5484	3.9752	21.7861	2.8449	20.5057	5.6801	39.7079	4.7005	27.9985	2.9281	19.5746	7.1375	27.4636
Module: blue	Os02g0236000	19.0774	55.1949	14.6134	49.6446	13.5072	57.2583	19.8113	54.3978	15.5488	60.5631	16.394	57.1427	17.819	66.0435	12.5236	55.8123	13.3601	54.456	14.8308	60.2063	12.9768	42.9336	17.09	62.2676	22.888	56.6268	18.0974	58.002	21.3632	61.9876	18.554	35.3165	17.3997	21.5024	19.3059	50.0954	17.9783	86.8796	10.9127	65.3854	14.7436	98.7048	15.1189	95.454	15.9225	46.3698	15.7129	94.5942
Module: blue	Os01g0276200	7.9797	37.8033	12.1767	38.3665	8.4102	33.5413	10.6978	38.5286	8.3617	43.0392	11.0682	36.2385	9.607	47.3293	8.3707	32.447	8.537	31.5356	7.5901	38.6743	7.6393	37.7106	14.1709	43.6011	16.2808	28.0643	11.5405	37.7204	18.6478	41.562	17.2585	16.5194	13.3023	14.9991	14.2323	28.7455	12.5883	50.0448	7.2438	42.7235	13.3467	73.1817	8.7292	51.436	11.9276	30.4339	12.4218	63.0775
Module: blue	Os05g0274900	81.9487	168.251	64.2273	160.277	85.4729	172.93	84.3899	165.635	68.988	156.29	66.8984	152.727	97.062	216.083	78.0455	175.475	90.625	135.98	84.113	180.398	91.1357	176.133	96.2745	184.099	96.3174	140.853	97.6332	193.626	109.54	185.814	96.6189	109.05	103.39	98.0641	106.501	130.54	86.448	239.262	84.1727	210.887	103.101	391.858	74.1822	310.204	83.2703	213.802	87.1793	295.268
Module: blue	Os07g0180900	98.6822	226.126	87.4266	242.993	111.091	268.893	115.758	231.404	93.233	267.159	80.5685	245.214	121.962	254.119	121.736	199.789	144.22	181.915	137.382	233.362	125.283	200.108	164.294	248.331	160.954	226.361	140.502	349.083	160.72	345.855	172.855	179.999	147.708	146.686	152.903	225.013	131.127	494.808	121.08	395.849	144.028	717.617	122.254	582.317	142.03	374.96	152.345	582.692
Module: blue	Os04g0349500	187.413	403.021	161.566	461.491	236.239	414.04	215.356	403.974	173.525	466.931	151.665	413.361	253.782	488.638	240.329	394.37	232.498	323.55	231.485	435.681	230.969	382.263	262.924	422.42	273.341	383.249	257.04	526.193	293.988	501.327	284.942	338.867	256.401	257.878	270.331	393.455	230.113	691.104	209.64	670.452	249.14	1085.2	212.86	818.231	239.969	564.272	226.088	841.202
Module: blue	Os03g0577000	153.465	311.839	131.394	330.559	168.98	346.407	174.445	337.858	131.681	350.392	123.921	325.453	180.845	356.894	171.899	261.91	181.832	224.647	159.007	285.323	158.067	255.659	208.395	320.719	212.483	293.959	204.822	428.658	232.464	416.114	223.823	231.042	211.415	204.264	229.923	296.739	182.431	496.881	166.881	458.626	192.435	688.374	158.696	607.292	178.079	476.226	187.173	657.211
Module: blue	Os02g0175600	89.4469	236.498	85.101	275.347	100.12	262.649	103.435	261.693	78.9181	259.48	79.3382	270.336	121.173	242.92	109.968	191.219	139.52	161.931	117.931	196.75	105.923	207.904	145.483	206.516	134.365	200.733	131.37	299.246	130.053	288.027	155.184	180.665	145.697	144.781	126.463	221.901	119.201	451.653	119.357	391.92	143.875	619.151	118.663	516.302	119.59	435.952	132.153	500.797
Module: green	Os05g0491500	33.3654	42.1867	32.2678	39.3825	33.3618	26.5869	33.5751	44.3865	33.2586	35.4958	36.315	28.2065	23.3907	22.2859	25.1716	27.5371	28.7151	24.829	21.7591	25.2352	23.4793	24.5081	25.0607	19.6492	34.2237	18.5001	34.9035	15.6236	30.5473	17.1669	29.6338	14.7235	30.7214	15.0728	32.6231	17.3128	28.5573	16.3091	25.1641	12.6869	26.3202	19.3314	26.2287	20.3069	21.8543	20.3306	28.9051	17.73
Module: green	Os10g0330300	22.573	26.0694	23.9066	24.2342	20.7302	18.9678	23.8076	25.9466	19.1813	24.3201	23.8334	20.3834	17.7638	12.5805	18.5019	11.6486	16.5941	15.0855	14.7997	14.2596	14.9458	12.5566	16.6272	13.8254	20.8425	13.0374	18.9146	12.3662	18.5862	13.4043	18.2018	10.0608	18.7303	10.3722	20.5489	12.9287	20.2846	11.2613	18.3633	11.6676	16.8239	15.0726	18.7536	12.1811	17.8622	11.9192	20.5539	15.1624
Module: green	Os01g0838800	11.5594	17.1911	13.4234	15.869	10.0763	10.7872	13.4608	16.206	10.1986	13.0201	14.0984	12.0456	10.0505	6.1267	8.4563	7.4903	10.1096	5.5743	7.0814	7.6007	7.3661	6.8134	9.1864	7.362	9.0353	6.1279	10.458	6.2664	11.8413	6.0373	9.2871	4.8617	10.8089	3.9466	11.5698	6.3103	13.7319	4.8731	9.7981	2.9419	14.3397	4.5402	11.9884	4.0173	7.7192	4.9727	13.1081	6.1206
Module: green	Os07g0621500	6.4564	10.5383	8.8197	8.8537	6.9396	6.1836	8.1491	9.4079	6.4787	8.622	8.3632	6.5767	5.5889	4.8904	5.8636	4.6017	4.8204	4.4155	4.8502	4.6746	5.6042	4.1309	5.5306	3.7007	8.3861	4.6437	6.9175	3.8405	6.9699	4.4762	7.4161	3.8404	6.0158	1.7844	6.9475	2.9157	6.9725	5.0951	4.3945	3.7116	6.758	3.1402	8.1644	3.9335	5.4801	4.9726	8.9021	5.3582
Module: green	Os08g0564750	125.948	174.135	143.401	150.924	119.069	124.772	124.867	168.385	121.626	138.637	148.025	137.234	133.707	87.1646	120.942	77.2429	142.936	77.4054	144.445	82.9725	111.633	79.9921	115.159	75.4082	111.786	64.7468	119.247	84.0888	113.011	69.6596	115.755	60.7558	126.559	46.8355	120.325	90.5037	116.922	60.026	123.734	59.0811	127.106	76.3667	118.373	105.177	118.208	93.9072	143.419	69.4975
Module: green	Os02g0780550	35.4228	34.1312	35.6001	31.8227	28.6998	20.9493	32.0426	29.3174	30.8854	27.497	35.0001	21.5867	22.3507	22.4565	17.3574	22.074	20.2524	20.8043	28.0159	23.0225	19.4458	20.2864	21.0086	18.6135	25.0841	16.8062	24.9118	14.907	21.399	12.9085	26.1214	10.1755	21.4902	5.0197	22.2092	8.9179	23.7388	14.9006	16.4659	12.5326	21.6488	18.3702	29.288	19.0618	19.1005	14.9544	25.9906	17.4087
Module: green	Os02g0273700	14.4857	23.1037	19.7034	22.053	12.9031	14.7475	14.0771	26.3775	14.7934	20.323	17.478	17.5139	14.6588	9.1098	15.5821	10.4692	12.2643	10.5802	14.5406	10.6659	15.4727	8.5016	14.3987	7.2298	17.1519	3.9471	18.1882	5.1904	18.6547	5.4035	16.9736	4.7328	18.1638	2.3523	15.8278	5.3953	16.627	4.6357	12.3348	3.3249	15.7811	4.5396	14.9209	4.9642	16.2117	6.5574	16.9408	3.7015
Module: green	Os05g0467600	1.14	1.8512	1.3852	1.7464	0.9917	0.6549	0.9332	1.5124	1.0557	1.3046	1.2345	1.3013	0.8864	0.5309	0.7366	0.9649	0.5259	1.2311	0.5563	1.0597	0.4384	0.3137	0.9107	0.7293	0.9968	0.0724	0.9384	0	1.129	0.0245	0.8899	0.2584	0.9304	0.0567	0.9594	0.1762	1.4388	0.1712	0.6242	0.0312	0.8202	0.0662	1.062	0.1541	1.0291	0.3113	0.9018	0.262
Module: green	Os09g0134900	10.4871	14.9829	11.6336	12.8944	10.4944	11.4377	12.5887	13.5724	10.5884	10.61	10.9819	11.0472	9.1956	6.6173	7.9116	7.5207	9.3162	8.6799	8.8053	7.9423	7.6661	7.5754	8.5601	7.1458	9.8225	5.5196	9.2782	5.3729	8.8912	7.0666	10.0553	5.6928	9.0645	3.9244	9.4184	4.2216	11.4806	7.1153	7.5467	3.9251	8.1374	6.5904	9.6369	6.5919	7.5298	6.1132	10.6461	5.5606
Module: green	Os09g0456200	49.5444	46.7695	53.6517	43.8964	41.4816	30.429	46.6119	47.1925	46.0159	38.1838	58.0155	25.6335	45.6593	20.7233	60.8667	17.1912	38.7495	13.8727	31.6855	18.2826	39.2997	16.0021	33.8988	12.0008	43.4715	16.5009	44.5531	13.3206	51.9017	15.5323	41.9024	17.3046	41.9105	6.8292	43.8311	10.8139	49.3857	13.7945	37.4249	9.2642	48.9619	19.9287	49.718	18.8386	54.3902	30.1011	51.1816	17.4829
Module: green	Os02g0591900	23.0517	23.8919	25.4309	19.9823	16.9891	15.1917	19.5887	22.393	20.3205	22.7031	26.8339	17.8395	17.008	16.3603	17.0077	13.7574	16.806	12.0207	17.6672	13.7328	13.9921	11.2348	16.4158	12.6921	17.3801	5.3889	15.1916	7.1505	17.6312	6.6697	17.8868	5.1493	15.7087	4.4977	18.0416	4.8234	15.9495	13.113	18.5817	10.2909	19.3051	10.2199	18.3935	10.5191	17.1484	7.2389	17.9533	11.6168
Module: green	Os10g0412600	13.3849	12.6836	15.7924	13.1816	11.7471	8.869	14.26	13.3121	13.9733	12.3219	15.8966	10.4738	9.9816	3.2127	9.8839	3.5443	10.2833	3.1634	10.3745	4.9097	9.9533	4.1655	9.3184	3.3251	14.1239	5.8387	13.2319	4.0919	10.4587	5.9518	11.9052	5.0897	12.6774	5.1344	10.3769	6.1146	13.4937	8.4725	11.1882	6.3996	13.784	6.7681	16.83	6.6993	10.1233	6.368	15.5126	7.4618
Module: green	Os01g0871200	111.392	175.465	141.66	186.425	151.405	112.147	117.066	174.106	140.011	164.843	128.465	114.646	63.7821	67.9143	79.3143	83.4773	84.3668	73.6995	63.2324	69.4161	72.8835	70.8006	73.9817	42.3374	133.187	37.7413	126.071	33.9454	112.775	29.8323	100.397	32.6465	118.059	28.9245	102.844	41.0274	119.965	31.8496	71.1016	33.5271	112.119	27.4588	120.371	32.8109	76.1258	33.8881	111.697	32.9688
Module: green	Os05g0148000	12.9196	12.5234	13.2778	12.8078	12.342	7.8493	11.783	12.152	12.0985	11.4671	12.2564	9.056	8.8798	5.2729	9.343	5.4339	11.5348	6.4231	10.4381	5.6672	8.4168	4.5577	10.5808	4.8082	13.3333	6.0802	10.1613	7.0549	10.69	7.5718	10.1582	5.6508	8.7585	5.6839	9.7506	4.6383	12.8314	7.7452	9.7815	6.4389	10.9674	6.9906	14.9608	6.1378	9.4297	6.9537	14.5529	8.4006
Module: green	Os11g0180300	6.0654	7.5999	6.5503	6.0429	6.055	4.7148	6.8348	7.3063	6.2046	6.3187	6.8532	5.8549	6.2314	2.5133	5.6406	2.5893	6.1252	2.7205	5.2266	3.3146	5.7422	3.1573	7.4021	2.6072	6.9446	3.2361	6.429	2.9822	5.9986	3.9537	8.1318	2.9342	6.4249	1.5461	5.8099	2.1624	5.3421	4.1734	5.0736	3.4053	5.9315	3.9718	6.9817	3.3693	7.4413	4.4357	8.301	4.9286
Module: green	Os01g0717700	130.754	168.685	128.717	141.711	77.6762	81.7554	125.508	193.049	102.37	133.797	136.548	112.581	80.361	80.5094	62.3076	46.1254	41.3736	36.3681	73.2079	58.1317	62.6862	58.4285	84.4407	79.7734	86.4588	24.0361	95.3472	28.4872	84.6131	17.0871	96.6946	12.729	83.3288	5.3552	79.8588	23.4901	65.9318	16.4822	42.6691	14.8211	49.4637	11.9602	57.9703	27.4048	87.9499	13.2061	76.6251	25.2451
Module: green	Os10g0382400	28.2422	28.087	32.132	27.9175	26.4192	19.4484	28.3685	28.2245	29.9753	29.9018	33.283	22.7484	26.877	12.226	27.168	12.9227	28.4049	14.2027	28.7488	14.657	25.2263	13.1429	31.0881	11.3386	31.5148	15.8775	27.9263	16.1621	24.8444	14.8119	26.7976	14.1854	22.2544	12.6519	23.3424	9.4982	29.5207	19.3735	22.1353	18.3711	31.419	19.7537	34.8457	19.0279	34.5697	16.7744	36.5938	20.14
Module: green	Os10g0376200	41.5428	43.1184	38.3595	33.0114	29.3071	23.8357	36.3465	37.4787	33.2283	28.7526	39.433	25.5726	32.5237	22.0214	25.3645	21.6235	18.5323	20.119	25.3595	26.191	30.2499	23.4141	34.3581	34.2622	26.0593	7.99	26.3987	7.3403	30.9114	10.5493	24.7138	5.6116	21.4614	3.4517	29.2486	7.9841	22.7842	12.1809	17.4407	5.8333	21.8188	7.081	25.4041	12.2355	32.5586	8.5677	29.3551	16.4353
Module: green	Os02g0477300	25.3165	40.7617	28.9964	42.1118	28.8338	30.7166	30.3378	42.3065	25.1156	35.8898	30.8431	29.6433	28.6909	16.4133	27.6434	19.1596	30.1929	19.3079	31.8935	24.8234	23.6354	20.4531	32.993	15.8954	36.1148	19.6412	30.2485	22.4631	31.7106	22.1553	34.9678	15.9342	30.9454	14.0254	31.851	12.1165	39.6133	17.5576	27.8549	12.8991	38.9448	27.5524	37.8572	21.4086	32.2764	17.6261	47.4587	25.6215
Module: green	Os05g0399100	118.067	183.512	116.997	189.833	103.944	121.134	130.138	189.049	112.618	174.806	119.927	123.064	103.673	141.85	82.9397	126.488	62.688	89.5114	77.7166	118.222	81.1078	121.044	98.8118	110.379	94.7759	45.8316	99.7406	52.4451	103.868	48.1477	109.105	42.4215	101.266	21.2509	102.833	45.369	88.9055	56.1383	66.1038	56.3228	82.03	47.8075	79.5997	49.6228	87.501	47.1274	81.8816	57.1615
Module: green	Os08g0451400	21.0042	20.4607	23.5199	20.808	19.6724	16.5494	19.9716	20.975	21.8706	19.8806	24.5267	17.0639	21.3465	17.6966	21.6669	19.6834	16.1326	20.5154	20.1044	18.9905	20.9676	17.4031	24.4833	16.3098	21.2681	13.8061	19.1369	10.5173	17.2627	13.0148	20.1919	12.9393	15.7189	10.4207	18.3912	9.0721	22.0369	12.9133	17.4492	10.3965	18.8034	9.0652	19.8431	8.019	25.5553	9.7261	19.9818	11.3122
Module: green	Os03g0700800	12.4252	12.9228	14.7183	12.8644	11.3746	7.7275	13.3754	12.2486	14.225	12.0092	14.684	8.1974	9.6747	9.724	10.8636	10.4346	8.1345	8.4877	10.8051	10.7747	10.9648	10.591	13.0506	9.2501	13.0514	6.8649	11.4305	7.1735	11.0432	7.1895	10.8957	4.2972	9.1454	2.2184	9.7322	5.2695	10.9457	6.4951	7.2607	4.8859	9.0139	4.5696	12.3973	4.8109	12.0195	3.2333	11.8028	5.5166
Module: green	Os02g0745200	1.2606	2.0081	1.6754	2.0375	1.0483	0.9402	1.3449	2.1466	1.6459	1.5712	1.613	1.3852	1.6195	2.3128	1.8817	1.9173	1.2215	1.8431	1.9382	1.9153	1.8966	1.3893	1.8987	0.8172	1.6282	0.5856	1.5823	1.0095	1.5879	0.8136	1.2851	0.6114	1.1259	0.2413	1.1213	0.4286	1.7096	1.166	0.8764	0.372	1.4827	0.6014	1.9998	0.656	1.5934	0.6506	2.3039	0.6694
Module: green	Os02g0226000	24.8316	33.9771	22.5738	29.7577	20.2703	22.3335	23.9476	32.5101	21.1988	26.0579	27.2426	24.6457	19.9635	20.8442	18.8803	19.0376	19.1063	18.8955	15.8644	22.4197	15.9427	14.3449	19.0328	16.3759	25.3248	12.6041	23.6987	16.2806	24.1462	13.0887	24.1706	9.0073	19.8721	8.209	24.9017	14.5839	22.7252	12.9989	20.3603	9.952	19.5462	16.9535	18.8463	17.6114	15.6263	11.8849	22.7558	19.6413
Module: green	Os04g0164300	8.6945	8.0043	10.0919	9.0927	9.1851	5.556	10.0374	9.7729	8.3441	7.2836	9.9026	6.9387	6.3877	4.5686	6.2002	6.4555	6.8449	5.9229	6.4725	5.6745	5.5702	4.6217	5.8331	3.207	8.5531	4.2488	7.5946	4.7475	6.166	2.7403	7.1603	3.4105	8.363	3.1692	6.9102	2.9195	7.7169	3.5455	5.4753	3.1453	8.4259	2.0115	9.2128	3.2981	5.1897	4.5723	9.3315	3.1843
Module: green	Os11g0523800	69.3121	69.7081	65.1854	66.7164	56.9486	38.3846	66.5288	69.5768	56.4225	58.1	63.4029	43.2832	48.5392	48.0114	51.2694	46.9168	36.8459	44.458	50.5921	55.9894	48.5664	46.528	57.1071	44.0902	45.6583	31.4673	44.1628	32.408	45.0528	28.6193	43.2824	23.6305	33.6912	18.5377	44.0042	24.5628	44.549	24.5543	31.5483	19.6178	35.419	17.8384	46.7396	21.3187	52.988	20.6041	44.1751	22.827
Module: green	Os09g0429600	7.2063	9.7382	8.1336	8.9331	7.1585	6.3145	6.9584	9.28	7.0201	8.5235	7.3586	6.5883	7.028	2.4879	8.0548	3.4625	8.4139	3.4558	7.3683	3.3039	6.3248	2.7506	8.2745	2.7279	9.528	3.9898	7.9671	4.7377	9.1967	4.7847	8.8108	3.332	7.0233	2.082	8.2759	2.9932	11.4208	5.4613	7.6508	3.1374	9.5171	7.2338	11.4979	4.7425	9.0312	4.5147	12.0939	6.7392
Module: greenyellow	Os01g0229800	0	12.1063	0	18.8451	0	20.681	0	12.3331	0.1062	23.5225	0	21.3932	0	19.6311	0	18.0896	0	12.3359	0	11.4557	0	26.9473	0	40.0372	0	22.724	0.1227	120.937	0	58.795	0	28.3573	0	16.8607	0	70.7718	0	10.7133	0	11.0179	0	16.8858	0	8.061	0	10.7334	0	53.6339
Module: greenyellow	Os04g0319700	0.6331	3.107	0.4324	4.7535	0.6361	4.2137	0.6325	4.1681	1.1131	5.036	0.4967	5.6624	0.2209	3.1189	0.2404	4.2827	0.156	3.6936	0.2641	2.7525	0.103	3.6862	0.2152	5.0357	0.192	10.4187	0.4043	34.8183	0.4355	19.4752	0.2652	10.1214	0.0959	6.9347	0.1473	24.8865	0.1966	3.1599	0.0991	3.971	0.0282	7.3895	0.5272	4.8272	0.3053	3.9896	0.2047	12.7241
Module: greenyellow	Os08g0550200	0.5348	1.2122	0.284	2.2232	0.4031	1.9115	0.7615	0.9977	0.2553	1.4937	0.1595	3.3516	0.5066	1.3479	0.1378	0.8425	0.1002	0.9673	0.5829	0.3399	0.3032	0.8218	0.3208	2.2922	0.6677	3.9818	0.5014	16.8909	0.0538	7.5072	0.5169	3.3396	0.513	2.5379	0.473	9.4528	0.1578	2.3055	0	1.1277	0.0452	1.2832	0.2116	1.7757	0.2205	0.6226	0.1438	3.3766
Module: greenyellow	Os09g0329200	0.0996	0.9457	0.5091	0.7154	0.0667	0.949	0.07	0.4371	0.0634	1.7086	0.1979	2.4325	0.8173	4.4612	0.821	1.7985	0	2.6337	1.1839	2.2779	1.2657	2.5704	2.2358	4.3799	0.0638	3.8125	0.3295	15.4923	0.1335	7.741	0.1887	4.145	0.1274	2.929	0.1101	9.8181	0.0979	1.0016	0.0987	2.13	0.0842	0.904	0.1167	1.0519	1.3383	1.1039	0.1275	3.9354
Module: greenyellow	Os06g0349700	1.2366	2.0653	1.0367	6.2795	1.2753	6.3703	1.27	3.0355	2.2987	5.8099	1.1644	9.9897	0.3699	3.3588	1.6435	3.0348	1.3107	6.5318	1.3543	3.3089	2.1466	8.4809	1.0811	11.3052	0.7501	12.1838	2.8	39.4493	1.276	22.817	1.073	8.3481	2.2165	5.9063	1.1872	26.9548	0.9919	1.2626	0.1613	0.8354	0.5504	3.7565	1.0585	1.6699	0.7456	1.1365	0.8249	7.968
Module: greenyellow	Os03g0804900	0	15.7736	0.1505	15.805	0.0641	14.9007	0.1345	20.5713	0.0609	21.091	0.0317	28.8178	0.3624	15.9168	0.1643	12.3342	0.1194	10.789	0.0316	13.2501	0.0329	12.9721	0.4413	33.9812	0	32.9598	0	77.6646	0.0962	50.3518	0.1087	29.5389	0.0918	13.0057	0.1057	60.6882	0.1567	8.2004	0	5.4365	0.4044	11.8673	0.1401	9.8155	0.0876	22.0566	0.049	21.405
Module: greenyellow	Os10g0165300	0.3475	10.6272	0.2523	13.1126	0.0537	13.5204	0.3383	7.2736	0.2551	18.7643	0.0797	15.3299	0.3544	7.3774	0.2204	7.8477	0	7.2046	0.2648	5.6389	0.3305	8.2465	0.5673	15.2536	0.0257	35.0221	0.3538	128.106	0.1881	91.3487	0.3647	45.061	0.0513	17.8009	0.2068	101.872	0.0263	21.4305	0	10.8304	0	18.892	0.094	19.079	0.5878	9.0675	0.0205	57.3315
Module: greenyellow	Os11g0126800	0.0339	35.8769	0	48.3124	0.1021	23.2007	0.0714	44.8898	0.0323	67.9488	0.0337	46.22	0	28.0419	0.0349	20.5265	0.0317	7.192	0	29.1808	0	25.1013	0	40.3717	0.0325	68.2172	0	170.727	0.0681	121.054	0.1155	56.9787	0	30.2788	0.0374	135.284	0	24.671	0.0336	16.0197	0.0573	55.2077	0	49.9821	0.031	21.4568	0	167.077
Module: greenyellow	Os05g0515600	1.262	13.7916	0.9307	16.7584	0.9511	23.594	1.1231	12.2045	1.3553	19.3951	1.2543	28.1924	6.3129	49.1771	4.3901	42.3943	0.628	33.8263	13.1687	32.5313	4.9589	43.7296	9.2805	89.4994	0.2273	27.853	0.5655	305.991	0.2379	135.306	0.6278	52.1157	0.2648	37.5621	0.436	115.148	0.0388	19.6085	0.0782	24.3699	0.1668	23.5295	0.1387	19.9393	3.831	7.3459	0.2423	54.4761
Module: greenyellow	Os07g0201800	0.0743	5.4885	0.2193	5.9137	0.4482	3.8017	0.2744	5.2212	0.2129	5.8221	0.0369	7.5413	0.8098	4.5949	0.4214	2.4359	0.1044	1.6917	0.5156	1.8425	0.9195	2.6046	1.132	7.0436	0.0357	7.7491	0.164	18.7321	0.0374	9.4724	0.1268	5.7715	0.1783	2.0425	0.2466	13.3052	0.0365	3.2049	0.1106	2.7263	0.0314	3.423	0.0327	2.9172	0.4088	4.451	0.1142	11.7344
Module: greenyellow	Os02g0271600	0.024	1.0258	0	1.8721	0	5.173	0	0.9218	0	3.4435	0.0239	5.0219	0	1.9874	0	2.2986	0	6.4134	0	2.7758	0.0247	3.3337	0.0664	6.6049	0.023	4.2374	0	12.8187	0	7.8434	0.0273	3.1188	0	2.1179	0	6.8155	0	1.207	0.0476	1.8042	0	0.6537	0	1.811	0.022	1.9158	0	2.1435
Module: greenyellow	Os11g0306400	0.0819	43.2111	0.0483	60.6719	0.0823	53.0317	0.3454	39.8456	0.1172	100.882	0.1627	75.0054	0	33.4074	0	45.3455	0	42.0375	0	55.5667	0	104.921	0.0378	142.348	0.0786	132.536	0	722.681	0.4116	403.652	0.3724	301.218	0.1178	105.582	0.2263	687.398	0	122.531	0.4059	102.908	0.1385	266.848	0	137.894	0	265.987	0.0943	445.992
Module: greenyellow	Os11g0307300	0.0347	69.0396	0	86.5557	0.0697	62.9714	0.183	54.8389	0.1325	124.332	0.2759	79.6577	0	49.5622	0	63.4137	0.065	52.3627	0	50.4591	0.0358	89.8428	0.032	117.819	0.0667	215.119	0.0766	651.903	0.1745	413.495	0	244.933	0.0999	100.891	0.2302	599.939	0.0341	153.744	0.0688	121.347	0	186.297	0	191.639	0.0636	135.572	0.0533	402.3
Module: greenyellow	Os07g0643800	1.1043	35.0068	7.2591	31.0342	1.321	99.9277	1.6638	30.064	3.2125	65.2551	4.1289	119.975	2.7891	35.593	4.0107	54.2064	4.1865	120.21	4.116	34.2189	3.7395	53.7166	8.6861	93.1173	5.8582	222.488	4.4083	396.021	5.7096	337.726	6.8159	147.317	3.5815	114.087	11.1617	341.984	3.6192	124.679	7.2994	49.8485	3.8689	79.7955	3.1895	93.3279	6.3127	74.5963	3.0697	155.311
Module: greenyellow	Os06g0302000	0.0299	10.1435	0.0353	35.498	0	22.3537	0.0315	15.4828	0.0856	30.2193	0.1188	37.1801	0	36.0896	0.0308	36.8036	0.028	34.0799	0.0296	61.0913	0	87.4913	0.0276	134.423	0.0574	18.0588	0	446.424	0.1503	162.417	0.102	91.21	0.1721	66.1975	0.0661	317.403	0	48.7531	0	70.8694	0	99.7541	0.0263	71.053	0.0274	67.5594	0.0459	308.914
Module: greenyellow	Os09g0491100	0.5993	2.9941	0.101	3.1051	0.4589	5.2415	1.0234	2.7874	0.5449	4.3451	0.312	5.9417	2.3248	3.6992	1.059	1.5106	0.4812	1.8317	0.9897	2.249	1.1766	2.5611	1.4485	7.7579	0.5482	4.4319	0.8185	24.4565	0.7173	11.2585	0.5192	8.2846	0.2464	2.5186	0.5995	25.159	0.7577	4.4292	0.1415	2.3026	0.7241	5.4414	0.1004	6.2455	0.9939	8.591	0.1754	15.3822
Module: greenyellow	Os05g0226900	16.7336	65.2405	17.5587	65.779	20.0188	102.607	22.0972	79.6215	29.1965	107.638	25.3562	171.947	25.8849	151.234	32.9034	133.654	13.8746	242.725	52.661	214.944	40.6062	244.226	42.0217	229.269	15.5108	138.298	19.2902	394.089	21.7531	141.338	23.1976	96.6425	21.8744	58.294	28.166	126.337	18.6107	72.5306	12.6136	45.4576	9.4536	69.1559	22.0043	82.0237	30.5435	157.278	13.4589	81.3694
Module: greenyellow	Os07g0201500	4.2838	5.0372	2.9927	8.4465	6.1169	4.587	4.8153	4.2679	6.026	5.3093	2.633	3.7718	6.0327	3.1117	3.4276	4.0488	2.7453	4.6042	5.1938	3.9401	6.6225	3.3951	7.0739	6.8025	3.4104	7.7936	5.2227	24.6083	2.5501	15.3372	2.8839	10.0833	4.1634	5.725	4.2996	18.8413	2.4385	4.2118	1.7884	4.3407	3.2891	7.9684	2.527	6.2949	3.9773	5.5306	2.9007	13.5403
Module: greenyellow	Os01g0713200	10.208	341.354	24.3995	318.699	7.3393	432.533	14.1075	311.958	8.442	516.904	12.9445	404.072	41.9245	559.837	77.7745	585.142	27.3644	488.235	27.0291	581.31	60.2669	622.436	33.0914	532.201	18.931	799.127	13.444	1714.35	10.6608	952.092	25.514	1179.41	23.4256	197.075	26.8508	1409.6	21.0686	209.025	48.5996	113.755	15.1445	41.7726	7.3102	350.545	49.8774	221.571	12.4032	82.932
Module: greenyellow	Os07g0684900	0.0807	10.821	0	9.1967	0.1217	14.248	0.0851	9.3897	0	11.538	0.2006	13.8044	1.6438	34.1009	0.5408	26.3472	0.2646	21.7127	2.2395	41.8594	1.1647	26.941	0.7822	35.9637	0.3489	23.1816	0.4007	38.2418	0.3246	30.3326	0.2295	17.3697	0.3872	12.7017	0.4908	18.3868	0	12.1216	0.4402	15.7634	0.6827	15.9661	0.2838	13.7664	0.3329	12.0823	0.496	11.809
Module: greenyellow	Os04g0611700	0.0233	1.0868	0.165	0.6698	0.2108	0.3076	0	0.3069	0.4005	0.3574	0.139	0.4951	0.4857	2.1818	1.7297	2.0267	0	1.3327	0.8314	0.6221	2.234	0.7736	2.2799	1.6036	0	0.595	0.0771	6.6035	0	2.5167	0.0265	0.708	0.0671	0.815	0.0258	1.9305	0	1.0383	0.0924	0.7693	0	1.3603	0	0.7035	1.1961	0.155	0.0537	4.7377
Module: greenyellow	Os05g0458300	0.9801	2.7015	1.0971	4.1528	0.9091	3.0676	1.1132	3.1989	1.0555	6.1655	0.4496	3.9772	0.6665	8.7161	1.6318	7.3472	0.1177	3.3431	0.8217	6.3561	1.2173	8.1246	0.9044	11.0544	0.7965	5.5596	0.3049	24.3358	0.2021	6.9828	0.2572	2.5871	0.5786	0.2511	0.5001	7.9543	0.2224	2.6361	0.1246	3.5941	0.1488	2.7053	0.243	4.0961	0.783	1.7553	0	3.715
Module: greenyellow	Os09g0555100	0.9479	5.6729	0.6556	4.7305	0.7226	11.8264	0.8274	2.4032	0.5616	5.5492	0.6822	11.6309	0.5263	7.9241	0.0674	8.6503	0.5817	18.0037	0.6801	3.3651	0.4379	6.1879	0.8446	20.4984	0.3453	16.8963	0.2524	40.3069	0.2958	30.1651	0.5203	10.7019	0.9093	4.0819	0.3614	11.9899	0.3857	12.1183	0.1945	6.7726	0.3041	6.9951	0.2873	6.709	0.2995	9.2413	0.226	20.4359
Module: greenyellow	Os06g0626600	0.4062	4.8921	0.8146	3.8352	0.653	5.0472	0.3427	4.2786	0.5815	3.1584	0.8881	5.8239	5.7703	2.1447	6.4048	1.3308	2.0923	2.3223	5.2717	2.581	6.4882	1.8972	6.7089	4.0771	0.5071	4.3198	1.0752	12.45	1.47	6.7829	1.1083	2.262	1.0909	2.5022	1.6613	8.5904	0.7188	1.5758	1.4095	0.8192	0.9961	2.1597	0.964	1.3485	5.3968	0.4728	1.0919	3.1897
Module: greenyellow	Os07g0539100	3.7632	200.249	5.8714	222.041	4.1048	300.144	7.5463	189.578	5.3173	357.802	6.0533	308.252	7.0817	444.494	6.0221	541.778	8.9045	505.034	8.561	439.205	9.7982	497.927	12.9311	564.263	8.322	592.901	8.2747	1201.67	7.1934	699.897	7.9381	590.053	10.8299	105.449	14.862	954.236	10.2239	132.841	26.6832	183.669	14.719	39.6239	5.1362	340.236	7.5778	145.219	6.9791	105.452
Module: greenyellow	Os07g0677100	0.4126	65.6809	5.3066	62.8921	1.7414	54.589	3.1769	31.8318	1.4179	114.296	5.0854	58.3352	2.9312	73.6367	3.8701	92.8182	23.498	67.8445	2.821	54.489	3.2746	76.2874	6.3208	46.2144	98.952	509.884	85.5691	1251.44	64.7153	499.128	95.708	374.023	83.2823	275.577	59.3478	390.9	11.8873	107.617	23.402	74.5239	9.1427	51.0551	10.6641	144.661	6.0879	69.8576	10.5858	38.0607
Module: greenyellow	Os04g0229100	11.0933	12.4196	16.6825	16.2878	9.371	12.8198	9.3601	13.9064	15.3273	16.1865	14.5389	18.0139	25.9293	20.9402	25.309	14.4061	24.0915	12.9012	23.175	20.5036	24.9203	17.1035	57.5001	36.5607	4.5866	14.4786	9.8308	54.1426	6.0112	36.652	4.9169	18.2774	8.5133	8.8285	10.892	45.9416	8.5779	5.5657	19.1646	4.0681	14.9468	8.4375	3.6693	6.0157	45.109	3.252	14.0377	17.6037
Module: greenyellow	Os03g0637600	34.4433	27.7537	27.5137	23.6758	29.1634	30.7042	29.0152	23.0306	34.8932	31.236	28.6895	29.4885	23.9972	25.7924	21.6637	28.116	7.8512	31.9556	33.0026	24.6316	23.7089	42.4561	25.7356	66.5718	19.7626	58.9898	19.8829	114.454	12.9895	65.4213	22.1786	29.8885	20.3747	43.4979	18.046	59.3335	10.3797	28.4827	13.8103	14.5608	5.7297	7.6429	8.5043	56.737	24.8929	27.7758	7.1404	24.5056
Module: greenyellow	Os06g0185500	0.1519	37.9583	0.1344	21.4306	0.1526	39.4524	0.3604	42.3671	0.2537	51.6423	0.3773	43.3071	0.3236	50.2984	0.0783	36.5024	0.4978	58.0775	0.4138	76.0898	0.2739	60.3866	0.2452	84.5234	1.0938	170.232	3.0988	245.613	1.9083	242.778	1.3381	123.716	1.5659	100.884	2.728	207.024	0.4106	91.2648	0.6775	49.4219	0.3853	43.2794	0.3003	112.753	0.1044	84.0322	0.2333	100.316
Module: greenyellow	Os09g0272900	5.4184	13.3218	5.619	12.3481	6.2224	11.4268	6.1991	13.1875	6.8001	15.8065	6.1677	12.3466	2.5225	9.9194	1.4604	18.4014	5.1119	17.9122	2.8338	15.2405	3.1505	17.3209	3.632	12.859	6.6401	18.4752	4.0376	28.8217	3.3634	19.0204	5.3552	12.6648	4.0903	7.7768	4.2497	18.4539	5.1211	8.8606	4.2667	3.1032	4.782	3.7435	7.208	8.5337	2.5488	5.3019	4.8572	10.9499
Module: greenyellow	Os02g0551600	2.8403	7.2775	2.3313	5.5771	2.792	3.5989	2.9957	5.4206	2.5934	4.8017	1.8411	4.7877	1.4036	5.1131	0.9546	2.8791	2.3134	2.8101	0.9789	2.4328	0.6364	2.9602	0.9687	3.7608	1.6604	5.1226	1.9071	17.0635	1.8623	7.6451	2.4572	4.2725	2.8432	1.8506	1.6383	6.2103	1.7606	3.1055	1.7755	4.4155	0.9922	5.2054	2.4968	5.7776	0.5658	9.2419	1.2805	5.1345
Module: greenyellow	Os01g0940700	21.6231	576.232	66.4168	738.406	44.3371	807.482	28.2337	480.516	36.3299	1135.04	24.3065	859.07	38.9957	832.704	46.9988	1086.14	216.615	710.84	24.2703	1060.65	39.8012	1079.74	41.785	576.685	68.7363	1079.05	76.4833	3091.31	101.195	1272.16	76.6135	2149.81	94.6048	557.791	126.36	1598.8	246.457	104.852	410.159	14.9227	250.139	15.9885	112.539	80.0174	53.8158	63.6271	140.469	119.735
Module: greenyellow	Os03g0207800	0.1462	3.7863	0	3.8756	0.0734	7.1263	0.1028	4.1436	0.0233	5.0963	0	5.3304	0.0692	9.0049	0.0251	10.1617	0	10.2625	0.0241	11.5181	0.0502	10.2417	0.1124	10.4963	0.0702	10.7789	0.0269	18.6692	0.0245	17.4313	0.0554	10.4429	0	8.9645	0.0269	10.4133	0	7.0363	0	4.9582	0.0206	7.9938	0	7.1326	0.067	8.589	0	7.953
Module: greenyellow	Os10g0509900	1.2146	1.1537	1.051	0.6649	0.895	0.8015	1.6227	1.5106	1.0048	0.9756	1.2877	0.9461	0.5369	0.0972	0.5008	0	0.6826	0.378	0.1605	0.1029	0.4173	0.0995	0.3736	0.1827	1.3998	1.378	1.5185	7.3338	1.1397	3.0311	0.7366	1.9132	0.5438	1.7528	0.8952	4.0721	0.3981	1.3963	0.0803	0.7424	0.7533	1.8904	0.0712	1.4665	0.371	0.9427	1.3684	1.7457
Module: greenyellow	Os01g0299300	3.1386	3.7354	2.1017	4.2661	2.415	5.4105	2.2665	4.8404	3.3198	5.7603	3.4566	8.199	2.0621	4.1738	2.3023	4.0621	4.3963	7.3579	2.4093	4.5999	2.2147	5.3179	2.7397	6.0594	3.3672	8.18	2.807	12.0162	2.6437	8.4265	3.3435	5.3445	2.9023	4.0489	2.1881	9.0333	4.2258	3.9818	5.9435	1.2443	3.2042	5.0974	4.3497	4.6513	2.8503	4.3732	3.8659	5.7038
Module: greenyellow	Os06g0185966	0.1766	1.0674	0.1852	1.2084	0.138	1.2516	0.0621	0.7967	0.206	0.8812	0.2145	1.4589	0.1673	1.1303	0.3438	1.904	0.2389	2.908	0.2333	1.247	0.0809	1.0854	0.0905	1.3722	0.1696	1.0435	0.1299	4.1011	0.1184	2.6837	0.3123	1.1922	0.0941	0.6861	0.0217	1.0738	0.0772	1.0997	0.2724	0.3958	0.1991	0.0254	0.0517	1.0661	0.1798	2.9043	0.1356	1.0576
Module: greenyellow	Os01g0930500	2.5522	10.5031	2.8655	14.9989	4.2191	8.239	3.2562	11.9254	2.4362	11.9028	2.4548	8.701	5.3025	9.4358	5.9822	10.3231	3.3158	8.4543	2.4472	14.1783	6.8729	13.8649	5.9639	11.2823	3.3208	15.499	3.5871	28.2002	4.5938	20.5054	3.6975	17.4373	3.9488	12.4745	4.5508	23.0754	3.0356	13.8415	4.8978	9.2838	3.3768	15.5896	4.2337	15.966	5.3189	25.672	3.7942	15.2767
Module: greenyellow	Os10g0477900	0.3158	1.0908	0.3105	1.1886	0	1.2735	0.1666	0.9242	0.0502	1.0378	0.0523	2.1805	0.0499	0.6317	0.2713	1.99	0	1.2899	0.2086	1.9401	0.1628	0.6471	0.3886	2.9685	0.1011	1.1197	0.4064	5.0118	0.3175	1.3641	0.0598	0.1777	0.202	1.49	0.3492	1.7907	0.3623	0.2269	0.1044	0.193	0.0445	0	0.0463	0.2383	0.1447	0	0.1617	0.3242
Module: greenyellow	Os01g0248701	1.6427	1.8858	7.7084	3.1038	6.4523	5.2551	2.4413	2.3352	8.3032	3.0259	3.2282	6.305	56.2226	15.8158	37.3241	9.6446	22.484	8.1902	34.4006	7.4969	44.7869	10.8765	70.0388	20.5065	3.4062	9.6092	8.195	41.0076	5.9303	18.6506	2.8864	6.4896	7.6998	5.9675	10.7309	20.0442	13.3247	7.1886	20.618	6.5031	19.7958	5.0841	6.3995	5.2962	50.9075	6.5191	12.818	10.9229
Module: greenyellow	Os03g0300400	36.2618	283.316	50.5631	337.263	24.7843	739.095	44.5159	288.169	34.3889	509.287	52.6568	639.642	56.5919	625.294	46.9605	794.721	172.521	1287.51	66.666	632.356	42.1048	718.415	63.1765	906.494	131.613	1206.76	163.372	2393.12	122.744	1744.83	129.578	1194.14	140.101	878.324	147.272	1381.41	135.091	770.945	198.564	1186.98	99.7648	688.585	106.806	1471.2	51.7334	1045.65	89.7076	710.772
Module: greenyellow	Os10g0392800	0.0969	4.016	0	2.5858	0.0974	5.1149	0.1022	2.7646	0	3.29	0	6.2783	0.2753	9.3031	0.3995	3.1749	0	2.4876	0.192	2.8325	0	1.7867	1.073	12.7871	0	0.4122	0	21.3771	0	3.7666	0	1.1447	0	0.484	0	3.153	0	0.557	0	0	0	0	0	0.1462	0	0	0	0.7461
Module: greenyellow	Os10g0108700	31.7923	3.9891	22.2076	5.7605	24.3807	6.586	27.8284	2.441	26.6886	10.5326	14.8638	9.778	20.9391	2.341	12.6626	4.9595	5.385	5.7506	29.3639	5.5239	23.5958	5.8895	10.2004	12.6604	15.4143	19.2185	19.1765	107.764	8.2229	65.6758	16.5369	29.2818	21.6341	10.9405	9.6096	81.9482	5.3837	13.5725	6.0737	4.8317	1.0708	11.2294	4.5425	11.569	10.4432	6.8865	4.9681	26.9288
Module: greenyellow	Os11g0179000	14.6074	6.3064	9.8607	9.1747	12.6333	11.2688	10.9608	8.2939	13.3192	7.9598	11.5569	11.27	11.3575	11.9487	10.9359	8.4256	4.4244	9.4981	10.6568	7.7587	9.8868	9.9162	7.7123	21.1478	7.6774	14.5317	10.5014	40.8415	7.8909	18.833	7.5193	14.2272	12.1304	7.0184	8.677	28.8071	5.0733	9.5031	3.9631	10.6602	4.6095	11.0279	3.7692	11.8452	7.0594	13.7781	3.126	16.2269
Module: greenyellow	Os10g0392900	0.0707	6.1341	0	6.2396	0	8.9397	0.1491	3.8785	0	5.9616	0	14.0404	0	14.2521	0.1457	9.7098	0	7.5889	0.2101	3.6835	0.2186	5.0399	0.3914	23.1213	0	2.2555	0.3119	26.2648	0	4.5796	0	1.6702	0	2.0009	0	8.4687	0.2085	1.1173	0.0701	0.6481	0	0.3667	0.1243	1.9203	0.3239	0.4702	0	2.0682
Module: greenyellow	Os01g0183600	2.8361	15.5548	2.4584	12.5644	2.937	15.5625	2.6554	16.3547	2.7348	15.3411	3.3653	21.1788	1.3705	5.2791	2.1177	8.4973	7.3456	7.5983	1.7204	6.4367	1.2229	7.3639	1.816	9.0414	3.7799	20.6842	4.3733	27.7555	3.5786	16.7905	3.8498	16.2148	4.9137	10.6491	4.511	21.8725	6.0607	10.9368	7.6899	3.0776	3.6955	4.429	6.2326	8.9097	1.1138	9.6737	5.0236	9.3584
Module: greenyellow	Os06g0311800	0	0.9574	0	0.8599	0.1981	1.7342	0	0.3785	0	0.5937	0	0.4187	0	0.2957	0	2.9809	0	1.7252	0	0	0	0.3635	0	1.2784	0	4.5076	0	15.5638	0	5.1792	0	0.1663	0	0	0	0.2187	0	0.2124	0	0.8132	0	0.1278	0	0.8925	0	0	0	0.3035
Module: greenyellow	Os12g0459100	0	20.1462	0.0416	39.3882	0.0354	4.6159	0.0744	17.3014	0.0337	41.4137	0	5.8819	0.0334	3.8521	0	9.0232	0	1.1525	0	5.5588	0.0727	10.2759	0	3.1031	0.1016	19.3578	0	63.7258	0.1064	28.7418	0	35.2397	0	12.2158	0	55.0385	0	15.9655	0.035	10.9945	0.0895	14.4559	0	28.6386	0	21.4105	0	39.867
Module: greenyellow	Os11g0109500	2.3674	15.9147	2.9262	14.0775	1.6236	9.5459	1.9816	15.9581	1.65	12.9234	1.606	10.0182	1.1389	8.5684	1.007	8.7605	0.8095	8.0245	0.8191	10.4115	0.6197	6.7441	0.5895	7.5866	1.3714	23.4207	1.2435	25.2191	1.02	15.0938	1.0254	14.3957	1.2256	8.3841	0.8308	24.1769	0.8867	6.3716	1.0805	4.9608	1.3029	5.4585	0.991	9.9244	0.7231	5.7493	0.5773	5.6129
Module: greenyellow	Os07g0677200	27.1436	337.967	82.5732	362.421	33.3448	198.768	31.5623	337.765	27.01	584.537	42.0668	292.743	22.5849	200.318	22.8562	276.453	174.503	184.853	19.3732	291.091	20.8482	519.356	50.3529	142.318	229.043	398.262	325.8	1121.97	181.115	399.824	227.693	391.959	288.443	147.233	204.211	467.423	103.862	111.645	127.158	98.884	71.8227	31.751	103.932	201.464	49.8943	121.346	83.091	47.7956
Module: magenta	Os06g0721800	1.2468	14.6235	3.0239	17.9163	0.9048	71.6052	0.7306	15.5825	0.8596	19.4981	1.5146	55.2548	1.837	8.8118	2.9271	18.0693	1.6869	46.3973	1.5099	5.6344	2.1417	12.0061	2.5568	26.4853	1.0644	10.7565	1.7574	12.547	3.2034	10.5709	1.8114	4.793	2.3257	7.7275	2.9865	6.7619	2.2475	3.7824	3.434	10.4148	2.9876	10.6909	1.3396	7.1087	1.5869	9.331	2.0218	5.12
Module: magenta	Os06g0218900	0.9401	9.3347	0.647	13.7898	0.433	42.8175	0.8263	8.7256	0.7852	12.0554	0.3504	32.4937	2.7083	8.0855	2.059	19.3004	0.8071	62.2094	1.2419	6.9199	2.2203	7.8485	2.6025	32.4721	0.4138	14.0816	0.4753	9.5511	1.0633	13.5907	0.9353	6.0156	0.3006	6.8482	0.9094	7.2998	0.5007	9.1183	0.4661	12.7124	0.8613	10.1605	0.6542	10.6407	2.9434	11.5953	0.5115	4.5841
Module: magenta	Os06g0718400	1.1021	8.85	1.6904	10.1241	0.443	47.9951	1.3367	10.3403	0.6838	14.9077	0.8763	30.9628	1.7224	6.0181	1.8175	10.6942	0.9806	30.1584	1.638	6.2333	1.2494	8.3319	1.6781	14.0465	1.4818	8.6743	0.9118	10.4934	1.2742	4.3634	1.5037	3.0689	1.5858	6.8815	1.523	4.9717	0.9753	3.0882	1.803	8.0832	0.7922	4.5741	0.6297	3.0771	1.7674	6.415	1.3968	2.8002
Module: magenta	Os04g0179700	0.1879	24.0667	1.2414	38.665	0.5664	194.864	0.5945	34.4315	0.6098	78.2192	0.8964	185.916	1.3703	42.4362	1.1232	97.0762	0.3344	214.929	3.4253	59.3646	1.3361	101.346	3.6583	126.958	0.2346	36.2902	0.3109	76.879	0.3967	50.1232	0.1709	51.146	0.1802	33.0985	1.7448	28.7621	0.4988	61.6375	1.3599	167.739	0.9692	46.7383	0.5946	46.5879	2.0489	45.1198	0.2309	78.4935
Module: magenta	Os08g0384500	12.0994	60.1726	40.9974	67.9358	11.5838	182.939	11.8358	54.7436	13.4581	99.8713	24.1729	163.278	43.1535	139.624	61.9532	258.564	15.9192	387.644	50.3381	149.007	70.1937	197.065	66.7658	249.601	13.7168	48.915	13.5489	71.1209	17.6618	64.39	11.9474	40.2537	11.8416	47.2569	17.504	30.8724	16.7915	49.1098	22.3749	135.917	18.5493	28.2625	13.1291	43.2948	68.7895	36.4434	14.2146	36.5722
Module: magenta	Os03g0726800	4.0151	17.243	3.3126	16.825	2.8818	37.3822	3.375	17.0277	4.2937	21.9552	4.5007	37.9016	4.0031	8.6952	4.1694	11.1468	4.609	26.1041	3.6193	9.669	3.8892	9.426	4.9866	13.3475	3.5951	13.6142	4.9617	19.5596	4.583	12.9519	4.3592	12.4314	4.5177	13.3708	5.2732	10.2698	4.393	13.0141	4.0409	31.9944	3.5487	11.3547	4.4849	9.7499	4.4817	16.1662	4.4753	10.0413
Module: magenta	Os02g0176900	0.4662	2.2809	0.9778	4.7314	0.2602	18.3982	0.6009	2.9556	0.2966	4.425	0.7722	12.6536	0.7849	1.4297	0.2669	4.2427	0.097	17.4676	0.3592	2.3699	0.3203	2.3558	0.6692	6.7183	0.199	1.212	0.4571	3.6085	0.5207	1.9388	0.4711	1.3112	1.0434	0.8624	1.2597	1.4556	0.713	3.2748	0.6163	5.2234	0.219	2.8886	0.3187	2.6577	0.5221	4.0485	0.8355	2.3928
Module: magenta	Os10g0439800	0	1.9573	0.0775	2.2255	0.066	10.8026	0.0347	1.6944	0	4.21	0.098	10.7129	0.1245	1.4194	0.2032	2.0701	0.0923	5.5972	0.1628	0.7933	0.1016	2.8673	0.0606	3.2979	0.0947	2.7954	0	2.594	0.0661	2.696	0.0747	2.2178	0.0315	3.501	0.109	2.0409	0.0323	2.4549	0.3257	1.5662	0.1111	2.1731	0.0289	1.19	0.1806	2.8411	0.1766	5.0084
Module: magenta	Os04g0507400	0	0.8754	0.0886	1.0406	0	7.5568	0	0.9477	0.0358	1.1104	0	4.7063	0	1.5322	0	2.0348	0.0352	5.2143	0	1.6226	0	0.6462	0	3.9811	0	0.0799	0	1.3952	0.0755	0.5406	0	0.3802	0	0.8128	0	0.1666	0	0.6475	0.0745	1.1705	0.1588	0.3896	0	0.51	0	0.562	0	0.2313
Module: magenta	Os06g0522300	0.2336	11.2451	0.5512	14.2263	0.2739	208.046	0.0411	9.5703	0.1487	16.0767	0.1935	137.298	0.4794	8.5508	0.2408	50.7327	0	183.915	0	4.9484	0.2408	19.5271	0.3234	93.0972	0.1122	28.5734	0.0429	23.2367	0.4306	8.9685	0	3.5482	0.0373	3.2414	0.4304	6.7952	0.0383	15.7771	0.0386	54.0416	0.0988	25.0969	0	16.0412	0.3211	37.8787	0	15.2285
Module: magenta	Os01g0963000	8.5902	34.0595	21.896	72.822	8.7946	718.71	6.0685	32.7703	7.3875	95.6836	15.5855	483.024	31.0865	63.6546	45.8973	349.063	35.2953	926.048	26.6578	84.8705	39.1718	325.903	52.7969	414.608	57.2434	95.158	35.3543	202.59	34.7079	115.155	55.9759	101.96	44.0396	122.859	47.1248	77.1316	36.6132	77.0904	58.3754	443.325	27.071	100.691	22.6894	76.6842	82.8791	95.0149	24.8364	81.4268
Module: magenta	Os07g0533300	0	2.9903	0	5.3666	0	26.8461	0	2.3845	0.0324	4.6856	0	17.9595	0	1.1409	0	4.407	0	19.4535	0	0.6473	0	1.0017	0	6.2421	0	2.2389	0	1.025	0.0341	0.831	0	0.4011	0	0.0565	0.0375	1.8581	0	0.2927	0	5.6652	0	0.044	0	2.9207	0	0.7905	0	0.4183
Module: magenta	Os07g0580900	26.3155	164.932	28.955	128.127	34.0087	449.734	29.5999	161.274	32.0648	183.96	27.6669	410.116	88.9416	119.846	80.0881	162.649	19.5663	312.526	65.812	132.528	93.4363	176.609	77.4372	185.092	23.4713	124.253	24.5812	260.399	26.0233	148.077	27.9028	139.438	25.5602	77.0806	26.5139	112.305	18.8199	175.01	19.2297	277.144	24.9562	140.073	24.2025	152.087	89.98	232.903	23.7766	163.654
Module: magenta	Os01g0389200	0.4281	4.4355	1.1995	6.0413	0.5377	58.904	0	3.9929	0.4597	13.0695	0.6914	43.7638	0.7095	10.7886	1.0479	21.9828	0.2005	23.8527	0.5302	7.0729	0.6618	19.4043	0.9876	19.8562	0.0514	4.553	0.118	4.3492	0.4842	2.2341	0.1825	1.8964	0.0513	3.9202	0.5324	0.7914	0	4.229	0.2122	9.9095	0.181	4.0946	0.1882	4.6838	0.5884	6.1403	0.2877	4.6143
Module: magenta	Os11g0244100	0.0345	7.992	0.0407	21.0171	0.1386	109.826	0	10.8569	0	33.9059	0	78.5411	0.0653	9.4741	0	37.9685	0.0323	90.1493	0	12.3555	0	21.5271	0.0318	37.2098	0	2.9332	0	12.9688	0	8.7846	0	6.4578	0	8.5525	0.0762	4.9968	0	7.1827	0	23.324	0.0292	3.3086	0	2.9655	0	7.2809	0	4.6183
Module: magenta	Os08g0120600	6.4036	97.1889	16.4134	164.351	5.473	606.064	6.4433	102.093	5.691	251.242	9.6931	498.358	24.5046	140.185	25.1862	340.504	31.471	580.921	24.139	134.429	24.6541	327.624	37.2551	296.581	13.8196	52.3731	14.6142	135.374	26.5286	80.906	12.6787	80.1208	13.1683	107.358	27.0965	45.8867	27.5368	63.8829	50.5747	209.726	33.5507	29.9275	19.6694	42.8221	35.3104	48.1674	26.0346	44.8269
Module: magenta	Os07g0123800	0.3772	9.6088	3.6349	16.7135	1.5162	62.9877	0.5305	12.9017	1.0803	15.4251	1.3748	55.2276	6.1336	34.4824	10.0441	54.7483	3.0622	63.5359	4.1114	26.7692	8.1645	43.8213	6.0919	49.2136	1.2076	20.4625	2.4967	20.0026	2.0859	16.2024	1.7871	21.7518	3.1362	24.6011	3.2668	22.969	2.8436	14.7262	2.8052	18.2144	3.4029	13.5362	2.4871	12.6198	6.9715	35.9685	1.0141	16.4588
Module: magenta	Os04g0688100	10.8261	690.15	18.1193	702.876	21.444	2488.19	11.71	525.832	14.1638	560.862	11.1382	1765.42	75.1189	960.617	39.9627	1215.91	21.3815	1948.86	76.8336	1127.62	63.417	1269.24	88.4123	1363.34	20.0968	738.481	17.8173	1146.52	27.8188	765.068	15.298	607.951	15.13	358.735	42.5205	511.17	24.6218	1020.82	21.8798	1797.89	35.3056	900.693	13.3781	845.53	74.2013	910.627	16.1528	795.732
Module: magenta	Os11g0643100	4.018	5.9232	2.5823	14.3501	2.3634	240.258	2.3084	9.105	2.8064	16.7444	2.0454	149.962	2.042	26.3448	0.8754	113.577	0.5201	258.869	3.0424	25.9072	1.5824	88.0614	0.7838	136.435	1.8823	16.1213	1.4413	39.0677	0.9852	22.8094	2.5628	18.689	1.1908	29.7522	2.0224	16.8139	0.6745	16.7108	0.6154	73.2535	0.0829	13.1763	0.8902	6.3597	1.5267	26.2938	0.6273	26.2078
Module: magenta	Os10g0380800	0.0312	8.594	0.6248	13.1413	0.1565	88.5238	0	8.7855	0.0595	12.8633	0.3406	73.1593	3.3046	78.8475	1.3806	101.913	0.3501	157.151	1.9445	68.6151	2.1511	105.501	8.9979	143.497	0.1795	6.7592	0.1031	37.329	0.4071	24.1739	0.2834	9.5685	0	7.4693	0.7232	8.7544	0.245	10.4301	0.4942	83.3951	0.5269	7.3534	0.2738	14.9035	7.194	10.1543	0.2393	12.7603
Module: magenta	Os12g0154700	0.0546	20.8544	0.0644	78.4309	0.6033	205.584	0.1727	16.7708	0.2084	80.8254	0.8137	187.782	0.1551	14.8696	0.3938	52.8945	0.2556	196.812	0	17.4817	0	35.8961	0.6548	79.1696	0.1048	29.6073	0.0602	33.2092	0.0549	13.4374	0.0621	11.6987	0.1047	21.9026	0.5431	19.3753	0.161	46.4319	0.2165	64.752	0.4154	67.818	0.1439	60.9569	0	123.996	0.1258	37.5705
Module: magenta	Os12g0635700	1.2002	10.4786	2.098	9.2165	1.2507	25.0296	1.4534	11.7074	1.5276	12.8051	1.944	20.3033	1.0526	3.6811	1.4203	3.5292	2.0818	9.3892	2.1582	5.9889	1.5119	3.9344	2.1331	8.4233	0.9819	7.1867	1.5691	10.0135	1.5642	5.3759	0.9098	4.1262	1.2367	4.367	1.2777	5.5229	1.4424	8.6235	1.6749	10.1071	1.2782	6.2267	1.6412	12.3442	2.1998	11.2371	1.7072	5.5447
Module: magenta	Os12g0608633	0.1545	1.267	0.0607	2.4309	0.1035	12.23	0.0543	1.1865	0.0491	1.8045	0.0512	7.8202	0	2.657	0	2.1411	0	1.6823	0.051	1.8977	0.2123	1.962	0.0475	1.5679	0	1.2047	0	0.2391	0.0518	0.1482	0	0.1738	0.0494	0.3429	0.0569	0.8377	0	1.5537	0.051	1.8881	0	1.1352	0	0.5439	0.0472	1.9694	0	1.3478
Module: magenta	Os04g0417400	0.0382	4.448	0	4.5432	0.0383	17.1633	0.0402	5.0667	0	5.0989	0.0759	12.97	0.253	6.0908	0.354	5.3858	0.2144	11.8447	0.1134	3.1524	0.5899	4.5031	0.1409	8.3066	0	3.0845	0	4.1649	0.1151	2.5821	0	1.61	0.1098	0.3812	0.0422	0.9595	0	4.277	0.1892	9.4456	0.0323	4.2068	0	3.5129	0.2098	7.2345	0.1172	3.6432
Module: magenta	Os01g0179000	2.0398	67.0558	3.7161	67.6407	2.3209	222.302	2.5942	63.6606	2.3765	66.7268	2.8621	164.18	33.6956	138.021	14.9327	138.843	1.3205	131.158	34.149	143.652	32.8629	137.317	39.8324	150.792	4.1196	55.5133	2.4816	42.7009	2.111	78.7704	2.899	35.892	3.1365	49.1965	2.454	50.0011	1.5631	31.2501	3.0634	22.4953	0.8625	19.8802	1.2129	22.0012	30.1	29.8315	1.2442	20.8322
Module: magenta	Os06g0649000	0.6225	11.2406	9.1598	23.0026	1.0671	84.2072	1.3518	13.9039	1.0487	40.1487	3.1301	75.7311	116.887	90.2691	35.2144	93.08	4.8362	99.4386	56.0574	54.7338	58.7635	69.3686	72.9246	67.8611	2.1101	14.2553	2.3832	21.0049	3.7921	12.6531	2.5815	18.973	2.0375	27.3773	3.684	17.3863	4.8968	12.9974	5.7731	13.0933	4.4595	6.6018	3.5088	10.5558	78.2579	11.6929	3.2347	13.1954
Module: magenta	Os01g0358100	80.8453	308.098	49.742	258.844	55.0647	827.656	60.3609	272.473	60.0658	285.878	49.7024	611.721	41.8387	304.908	34.4326	412.334	8.7822	690.371	49.6853	306.135	38.0101	418.438	33.7127	497.443	30.0165	303.762	31.4878	435.163	21.3671	348.177	32.7723	240.292	38.377	245.285	29.5617	284.043	12.019	188.429	13.4976	301.184	6.0499	170.072	10.135	231.547	27.8779	227.895	10.0828	169.627
Module: magenta	Os01g0644900	0.0634	42.5426	0.5985	41.654	0.1274	88.2838	0	35.4186	0.1816	35.2125	0.3151	71.26	1.5015	70.774	0.3268	77.8326	0	53.4994	0.377	63.1048	0.0654	87.3032	0.7607	60.6501	0.0609	29.8105	0	26.0645	0.0638	17.9847	0	15.4104	0	16.7878	0.0701	16.3194	0	11.0255	0.1257	33.0206	0.1073	16.3663	0	18.0872	0.2324	28.3678	0	9.96
Module: magenta	Os12g0576700	8.8718	47.7222	8.7734	36.0025	7.0854	117.557	9.4112	42.6562	8.7378	38.0538	7.0338	90.4206	8.1115	46.3123	7.5319	62.0401	1.6571	157.625	8.5362	65.2104	5.9195	43.1504	9.441	76.9283	4.7281	36.7626	4.9496	37.6919	3.6348	45.3319	6.443	24.5359	3.8863	14.8148	5.2158	47.8611	3.5296	30.1763	2.0339	46.3097	2.5154	21.0509	2.4118	33.1634	8.882	23.8371	2.8755	15.7543
Module: magenta	Os05g0372900	0.0502	3.0581	0.1778	3.764	0	14.6954	0.2649	2.2051	0.4795	1.9808	0.2497	7.9506	0.3331	3.6777	0.4142	4.5581	0.3294	8.1485	0.4977	3.8948	1.0355	3.7052	1.2517	7.026	0.0482	2.9922	0.1108	2.0999	0.0505	1.2295	0.7997	1.2717	0.0482	0.9201	0.2222	1.4861	0.3458	1.516	0.0996	3.0397	0.1699	3.4532	0.0442	1.8196	0.9668	1.7545	0.1158	2.4755
Module: magenta	Os07g0566800	0	0.4515	0	1.3801	0	18.0732	0	0.6558	0	1.4182	0.099	11.6903	0	0.1793	0.0513	0.6904	0	6.2183	0	1.0127	0	2.2039	0	5.0554	0	0.8475	0	1.2722	0	0.0717	0	1.1767	0	0	0	0.1473	0.049	0.5009	0	1.6437	0	0.8397	0	0.1503	0	0.6626	0	1.227
Module: magenta	Os02g0749700	0.0249	4.1966	0.4999	16.475	0.2755	407.204	0.0263	9.5456	0.0238	8.5447	0.9414	223.786	0.1416	6.9696	0.1028	134.717	0.2568	605.789	0.1235	7.2544	0.1028	21.2022	0.069	244.41	0.0718	37.167	0.0825	74.3196	0.3508	18.3008	0.0567	6.8144	0.0478	7.8022	0.8266	6.9675	0.0245	36.3173	0.0741	184.451	0.2108	63.2956	0.0219	18.7704	0.0228	36.7671	0	34.0059
Module: magenta	Os11g0242200	0.046	1.1914	0.4884	2.8325	0.1849	23.52	0	1.9179	0.0878	3.5263	0.1829	11.1387	0.7406	2.0424	1.6592	2.6662	0.4308	7.4067	0.2734	1.4614	0.8059	1.5831	0.2547	3.7351	0.0442	1.3698	0.0507	1.1749	0.0925	1.8541	0	1.0091	0.0441	1.7614	0.4068	1.1565	0.407	1.5201	0.1824	7.6744	0.1556	1.4317	0.1213	2.0824	0.5901	2.9832	0.0353	1.2749
Module: magenta	Os06g0521500	0.4892	13.1597	0.666	18.8102	0.7941	225.544	0.2381	12.9667	0.1796	18.6301	0.6732	137.341	1.8534	53.2466	1.5514	153.177	0.3172	387.932	1.305	59.164	1.5902	113.613	2.2225	217.911	0.3976	65.6415	0.2906	60.2119	0.681	33.9155	0.1711	11.6222	0.2527	8.1457	0.6656	23.6554	0.666	37.9069	0.2985	115.162	0.5728	53.9321	0.4631	45.4914	1.4829	62.834	0.3758	30.5391
Module: magenta	Os04g0406600	35.928	66.0089	50.9123	70.8758	26.1534	193.82	31.2601	68.4311	34.6219	106.766	43.7232	177.977	88.2282	196.683	69.5037	155.209	39.1917	185.43	74.3109	169.555	64.1742	149.525	111.817	198.295	29.9898	80.3998	28.1261	117.125	29.8918	109.815	38.7259	56.5356	33.0315	55.4158	41.1303	61.7968	27.1829	105.804	49.7919	101.213	28.4355	64.7681	19.7597	111.028	108.045	112.407	26.1376	91.6173
Module: magenta	Os09g0561500	0.1323	0.7713	0.3123	1.6752	0.0443	35.0006	0.1163	1.186	0.2737	1.4978	0.2631	18.4607	0.3969	2.9382	0.3637	10.1451	0.062	36.1103	0.5026	4.7095	0.5228	5.4497	0.8752	18.3095	0.2542	2.4867	0.073	3.5342	0.2217	0.7303	0.0251	0.335	0.1058	0.4407	0.4389	1.1092	0.1084	2.694	0.3499	10.3531	0.2238	3.919	0.1745	1.8641	1.2532	5.4654	0.0678	1.9699
Module: red	Os09g0344500	9.5717	0	55.4666	0.0363	28.8894	0.3496	14.5655	0.2713	25.6568	0.5416	31.6292	0.4127	18.8342	0.3815	32.4355	0.4451	751.881	0	30.2009	0.1347	27.3378	1.042	45.5327	0.4382	266.176	4.8836	403.548	2.2146	508.671	14.6448	235.369	24.0816	261.94	4.1755	461.34	13.1646	634.44	5.4306	1003.12	4.0152	588.463	8.9327	523.907	2.1855	38.1932	3.1132	434.802	3.0458
Module: red	Os05g0529700	24.6307	3.1794	42.729	3.0008	18.0981	6.0664	22.8361	3.2991	19.246	3.1418	42.738	6.5038	17.8168	1.7544	17.5117	2.2941	212.924	3.8301	22.4913	3.1901	12.9342	3.0176	31.0776	3.422	75.2032	5.1045	81.0205	3.651	130.94	11.1187	101.138	22.9951	103.243	8.0829	140.235	7.5472	199.192	3.6463	274.107	5.2597	169.928	3.1122	201.97	2.1646	28.0311	4.0824	143.703	2.8882
Module: red	Os01g0382400	27.9416	0.2681	32.9674	0.2124	51.8552	7.663	29.6154	0.3785	35.8256	0.8312	31.4055	3.0778	31.2352	0.828	55.7488	0.4347	334.536	2.8983	23.4466	0.0877	49.9157	0.9329	41.2552	2.957	139.276	7.7782	182.188	9.2925	185.473	12.9125	119.626	10.2462	190.804	11.4875	237.281	15.2044	298.948	3.6681	415.703	2.024	291.552	4.0266	205.231	1.0412	23.9618	7.3431	303.065	1.1686
Module: red	Os01g0944900	2.3919	0.8219	17.2209	1.954	5.1503	1.9326	5.2	1.0178	6.4769	3.2614	12.7115	5.1849	15.3963	1.9918	40.9543	3.6294	128.294	3.1899	28.004	3.4123	32.1482	6.0006	28.7846	4.3496	26.9098	1.2461	52.0149	0.3401	55.6528	2.1083	50.1184	1.8948	59.2833	1.0566	64.867	0.6498	76.3141	0.982	126.374	1.4321	114.599	0.5698	73.4206	1.4734	31.5373	0.4871	70.6777	1.2779
Module: red	Os01g0944700	10.3568	1.9757	30.8806	2.7193	30.1718	5.8272	17.0199	1.3215	30.3861	9.1451	22.8614	8.2718	16.0449	5.2512	30.6168	10.4715	327.108	10.165	16.3469	1.9387	36.242	5.9215	28.2642	4.9351	111.069	25.4466	118.625	23.3984	131.284	9.8248	109.266	51.4875	137.281	12.6327	190.472	13.7152	281.851	2.9995	344.166	0.8096	302.749	3.1759	185.012	0.3635	19.0922	2.6036	292.117	2.0399
Module: red	Os04g0511200	3.6996	0.5828	11.3254	1.1289	7.4851	1.4844	5.6419	0.8778	6.681	1.6427	17.1427	11.8417	67.5237	1.98	107.641	2.2681	431.312	1.3418	106.548	1.3343	111.037	2.3968	75.6142	2.4247	114.848	11.1665	153.031	2.2059	340.073	13.4595	195.767	33.4959	184.64	5.9935	296.023	8.6515	344.532	3.0891	534.707	1.8334	497.036	7.716	377.552	3.8479	94.2401	9.312	312.849	4.7731
Module: red	Os05g0568100	14.9147	11.2973	19.8208	5.858	13.9588	8.4082	14.9354	8.981	16.5496	8.964	26.3295	12.0673	22.6431	3.7479	26.2493	3.7998	72.0162	2.9531	23.8469	4.3113	18.8121	3.5741	23.5516	3.5831	27.5101	3.3216	31.5969	1.1253	53.5369	3.7984	43.8946	4.9978	39.5132	2.7792	47.3821	2.867	67.2348	6.035	88.7284	2.0733	94.8949	7.7515	61.8149	6.0132	25.6579	8.5963	66.42	8.1255
Module: red	Os03g0184100	39.6896	13.303	26.0209	16.4697	22.2775	8.8232	41.2881	12.6747	30.782	15.1554	39.7942	9.6747	141.521	45.1668	148.848	55.1449	157.229	50.5663	98.1966	60.1485	152.476	69.8482	167.139	55.345	88.3697	40.9772	85.6788	34.4733	119.746	31.5837	96.7317	33.949	87.8964	52.5973	97.6535	32.3901	127.819	20.3289	150.109	20.3255	141.34	24.8835	154.072	20.1807	174.895	27.8462	150.642	25.4856
Module: red	Os04g0513400	3.6131	1.9057	5.8254	1.5102	6.144	0.863	3.3106	2.7987	5.1811	2.2383	6.0284	1.3718	6.0236	0.9614	9.5204	1.2155	30.457	0.744	8.9415	1.8077	6.5039	1.5274	7.4377	1.3461	19.6735	1.7389	24.5798	2.6196	26.1667	2.9892	17.4545	5.4906	21.8465	1.6333	22.8634	2.9501	36.843	1.5035	34.7703	0.4497	31.9379	1.7599	29.1309	1.3077	8.7644	1.8216	34.0308	1.5357
Module: red	Os05g0572000	2.5768	0.1615	2.7461	0.0853	2.1716	0.0914	2.3232	0.0912	1.8646	0	1.2805	0.7063	12.3999	2.444	24.5452	2.3045	24.8357	0.5335	16.3481	1.0565	22.745	3.8828	19.253	1.2188	3.7121	0.8841	8.0686	0	15.0841	0.2393	5.7651	0.2806	8.9307	0.4152	11.4867	0.4918	26.1123	0.1194	31.7717	0.1524	29.1376	0.6468	28.2412	0.69	25.4419	0.2074	24.7725	0.512
Module: red	Os06g0697200	1.4598	0.4051	3.4139	0.5351	1.6502	0.4587	2.3369	0.4577	1.7418	0.7994	4.6117	1.9658	1.8024	0.219	2.2837	0.6898	18.6778	0.1825	3.306	0.5301	1.5045	0.1602	4.2818	0.2352	6.7343	0.4436	9.1437	0.0605	15.2526	0.1501	9.099	0.6599	8.8021	0.4774	11.9307	0.2313	16.0189	0.7866	23.6492	0.239	22.9928	1.0819	16.0173	0.7081	3.3921	1.0404	13.9356	1.0035
Module: red	Os03g0626500	5.7374	3.8891	10.9448	3.5222	7.9742	3.8918	7.6347	2.8832	9.6736	1.6444	12.8437	4.0437	8.0243	2.6384	12.2689	3.3786	76.9408	2.8157	9.7223	4.3616	9.5052	4.2185	12.6671	4.3544	22.5039	15.7405	28.5086	10.5842	33.2612	13.741	29.8124	14.4788	29.3706	7.8567	49.0826	11.341	64.7418	6.0099	114.305	1.6714	53.1004	10.9184	57.1751	6.7166	11.9896	7.4906	58.4017	6.6881
Module: red	Os04g0460300	7.4652	5.2034	5.4462	4.2405	10.3358	10.5597	6.1907	6.4723	10.0361	4.4627	6.7117	9.3215	12.3332	6.8048	13.3034	6.535	91.0581	6.6499	13.0711	6.0839	12.7155	3.9579	11.0696	4.0493	31.0314	13.6981	35.3585	16.6744	63.5655	16.3265	46.0032	16.0129	41.683	17.7436	58.7788	21.4931	92.5631	15.3129	135.239	8.8816	80.0965	8.98	94.1772	10.3204	11.1233	13.4102	72.9232	13.9527
Module: red	Os01g0160800	3.6229	5.1891	44.3045	17.4113	3.9402	25.1706	4.6302	8.0448	3.3769	29.1303	27.2391	24.945	83.1621	9.2585	67.3448	50.5433	436.502	52.4729	115.966	19.0142	66.7707	70.8894	84.0131	28.9403	202.665	25.2054	172.922	19.0042	193.472	38.7202	268.961	30.2834	241.602	39.2458	270.045	25.6578	391.419	12.4944	614.09	17.1152	214.903	8.3473	411.768	14.9234	104.288	13.3261	279.914	11.9454
Module: red	Os02g0503900	6.5231	1.5984	10.2618	5.911	3.9564	4.0068	7.2517	2.2248	7.3485	4.6343	13.4922	4.8375	11.7166	2.7505	16.7776	6.8132	48.85	3.6002	15.6919	1.4565	9.4786	1.8782	14.6148	4.8055	26.9775	2.1251	26.9014	0.4094	43.2476	2.4536	32.3394	1.8348	28.9196	0.5871	33.6856	2.3034	43.6535	1.14	62.4918	1.8318	52.9035	2.5914	34.8439	3.1928	21.9721	2.199	44.6646	4.8414
Module: red	Os06g0473800	2.6052	0.9308	4.0277	1.2908	2.5275	1.4819	1.137	0.3943	2.2295	1.3775	2.5	1.7175	1.5315	0.7547	3.7035	1.2453	40.6397	0.3145	3.0262	0.3425	2.7775	0.6626	3.7304	0.1013	9.6627	2.2931	14.4673	1.8775	30.7973	2.1986	13.4824	4.3966	15.6839	4.7865	23.537	1.993	38.1571	1.1618	52.6405	0.1647	39.4288	0.466	36.2463	0.2711	3.8692	0.1494	23.4603	1.66
Module: red	Os12g0564100	1.1062	1.6667	6.1797	2.5257	2.9717	4.3944	1.7144	1.09	3.254	1.1127	6.4173	1.8704	6.4148	21.0517	12.309	21.195	46.7519	17.7034	10.7368	15.9246	9.3302	15.7629	12.8539	17.1621	17.6487	11.6217	21.5406	4.5611	29.5513	6.5979	25.7969	11.5062	23.0859	12.5927	32.3207	8.8152	35.3158	1.3625	70.0624	1.6972	35.435	1.4054	31.2366	3.0323	14.0474	3.792	29.8604	0.6953
Module: red	Os03g0168300	16.8549	8.2004	25.8628	6.9467	13.2069	5.3782	17.2242	6.9	11.7957	4.9739	20.5713	4.4061	12.9864	2.1486	10.5762	1.981	167.929	2.5987	12.5034	1.2209	9.9907	2.7375	29.6165	2.5118	77.6232	11.5178	75.0904	7.7066	136.309	14.1446	92.6919	22.1814	79.3353	9.0155	137.965	14.1439	137.043	4.8942	230.632	7.0457	137.924	5.7766	145.016	4.6789	20.5677	6.8261	109.373	3.8999
Module: red	Os09g0532000	33.0167	24.3521	78.1769	26.593	27.5462	43.1324	35.4175	27.689	29.3623	22.5293	69.6299	37.4658	103.325	54.1105	122.01	54.3074	249.192	45.1542	105.442	49.1321	94.643	51.0795	152.443	52.1266	92.165	44.1558	116.559	33.3588	197.612	61.1769	124.121	64.8595	115.795	57.3541	183.667	75.0305	229.756	29.0715	271.175	21.7195	250.979	17.5579	250.303	15.4365	172.992	37.2102	177.839	29.1271
Module: red	Os10g0389500	10.2197	2.9723	7.277	2.5763	3.2429	1.4196	11.1946	2.7938	6.0585	1.8852	16.0379	1.8663	35.6276	4.992	34.2236	7.0042	31.5373	4.1426	25.3676	5.5145	24.6502	5.554	44.1753	9.1809	22.6946	0.9916	19.9748	3.7472	39.1871	3.3556	28.2542	2.6627	22.7373	1.1941	34.3302	1.7502	33.0712	2.834	32.7097	1.5122	30.0522	4.4647	32.3726	4.0047	45.5119	2.2065	38.0093	5.0248
Module: red	Os02g0643000	21.6104	20.9918	24.783	20.0294	18.0645	22.8945	19.01	20.4432	19.0276	23.4141	27.9129	24.6357	15.1747	14.1971	15.9849	14.7904	63.2091	20.0002	19.3351	9.471	12.8642	19.0076	14.9135	14.1307	38.5564	16.1488	47.675	15.4664	58.3892	21.859	42.6283	20.5148	46.5541	22.334	58.8	21.9057	64.0645	9.7041	82.983	12.9804	74.1266	10.8125	55.6799	11.6679	13.5723	18.899	50.0473	9.9689
Module: red	Os01g0944800	0	0	0.1926	0	0.2187	0	0.2869	0	0.1039	0	0.0541	0.289	0.3092	0.1959	1.2337	0.0686	16.9703	0	0.4313	0	0.2804	0	0.8033	0.0614	1.1496	0.1157	5.1015	0.6318	3.0633	0.235	2.5983	0.6428	5.5326	0.0906	5.6542	0.0805	11.6089	0	12.5699	0	7.3622	0	7.557	0.6569	0.2992	0.5429	8.9853	0.7541
Module: red	Os04g0583900	1.7222	0.9988	1.85	0.5277	1.2398	0.735	2.1417	0.8744	1.5213	0.7883	2.938	1.174	5.624	5.2751	6.4114	5.9603	13.1695	4.6193	5.4503	7.3834	4.7951	7.8995	9.4644	7.596	3.5055	3.1714	5.6141	1.0148	9.6651	1.6653	6.6928	2.4293	5.8686	3.8948	9.0651	1.5588	12.2578	1.6991	23.8045	2.6865	25.6077	2.4337	11.298	1.0862	9.705	1.4534	11.5304	1.8604
Module: red	Os10g0173000	12.3684	1.4194	16.2556	2.1693	7.3153	2.5826	11.889	2.5771	6.7251	2.9151	12.2152	17.2947	48.8608	5.7307	97.303	5.0311	103.308	3.0145	61.5837	1.9898	66.2373	3.9453	72.96	6.6219	29.7713	1.3322	55.6949	0.7272	103.255	9.2414	55.0941	3.9633	42.9536	2.4765	71.5697	1.9683	102.599	4.8369	110.526	1.1483	147.43	12.0818	83.5393	6.1433	95.0509	25.3861	87.0049	15.9118
Module: red	Os03g0694000	5.7381	5.1501	10.9868	10.2808	15.8308	16.9935	6.3174	14.9686	11.0507	24.8084	8.7048	22.8289	8.629	19.9343	16.7049	25.3089	410.205	41.4092	10.1738	9.3401	13.9547	48.1381	16.0247	45.1336	47.4703	1.0707	102.715	2.3378	150.244	1.3044	70.0493	7.985	114.532	0.5867	125.481	3.4246	192.22	0.3616	366.468	4.3377	206.366	2.9377	216.056	2.127	11.3471	2.595	211.403	9.2236
Module: red	Os06g0639500	13.8835	6.2428	17.9361	5.5815	10.7838	3.783	14.317	6.5551	11.3648	6.1366	16.317	5.251	8.0967	3.8317	7.919	3.2448	38.5479	3.4373	6.9596	3.9008	7.2605	3.1398	9.3711	3.8799	28.487	5.3896	24.4938	6.7447	35.2675	7.5918	26.4886	6.9527	23.9885	3.7042	31.7445	7.2815	44.6178	9.6198	50.8143	8.9135	36.0246	8.7361	46.1736	8.2692	9.325	9.0437	32.2924	8.8181
Module: red	Os01g0804200	2.7485	1.509	7.0497	3.005	4.3829	4.7638	3.592	1.5408	4.3061	2.5523	5.7901	2.6021	2.9994	0.1076	5.912	0.6024	25.4076	0.2092	4.3217	0.6075	4.1875	0.8814	5.9824	0.5391	8.3206	0.1907	12.1271	1.5957	9.8216	2.0215	11.4132	1.6638	11.5781	0.8456	11.3945	1.0605	13.0128	0.4293	19.7279	0.3287	12.7589	1.7824	15.5996	0.6763	5.7219	2.7823	12.9651	1.5181
Module: red	Os02g0574500	18.1666	8.4443	26.4693	6.7831	16.8846	9.5491	18.8477	9.9513	15.0212	6.6541	25.2723	7.0825	26.8624	7.2911	38.8529	6.0128	61.0944	11.5506	20.9653	7.4201	30.5434	10.8197	27.4024	8.8913	41.2124	18.9123	47.7271	10.8049	71.0301	15.1465	44.7813	24.157	41.1651	28.176	61.2009	24.0643	57.6071	3.5346	78.661	3.9124	60.175	3.2671	63.5912	2.9072	42.5022	3.9921	47.4384	3.1945
Module: red	Os05g0539600	3.7698	3.2138	3.8098	4.5876	3.1967	4.1108	3.825	3.8052	3.6137	3.676	3.6678	3.0412	4.5499	4.2761	4.7872	4.6505	12.3657	3.5453	6.7927	4.104	5.8526	4.8296	6.3558	3.4985	6.3855	4.5679	8.9133	3.8047	9.2752	5.1068	7.2342	4.9126	7.9346	6.7802	8.8452	4.6112	9.0398	4.8228	11.7024	6.2123	9.941	5.4464	10.1374	4.9452	6.3117	6.5075	9.3833	4.311
Module: red	Os04g0570500	1.0887	0	2.909	0	1.2548	0.0704	1.1144	0	1.5893	0	1.3366	0	1.0311	0	1.1551	0	4.5286	0.0747	1.0787	0.0407	1.386	0.0394	1.4774	0.1083	5.4122	0.0681	4.3443	0.0744	4.1205	0.1844	4.5872	0.1621	5.2217	0	8.2478	0.1421	12.0579	0.046	14.858	0.0587	5.849	0.2492	6.5301	0	1.2324	0.1065	4.6237	0
Module: red	Os04g0494100	22.8341	0.3934	25.5075	0.9354	50.4676	12.6947	31.9327	0.7223	38.4213	0.7209	22.7955	6.5608	29.3	1.0329	63.1415	8.422	190.444	23.4553	27.8914	1.8661	55.2072	1.307	39.4327	9.9934	66.4693	25.3095	96.505	10.229	70.2948	13.9223	54.8602	36.229	96.5054	17.872	113.512	23.3641	190.312	11.1312	201.855	3.899	180.945	6.7635	138.593	4.3554	22.549	7.0728	174.339	2.8847
Module: red	Os04g0541700	16.7431	3.0512	30.9721	3.7997	17.289	3.2847	11.2697	5.1241	12.0468	6.036	21.4075	7.194	68.055	19.8917	168.231	24.1212	134.125	10.4562	75.1515	19.2481	88.9246	24.667	117.509	19.0742	47.6335	48.4127	73.6889	14.1654	154.625	26.1035	66.9157	57.436	58.4343	55.056	111.943	17.5464	132.567	4.0502	165.884	5.0138	209.154	18.0597	145.443	6.9202	136.162	13.7124	137.942	7.061
Module: red	Os11g0644800	13.7174	0.4763	15.1434	1.7363	14.1163	3.8421	13.8471	1.2107	14.7789	2.4973	21.6386	2.5781	7.28	2.6923	8.3389	2.5026	143.086	5.5789	8.8544	1.4957	6.1023	2.4412	12.353	2.8206	43.725	45.1387	63.5264	16.3119	102.305	37.0622	79.2375	57.5343	76.625	92.4022	117.335	40.0339	161.56	3.5407	214.151	3.5739	125.835	6.4868	151.651	6.6047	8.6613	10.0914	118.16	7.985
Module: red	Os05g0542500	1.2976	3.5189	9.5691	17.2313	8.4755	8.6514	6.9714	8.2769	7.5094	32.2452	26.1574	217.731	73.821	10.4146	86.0152	81.4063	921.171	9.2748	96.2281	9.4317	90.1071	8.3745	93.8516	12.8523	78.9028	44.2521	257.202	9.3229	680.882	22.4769	212.322	75.6912	254.681	32.7475	565.269	8.6968	759.991	28.9024	1208.07	33.162	1224.33	82.3098	818.633	98.4701	116.352	90.9082	571.778	46.7712
Module: red	Os03g0775500	45.6449	55.9584	50.9766	61.7407	55.5418	46.8781	54.7093	61.008	48.105	55.1265	50.6625	49.5053	45.3	41.7585	48.2362	37.3766	126.633	41.203	44.3348	39.4097	40.6913	37.1696	46.4457	35.6251	85.6389	49.4357	90.5717	58.1427	100.234	53.6993	82.336	69.232	92.0069	46.9263	94.2514	65.9924	105.161	41.4204	129.407	40.8462	111.732	42.7973	107.563	57.0663	38.9462	73.561	106.462	51.9994
Module: red	Os12g0110475	0.325	0	0.0852	0.0371	0.3991	0	0.2666	0	0.2757	0.1186	0.5383	0.1918	0.1368	0.0433	0.4466	0	1.319	0	0.2147	0.1377	0.4466	0	0.6997	0	0.7282	0	1.1949	0.0839	1.2706	0.052	0.739	0.5485	0.5196	0.3607	1.3972	0	2.3432	0.0519	2.2555	0	2.5651	0.1873	2.2219	0.109	0.3309	0.4204	1.6918	0.3336
Module: red	Os05g0427100	6.2864	8.2143	14.3067	7.5132	8.282	8.6953	7.3669	8.6766	7.4941	6.9465	9.5803	9.5261	23.0226	32.4575	28.0766	19.8578	37.4476	20.2792	27.904	26.4549	27.413	25.5182	24.4933	26.124	19.722	14.6799	26.535	7.4614	27.6398	11.7857	21.4427	11.788	23.2639	12.4675	26.1927	8.3061	36.3165	15.8584	48.7005	16.6494	42.2469	13.6974	36.3737	9.6138	28.9064	16.495	32.8557	12.3908
Module: red	Os11g0671100	16.264	16.4617	25.4437	25.9671	31.4142	18.2832	15.3747	15.3355	27.4271	22.036	37.6581	17.2751	30.9231	13.3739	41.2245	17.2316	79.1007	16.589	28.648	16.843	45.9409	24.6577	48.972	16.4417	57.6774	28.4464	70.2326	19.0244	55.4125	19.2525	36.6418	30.5995	70.6705	24.3725	55.6722	27.2629	46.9079	11.5123	55.7242	12.5912	65.2566	10.0782	61.7947	15.8181	37.0952	29.4522	56.91	16.14
Module: red	Os05g0575000	23.6922	24.5483	85.3145	18.2866	13.5222	59.613	32.2846	18.719	15.7403	25.0152	62.4485	46.6057	75.7577	12.0557	51.4752	12.898	634.568	32.5129	66.1039	6.986	30.0829	14.2125	130.741	23.6225	271.041	137.486	327.092	55.8994	639.689	115.153	393.832	205.839	420.914	214.286	613.317	158.671	740.498	27.9167	941.428	19.8093	558.209	25.8116	786.167	18.736	152.675	46.9664	512.383	23.9331
Module: red	Os05g0137400	269.269	364.709	326.354	325.341	276.269	296.808	284.773	358.606	294.009	330.127	335.313	320.583	295.217	249.539	313.664	282.986	724.672	317.685	278.382	263.439	290.751	265.854	329.287	259.121	478.638	325.221	515.161	294.137	623.158	363.919	484.08	371.064	508.556	260.693	578.156	378.669	732.396	243.08	738.509	196.9	727.42	211.973	734.455	229.705	311.014	352.507	634.739	274.933
Module: red	Os03g0298300	20.6975	21.0704	24.37	19.4951	23.0228	13.535	21.6948	22.1984	19.838	18.2381	20.8676	15.3346	37.5938	16.5596	40.6458	13.417	47.2281	10.2871	30.4655	13.9648	33.2262	12.2502	34.1907	15.0347	33.4565	13.77	40.1649	13.3513	36.6075	12.0786	33.1204	16.6745	34.3169	11.4166	36.4409	15.3694	42.5852	17.3186	50.291	14.6023	36.0517	16.018	44.4748	18.189	44.1396	24.293	39.5482	17.641
Module: red	Os05g0582500	2.6628	0.7664	4.1502	0.3037	1.6847	1.0846	2.2884	0.9019	2.5104	0.6481	3.8228	2.5839	5.6669	6.9042	7.9285	6.9598	53.7607	7.9025	10.7161	9.5262	7.2505	8.365	9.4345	9.4179	2.3363	1.1888	10.8786	1.5268	23.3005	1.1832	5.9804	1.5534	11.0059	1.3684	25.0766	0.6321	57.6315	0.5196	65.3203	0.663	64.1096	1.0659	71.4938	0.8434	10.6344	0.9841	40.805	0.4556
Module: red	Os01g0105800	3.6561	1.6052	4.0213	2.6077	3.3625	1.7718	3.1372	2.244	2.5435	1.8326	4.3729	3.0278	3.1695	1.3386	2.8103	2.1866	13.2915	2.3863	5.7715	2.4416	3.7043	1.6759	4.5176	1.957	7.6773	1.45	7.3823	1.583	10.778	2.7657	7.8913	1.8825	8.9168	2.6827	8.5634	1.0082	10.1143	2.5823	13.0872	2.2725	11.6342	6.269	11.2216	2.7121	3.1801	3.71	10.4716	2.5765
Module: red	Os01g0225000	7.817	0.9798	15.4114	2.174	3.5473	3.0504	6.4893	1.6049	4.9103	1.7676	14.8871	1.982	38.2615	2.7236	48.341	2.4151	67.501	4.2373	49.8689	2.1152	43.609	3.2237	49.7502	3.5267	30.0779	19.2032	44.2815	4.2162	50.855	10.9637	43.2928	22.0441	45.6698	29.8104	53.0222	9.5479	46.4133	3.3336	88.6577	3.144	56.4262	4.5133	45.4412	3.9578	61.2365	5.6194	52.5665	4.349
Module: red	Os04g0531900	31.8881	38.9347	77.7776	44.9571	34.2768	24.3247	35.2657	39.5681	35.3665	37.7533	74.6755	19.9933	42.7655	43.4165	48.0921	48.292	157.892	38.6939	48.3564	57.2852	33.1105	46.57	68.1239	24.0522	93.4384	5.2374	96.1933	3.8732	146.801	11.8918	128.004	18.1621	94.6644	2.6449	124.022	2.5256	159.383	5.0216	161.001	0.8738	167.614	4.4294	154.574	3.6558	68.5975	9.3779	154.28	3.8525
Module: red	Os01g0161300	0.7137	0	0.9624	0	0.461	0	0.7886	0	0.6813	0	1.0471	0.018	0.853	0	1.4712	0	2.5466	0	1.549	0	1.2259	0.0418	0.8311	0	1.5177	0.1084	1.4433	0	1.8622	0.0245	1.9128	0.1721	1.4997	0	1.5592	0	3.7259	0	2.2914	0	2.17	0	2.5544	0	1.0433	0.0848	2.2581	0
Module: red	Os04g0466000	7.6739	0.9466	4.2253	1.2002	4.3328	2.3308	7.4769	1.1228	4.8834	0.8005	5.5932	0.8539	6.9222	0.7017	5.8001	0.6447	51.6135	0.1706	8.3274	0.3716	6.0258	1.5273	7.014	0.1649	15.7224	0	22.1695	0.8486	27.8475	0.5261	10.1378	0.4934	20.6119	0.1217	26.6628	1.4053	61.8705	0.6301	49.4929	0.134	75.4659	0.7583	48.4408	0.4412	5.8268	1.337	60.9078	1.238
Module: tan	Os11g0181200	0	1.412	4.3537	1.0329	0.5056	1.4756	0.3538	2.7608	0.1601	5.9705	1.8337	50.1503	79.193	4.831	108.823	13.8445	97.7934	3.7188	37.5578	5.8623	58.6011	8.9688	51.3863	7.5671	6.2822	10.8821	28.0294	0.9738	177.395	9.176	18.2123	10.0488	21.2385	5.3062	119.414	2.7289	67.6149	1.4461	95.2085	0.3075	347.236	11.5294	84.1151	4.1766	87.9958	13.9469	56.6858	5.4239
Module: tan	Os10g0505900	1.3202	0.3753	3.6091	1.6855	1.1324	0.5311	1.5961	0.6713	0.8606	3.8793	3.1683	57.0125	72.4005	1.0433	42.3795	17.8943	95.904	0.9769	39.5597	2.0053	48.7492	2.0186	51.7306	1.7069	7.8546	7.0549	27.8101	0.5234	157.132	4.1721	15.7423	11.7376	15.4749	3.1632	101.344	1.9526	74.842	1.8045	91.4669	0.8856	217.788	8.394	104.614	2.1867	81.5575	5.7297	76.1996	4.0162
Module: tan	Os03g0723400	0.2186	0.4246	3.9325	1.3459	1.9216	1.1417	1.4407	0.6595	1.3561	4.9672	4.073	45.0362	65.9838	10.0984	97.9895	28.0245	131.218	5.0371	62.0955	8.3334	77.0366	11.4183	55.0097	7.7651	16.4772	22.1999	64.3089	3.2991	185.507	11.3276	40.7539	18.5348	56.8177	11.2813	141.469	4.2832	75.6963	4.9464	134.41	2.5047	361.117	23.5984	89.29	9.7304	97.0889	29.5323	96.3184	20.4458
Module: tan	Os05g0122700	0.0892	0	1.0526	0.0916	0.1793	0	0.1882	0	0	0.2931	0.266	3.1271	11.9143	0.4283	11.034	0.3373	30.2486	0.3123	6.0107	0.1134	5.9765	0.7677	15.2303	0.805	3.2558	5.3137	10.7264	0.2072	53.7253	1.9266	7.2019	7.8292	6.1618	0.8913	34.0264	0.3959	19.8241	0.7692	37.4169	0.1636	56.8868	3.4712	30.5851	0.1346	13.4896	9.6438	22.6818	4.5335
Module: tan	Os11g0451700	0.0808	0.6283	1.6217	6.3482	2.884	3.1119	2.9419	0.8872	2.5082	16.2936	8.4776	175.315	21.2883	9.994	20.7908	68.2124	233.198	4.1512	29.1587	13.8208	29.9141	9.1931	25.6278	11.1707	2.9118	15.9945	35.6282	3.3795	300.219	6.2273	23.8547	27.0163	24.6633	7.4714	213.084	3.5277	112.086	3.1368	144.294	2.0754	583.329	18.298	210.193	5.7958	23.0791	6.2523	134.169	6.9097
Module: tan	Os01g0743500	0.1259	0.424	0.2971	0.2584	0.9614	0.2215	0.6905	0.4697	0.4807	0.6343	1.2763	9.4409	0.1192	0.7555	0.6488	0.7615	20.6358	1.0872	0.474	1.4401	0.9861	0.9286	0.9759	0.4544	0.6045	0.5892	2.3053	0.3508	34.377	0.58	3.5213	0.34	3.2125	0.2516	18.2328	0.1862	7.2539	0.2895	11.2595	0.3693	60.3045	1.3716	13.0813	0.532	0.4846	1.2562	13.5383	1.5122
Module: tan	Os09g0109600	1.7134	5.5478	3.942	6.9464	1.2912	4.8047	2.4396	7.0506	2.1261	10.7905	5.6196	67.8816	31.8073	2.7759	22.2507	23.9667	138.494	1.2996	29.0293	3.8108	24.1922	3.5805	34.1516	3.7684	15.5499	8.9295	31.9401	1.3926	125.402	6.2901	24.2537	2.6024	29.9958	1.5691	102.001	4.4348	74.8822	7.5092	84.4315	4.5553	217.347	47.2215	101.138	13.3168	41.6869	32.6259	89.9515	18.6007
Module: tan	Os03g0305600	2.2819	1.278	5.3847	2.0256	3.0986	0.6104	3.7076	1.6919	3.9443	1.8914	10.7883	21.5518	8.0027	0.8882	7.5642	6.6839	126.852	0.5757	11.9157	1.0974	5.9749	0.3791	15.7646	0.9043	32.5765	1.9679	56.6002	2.1483	194.072	2.8413	51.3994	4.8919	80.1053	2.5672	156.134	1.0946	90.2307	1.418	118.936	2.2616	238.928	19.0372	103.007	4.6538	6.7255	14.4617	93.2266	9.8769
Module: tan	Os04g0589800	1.6056	0.6617	1.8944	0.824	3.0067	1.1236	2.925	1.3615	1.3236	2.5579	2.4662	29.1469	20.2534	2.4524	27.3049	3.4949	135.961	1.7884	12.7266	2.4117	17.2999	2.1531	22.898	2.7987	4.3456	17.2323	29.303	1.1864	219.311	4.0978	9.7916	24.5102	12.6718	5.7114	143.776	3.5621	64.797	4.929	81.624	5.085	444.75	15.2394	96.296	7.1592	21.134	15.0501	74.668	8.6535
Module: tan	Os06g0698300	5.0452	5.1753	12.7149	4.9298	4.7452	5.2376	7.4496	4.6506	6.0488	7.3384	11.3126	23.4932	71.6023	15.0645	78.2494	26.2455	105.397	13.0465	67.2243	18.9291	52.4136	10.2703	59.7049	15.6146	27.8705	32.5401	56.6757	8.4357	166.289	16.7933	40.6594	43.5946	45.1456	28.9652	112.31	7.9398	87.0687	7.5978	106.491	7.1046	228.933	18.5835	110.769	13.4618	91.2479	20.1371	105.221	18.2729
Module: tan	Os05g0572700	0.2804	0	0.4411	0.032	0.0939	0	0.2957	0	0.3866	0.0682	0.6502	0.8603	1.6818	0.0748	1.798	0.1963	11.5545	0	2.4384	0.1584	2.5364	0	2.846	0.1405	2.0943	0.1988	2.9208	0.217	14.9393	0.3139	3.5774	0.3154	3.0183	0	9.5053	0.4608	11.5168	0.3134	13.745	0	19.6007	0.1616	14.4864	0.3291	2.4551	0.5699	11.294	0.6236
Module: tan	Os12g0464400	0.0369	3.3461	0.1306	3.5229	0	3.734	0.2725	4.3335	0.1409	2.1829	0.807	8.9771	0.2797	0.1772	0.1902	0.5581	23.7484	2.1965	0.3291	0.2814	0.1902	0.2268	0.6812	0.4579	0.3899	0.3925	3.4604	0.7714	37.5131	0.8502	1.8044	1.1212	2.2659	1.7821	23.4609	1.4739	13.6444	0.2121	13.9422	0.0677	61.4563	0.4787	18.6549	0.1671	0.3382	0.7365	15.6767	1.4777
Module: tan	Os06g0681200	0.996	1.7814	5.5959	3.6509	3.479	12.622	5.0022	2.1338	2.3994	6.1816	11.3133	74.5064	64.4621	2.9029	73.4708	9.6824	347.027	13.3934	57.7999	4.6415	75.3739	8.8035	71.2953	11.4476	46.0045	24.1124	112.531	10.3531	455.316	12.6321	103.536	23.2921	110.011	8.6077	329.957	4.7	348.531	10.8362	450.454	16.4359	719.358	21.5294	295.719	12.7407	72.887	52.7673	215.881	19.5
Module: tan	Os03g0111300	0.4348	0	0.3848	0.2231	0.6554	0	0.6879	0	0.1038	0	0.3241	3.5794	3.6036	0.1305	1.2324	0.6849	25.556	0.2537	1.2925	0	1.6805	0	3.9122	0.9809	1.4616	0.925	8.2737	0.7573	64.8079	0.313	2.9663	2.018	3.5455	1.448	42.6625	0	23.9417	0	35.4604	0.3986	73.5447	0.7049	33.1586	0.1641	1.9923	0.1808	43.6688	0.1674
Module: tan	Os05g0373900	3.6192	4.6535	7.4573	4.0646	2.6353	3.2014	6.03	4.0578	4.6563	7.4684	13.9192	34.7925	11.0538	5.7283	13.2179	12.3275	71.6531	3.1216	19.7225	4.8665	15.6499	6.0608	25.7985	3.7271	27.9576	1.6736	29.7388	1.3399	98.3208	2.6808	42.1338	2.7441	36.756	1.703	73.0631	1.2801	78.132	2.1481	73.1472	0.9137	139.772	11.4968	95.0748	1.9394	20.0198	5.321	67.2211	6.6231
Module: tan	Os11g0454300	4.3851	2.3664	25.2653	16.1277	30.1829	9.082	21.7371	10.2655	23.2309	34.2602	63.2683	437.2	577.934	17.1911	504.235	168.635	3499.73	18.9331	464.961	26.0085	538.56	19.4953	457.595	25.3064	93.3517	269.266	587.049	27.4946	3282.92	45.9807	385.9	398.638	420.301	142.499	2422.6	50.6972	1841.02	90.0017	2744.21	56.0145	6366.27	392.518	2642.98	115.151	714.884	308.476	2050.49	404.701
Module: tan	Os11g0454200	0.9494	0.2306	3.5706	5.6032	2.6832	2.0882	2.5034	2.2139	1.9825	20.7976	6.7824	181.521	129.885	5.341	121.341	78.7417	347.923	4.2239	108.004	6.1843	130.509	4.3037	83.6703	7.0275	6.7816	37.363	55.8328	3.445	347.743	8.4576	35.9606	42.8616	36.7723	25.096	229.274	7.0213	137.692	5.2866	266.466	19.4757	801.063	36.4796	212.614	22.5675	155.141	40.3618	163.125	24.4887
Module: tan	Os07g0209100	15.4298	5.7606	18.745	5.2602	17.3436	4.0257	14.4205	4.7401	15.2351	5.954	14.4443	10.6927	33.5973	1.4278	18.7329	1.9606	104.01	1.1747	37.3584	0.8142	21.5239	1.44	35.9596	2.6838	30.3578	12.6928	37.6337	3.6129	116.739	9.8027	35.2328	10.4099	43.0175	5.6381	83.7316	5.4685	85.1054	12.2038	54.19	5.269	142.438	42.469	139.256	13.2315	36.4482	42.6762	104.247	42.5316
Module: tan	Os08g0104400	0.5581	0.2065	1.2229	0.9002	1.2818	0.263	2.5227	0.0875	1.2177	1.5718	2.932	45.7298	2.8696	0.3827	3.8622	2.2104	56.3803	0.1861	2.5279	0.4053	2.4651	0	0.9565	0.1799	1.608	0.848	5.7164	0.7406	66.7699	0.2296	5.1671	0.4037	11.2429	0.2655	46.9794	0.1179	15.2079	0.1146	26.008	0.5848	161.821	1.5511	30.0667	1.0829	1.3882	1.4585	22.4137	2.8238
Module: tan	Os04g0610600	0	0.6864	0.1705	1.3351	0.0968	0.5298	0.1016	1.3217	0.2299	2.0052	0.6704	17.2455	3.9244	2.8332	3.8732	6.375	23.5555	1.2369	3.0073	1.4696	4.1213	1.2437	2.712	2.0106	0.2776	1.9472	3.7732	0.7832	61.5632	0.4855	0.9312	0.7318	1.3403	1.0429	36.9108	0	8.5741	0.0692	7.7864	0.0883	104.346	2.4994	15.5854	1.0907	3.223	0.8012	8.2153	1.0387
Module: tan	Os03g0820500	27.1237	9.1878	69.4206	15.2759	23.6908	12.0843	26.04	16.3322	26.0901	30.7743	49.0088	142.424	441.543	22.2853	497.757	77.5645	476.439	12.9852	467.476	28.7277	452.506	30.8629	390.143	23.3759	152.756	179.455	287.99	24.2261	676.345	72.4925	238.334	245.779	266.265	171.502	566.963	67.6858	446.123	19.9876	602.69	19.1283	755.668	48.3481	448.131	41.5644	483.547	82.2357	385.479	68.3275
Module: tan	Os06g0553001	10.2018	9.5135	19.4515	9.2145	8.0369	10.9498	13.8587	10.4785	9.894	13.8555	19.7925	13.9568	57.5896	33.6938	82.5202	25.9181	103.427	10.4762	44.3946	25.1025	58.5438	29.6965	72.9792	21.4483	38.2502	14.9306	74.9016	11.3718	129.643	17.2725	60.2242	12.5341	64.2774	10.4638	95.0088	6.5185	81.8511	11.4932	118.308	10.6249	146.186	35.4604	95.204	17.244	86.085	35.2897	105.567	22.245
Module: tan	Os11g0533400	0.0672	0.087	0.1586	0.4138	0.2026	0.4434	0.1418	0.3687	0.1924	0.8096	0.4675	10.7066	0.3182	0.1613	0.6926	0.0847	28.5123	0	0.4661	0.5124	0.1385	0	1.1162	0	0.839	1.5724	7.1901	0.3121	23.9838	0.1935	2.5978	1.928	4.5769	2.9092	19.3899	0.497	18.6325	0	30.9826	0	53.0224	2.3532	22.8609	0.4057	0.8621	1.5646	15.33	0.9313
Module: tan	Os03g0381500	3.1586	0	3.3879	0	1.962	0.0632	2.4834	0.3151	2.412	0.1258	3.8243	4.514	8.3223	0	9.7073	0.2895	10.3814	0.134	9.2749	0.073	8.8783	0	9.1152	0.1295	4.0814	0	4.0543	0	17.4944	0.4961	3.3954	0.1938	4.848	0.1912	11.1741	0.6795	11.5756	0.5777	11.9008	0.1053	24.2836	5.1394	17.8207	0.78	10.6309	2.4832	16.0125	1.3265
Module: tan	Os01g0794400	10.0704	9.7229	19.9182	8.2313	8.1321	9.2624	11.7413	12.176	8.4242	12.3936	17.9071	11.8245	29.5165	7.2954	21.1362	5.9992	81.4948	9.914	37.5168	10.5651	25.6642	9.3182	34.0968	8.6324	22.2621	3.7391	42.777	3.0614	90.4204	3.6905	26.0228	3.4609	33.3372	0.9756	60.3211	5.7954	69.7431	3.4204	59.4014	1.2086	91.5751	10.0689	88.4281	4.4213	29.4977	8.2216	83.2862	7.8947
Module: tan	Os03g0168100	0.6724	0.1742	0.714	6.3151	2.4662	1.7748	3.0851	0.9593	1.9898	11.4525	7.7861	134.848	3.3755	0.2017	6.0296	34.4041	186.773	0.8239	3.9975	0.3419	6.0294	0.7026	6.0811	0.3034	5.5216	8.6539	33.3039	1.2492	175.195	2.6623	20.987	6.4686	36.8326	7.6136	135.185	1.7405	138.711	1.4011	173.182	0.8631	336.283	5.8432	188.858	1.5222	4.9605	6.9334	116.083	4.815
Module: tan	Os03g0623100	0	0.0843	1.2287	0	0.0654	0.2147	0	0	0	0	0.1941	1.2444	54.2491	0.9373	50.5807	1.6404	9.7539	0.076	13.2846	0.6618	39.7114	1.5202	31.112	1.1012	0.25	0.4154	3.3743	0	33.3066	0.1874	0.518	0.2197	1.1863	0	17.1252	0	2.2398	0	5.4854	0	62.3636	0.2532	11.5573	0.0982	64.4763	0	4.7493	0
Module: tan	Os03g0268600	1.8957	0.644	5.5367	0.5104	2.3733	0.8886	2.0322	0.989	1.6019	1.1233	2.5946	2.1786	20.8105	6.8998	44.9711	4.6604	14.3502	3.8441	19.3371	4.4238	32.9901	5.9977	37.6257	4.697	3.2831	3.9004	9.7356	0.6495	20.7147	1.387	7.491	3.4091	4.114	3.1047	13.4334	0.8274	8.5252	0.8485	14.8521	0.6838	20.7363	2.9021	9.6162	1.5946	41.067	3.2044	12.174	1.3878
Module: tan	Os08g0110600	0.6533	0.3385	3.3146	0.5365	0.6565	0.4311	0.8269	0.6452	1.1225	1.0734	1.2987	1.3185	34.2198	12.1531	51.9843	15.0667	9.9744	4.8793	15.3416	12.7045	39.4579	13.3317	31.7121	11.7902	3.9529	3.1965	7.9273	1.062	20.4932	2.7277	8.6168	2.0949	5.3899	2.1757	14.5899	1.6427	10.5992	1.6899	10.235	1.1979	22.4873	4.4062	14.0132	2.3664	45.9809	3.2596	13.5492	3.7224
Module: tan	Os01g0866500	0.8632	0.1863	1.1316	0.5414	1.2529	0.1582	0.9104	0.3157	1.0071	0.2626	1.9065	2.2921	2.6798	0.518	2.4713	0.7252	5.0306	1.2311	2.1381	0.4876	3.1137	0.7663	2.8764	0.7031	1.5659	0.408	1.7985	0	5.7373	0.5523	1.4722	0.1619	2.0701	0.5589	4.1352	0.4256	4.6208	0.1378	4.0891	0	11.761	0.311	3.6675	0.579	2.9883	0.3988	4.899	0.0738
Module: tan	Os08g0444440	0.6592	1.2806	1.9443	1.184	1.4075	0.5437	2.1725	1.8083	1.6516	1.1732	1.8835	2.888	7.4138	0.3955	7.4731	0.7268	16.6694	0.1923	7.8372	0.8378	6.1141	0.5064	7.9835	0.0929	4.1148	1.0516	7.3618	0.9567	12.9225	0.4745	5.0588	3.6154	6.7974	2.1951	11.5683	0.6093	7.4532	1.6576	14.3783	0.6043	17.9775	3.5265	7.6775	1.1191	9.4383	6.3032	11.898	2.9182
Module: tan	Os01g0276300	1.0316	0.211	0.8328	0.1115	0.4365	0.1194	0.2863	0.2383	0.3628	1.011	0.9174	4.3253	2.2628	1.4987	4.6448	0.4105	6.1026	1.584	2.5822	1.3111	3.6933	0.8677	1.8538	0.6124	1.095	0.693	2.3957	0	8.6247	0	3.3954	0.6414	1.6146	0.1808	5.7024	0.0803	3.3633	0	4.3068	0.0996	12.9487	1.8309	5.4888	0.4097	3.6322	0.6321	4.2122	0.8361
Module: tan	Os06g0324400	0	0	0	0.7122	0	0.109	0	0.4351	0	1.8457	0	16.3197	1.3144	0	0.4087	0.2498	6.9633	0.8097	0.6875	0.252	0.4086	0.853	0.8233	0.7826	0	0.2109	0.8747	0.4604	20.0311	0	0.3381	0.1673	0.4754	0.4952	13.8078	0.1466	2.3391	0	2.3588	0	30.514	0.5143	7.3195	0	1.8168	0	6.1672	0
Module: tan	Os10g0542100	0	0	0.0938	0.1632	0.0799	0	0	0	0	0.0871	0.395	4.3901	0.1506	1.1447	0.6554	1.3021	9.678	0.4638	0	0.7071	0.3277	0.0977	0.0733	0.6275	0.229	0.3382	1.1398	0	20.2171	0.1144	0.0904	0.5366	0.8387	1.9852	18.4528	0	4.2983	0.3426	1.655	0.2915	31.3237	1.2371	10.9696	0	0.0728	0	9.8293	0.2448
Module: tan	Os11g0659200	0	0	0.133	0	0.1133	0.4959	0.1189	0.7422	0.2152	0.3704	0.7843	3.3527	0.7474	0	0	0.2841	54.5888	0	0.7819	0.1433	0.2324	0	2.3927	0.3814	7.2538	0.9592	8.0827	0.5236	56.3279	1.1361	13.3302	1.3318	7.3536	0.1877	27.9165	1.1672	67.8348	2.2679	39.7917	1.0335	66.9257	3.0704	89.3856	1.3611	0.9298	0.1875	83.905	4.5134
Module: tan	Os12g0510750	1.9806	2.1377	13.9238	0.7623	7.6291	0.363	2.089	0.3622	1.4967	1.175	2.5427	6.3112	26.1851	28.2266	41.423	21.8396	27.5174	11.9414	29.3544	17.5162	28.493	14.101	19.6479	24.1078	2.774	7.3731	15.4753	2.2997	37.3358	2.7327	7.1312	10.8635	12.2707	6.8705	28.2826	1.7089	18.5004	2.3717	32.8119	2.1184	71.2569	3.211	24.3025	2.6155	27.7549	6.725	21.8056	4.8291
Module: tan	Os02g0649300	0.6604	0.4528	31.442	0.319	0.5074	1.5806	0.8194	1.4067	0.4821	0.6382	2.973	2.4344	268.262	34.033	634.047	52.5277	78.1184	26.4281	191.639	30.1667	429.673	60.646	349.658	66.9929	27.3466	16.6096	53.9912	8.0288	135.794	19.183	42.5783	23.7326	33.762	42.7548	83.8731	10.4571	52.6712	2.5678	93.519	0.926	112.781	6.046	73.3165	3.5176	612.658	9.6906	58.3337	5.623
Module: tan	Os04g0658200	0.1666	0.2158	0.5899	0.171	0	0.2749	0.0879	0.9143	0.0795	0.4563	0.0828	1.062	9.5493	3.5999	7.0421	2.1001	2.2632	1.1668	7.5127	2.4357	7.2994	2.6631	8.3042	2.2555	0.5602	0.3545	0.7353	0	3.6859	0.9597	0.4737	0	0.3997	0.6937	2.7635	0.2465	2.212	0.1197	1.7349	0	4.7212	2.4856	2.0509	0.503	7.6357	1.5243	0.96	0.3849
Module: tan	Os01g0571300	0.4744	0.9216	1.1994	1.1825	0.715	1.6396	0.965	1.1527	0.6146	1.4475	0.6736	3.5633	5.4562	3.3347	3.5973	2.5622	6.6651	2.0562	4.7004	5.4265	3.4575	2.9991	7.9113	2.9811	1.7248	2.1625	2.9155	1.6525	9.9818	2.3417	2.1961	2.1731	3.2181	2.8211	5.4694	1.3031	3.1985	0.7304	5.8797	1.4912	18.0539	2.4611	5.5703	1.4319	7.2974	2.0851	3.9302	2.5568
Module: tan	Os12g0582800	18.9442	19.2838	23.1022	20.1581	21.5126	16.2643	20.6932	22.4681	20.5878	19.5516	21.9898	17.1026	53.0571	19.8486	53.4335	18.2369	49.0605	15.1707	57.5707	18.9739	52.3658	17.3984	50.1154	14.0354	33.8866	17.76	36.9473	13.4334	58.936	12.6209	33.8348	16.4721	33.39	12.0149	47.864	12.9073	48.257	20.9379	51.6395	16.2197	61.3434	19.852	54.0829	17.1601	61.3535	26.5464	44.6763	20.5398
Module: tan	Os05g0151200	0	0.0808	0.5892	1.2813	0.3136	0.8923	0.2633	0.274	0.1192	2.9396	0.8685	34.8061	1.478	1.5731	3.4096	5.1914	20.9293	1.0197	0.9276	1.1899	1.0936	0.4604	2.5919	0.6336	0.6594	5.4437	4.4064	2.3192	33.6977	0.7189	1.4903	4.5295	3.8919	3.9493	21.391	0.4616	15.9563	0.5381	17.8854	1.03	68.6738	2.0238	18.6003	1.2246	1.2584	1.1418	10.5474	1.634
Module: tan	Os04g0691900	1.1576	0.1499	1.4204	0.0594	0.9654	0.0891	0.9157	0.1778	1.1492	0.038	1.4497	0.123	7.916	0.5835	4.2713	0.496	2.1576	0.3107	9.4966	0.6621	5.8817	0.5692	7.7552	0.4439	1.0561	0.1477	1.9536	0.0538	8.0999	0.2833	1.5004	0.1172	0.7551	0.0771	4.4662	0.137	3.3576	0.0333	1.4347	0.0849	6.4415	0.6005	6.2784	0.1048	6.7573	0.4813	4.1434	0.41
Module: tan	Os04g0510900	0.09	0	0.1593	0.0924	0	0.0495	0	0.1481	0	0.0493	0.1789	3.4888	0.4688	0.216	0.371	0.1134	0.6743	0	0	0	0.4174	0.1106	0.0415	0.3552	0	0	0.2482	0.1045	4.026	0	0.1023	0.0759	0	0	3.7804	0	0.5751	0	1.4276	0	15.0684	0	1.5821	0	0.0412	0	1.3824	0
Module: tan	Os01g0702500	1.1574	0.1764	1.8476	0.2795	0.6841	0.0749	2.4415	0.2241	1.1048	0.522	1.3534	15.548	12.9616	4.494	18.9466	6.6065	9.6292	2.304	8.9719	3.2882	13.0515	4.4357	6.7854	3.6092	0.6539	1.5931	4.5811	0.7905	14.3058	0.8822	1.316	1.8384	2.09	0.1134	10.6128	0	3.2132	0.1957	8.7758	0	27.7525	0	7.7804	0.2055	14.1006	1.019	3.5038	0.1048
Module: tan	Os01g0705200	0.6172	1.7987	7.5858	8.7635	0.7753	3.8463	0.9765	1.919	0.6874	35.942	1.278	141.444	282.168	68.3948	290.776	211.047	126.943	45.0757	202.983	68.5754	266.007	42.4887	218.858	64.8009	3.3096	13.6766	40.5663	4.3	252.97	23.5481	16.6087	23.6109	10.4109	6.0806	178.947	1.9019	62.7606	59.7195	54.5684	84.1248	406.664	354.563	91.152	76.4606	380.38	178.863	78.3827	182.091
Module: tan	Os12g0530300	0.1909	0	0.4506	0	0.6715	0.105	0.7048	0	0.1823	0	0.2847	0	1.9893	0	2.8535	0	2.9508	0	1.3243	0	0.6887	0	1.1453	0.1077	1.3753	1.8277	0.7371	0	6.9106	0.8247	1.7367	2.2556	1.5569	2.2254	7.8101	0.9884	1.5019	0	4.2596	0	10.6572	0	2.6855	0	1.4873	0.9526	2.3465	0
Module: tan	Os01g0728700	0	0	0.14	0.2436	0.0596	0	0.1252	0	0	1.1699	0.118	8.8239	1.0679	0.2849	0.3058	1.1965	4.0017	1.1079	1.5874	0.1508	0.4281	1.0942	1.0952	0.2008	0.114	0	0.4582	0	19.0307	0.5126	0.0675	0.4006	0.5692	0	9.7089	0	1.2836	0.5116	0.8825	0.2176	25.4425	3.8481	1.7735	0.2687	1.3595	1.7763	1.3674	1.2793
Module: tan	Os08g0327700	0.1429	1.3885	1.2649	1.7605	0.1436	2.4365	0.0754	1.3333	0.1364	1.6438	0.4972	14.1197	15.2307	1.6297	8.7657	1.441	11.1121	0.834	6.9396	3.8151	8.3971	3.0749	12.3989	1.451	0.4118	13.0746	8.8295	1.3278	88.5941	1.4405	1.3002	9.7698	0.6856	2.38	55.0705	2.2199	6.3946	0.4108	7.9366	0.3931	130.431	1.3904	10.429	1.8336	12.3784	2.2583	9.6616	0.8804
Module: tan	Os02g0622500	2.585	3.1511	4.3571	2.8539	2.5102	1.72	3.0472	2.9797	2.426	2.522	4.426	3.0918	4.1561	1.6163	6.0227	1.5877	15.7276	1.6984	7.5116	2.6781	5.2165	1.255	3.7887	1.3476	7.3853	4.7133	6.829	1.8665	15.5714	2.8459	7.4837	6.6356	8.9396	8.2829	11.143	3.2772	12.6656	2.3099	15.3569	1.9517	25.0577	4.0007	11.4382	2.8194	5.554	3.143	12.3471	2.3416
Module: tan	Os03g0322900	0.8085	0	8.2514	0.3319	0.4468	0.5335	1.7907	0	0.2315	1.1069	0.8839	18.5921	186.732	1.1643	212.241	5.7565	13.9715	0.7548	85.113	0.8221	188.442	3.0313	111.166	1.0487	1.98	0.43	5.7076	0.3755	23.0031	0.9312	5.7453	1.0233	2.9472	0.7404	17.1611	0.0598	6.4787	0.1743	10.4212	0.593	22.2214	4.509	18.0876	0.6711	232.051	2.353	6.2101	2.5522
Module: turquoise	Os04g0604250	91.4391	5.0158	72.347	6.2936	88.8544	2.6026	82.8252	6.6107	86.5641	4.006	81.9002	4.1135	41.0617	2.8403	42.7979	4.3381	59.9511	2.0085	37.0921	3.6916	36.3655	2.9092	33.8512	3.7613	69.7369	2.2883	67.9933	1.2491	51.913	2.6329	59.4438	2.7232	71.3079	2.8659	61.6041	2.864	73.9342	3.8645	42.8782	4.7339	63.0459	8.2318	57.9681	3.5717	30.2646	4.2937	73.0439	9.4423
Module: turquoise	Os08g0463900	102.629	3.5902	94.5352	3.658	102.794	3.3387	97.523	3.9834	103.887	3.3975	103.25	1.1216	96.9556	3.2475	86.3229	2.9942	81.7223	2.6186	80.1717	4.9491	89.0399	2.9207	73.3898	2.7543	88.6759	4.2118	83.649	2.4523	80.5532	3.0406	89.5241	3.5643	101.68	3.077	81.6468	5.4666	77.8715	5.0265	60.466	1.6942	82.5507	5.2216	76.2928	4.8807	74.6347	4.9392	90.7431	5.4881
Module: turquoise	Os06g0564500	88.0718	0.8029	89.333	0.8484	79.7765	0.9999	86.1762	1.2245	83.832	1.1317	90.7798	0.7024	49.3223	0.8928	42.0004	1.6145	49.2389	0.9163	42.1774	0.7879	42.2541	1.3717	40.0833	0.8857	73.8265	3.3408	57.8514	3.2632	54.0571	2.737	65.223	0.558	54.1566	0.8258	56.7012	1.1614	61.3195	1.4253	43.4777	1.5914	58.4037	1.6081	66.9205	1.6217	41.7368	1.1684	57.6485	2.9275
Module: turquoise	Os05g0404000	17.4206	2.401	16.1472	2.0147	16.409	1.559	18.5747	2.3335	18.1641	1.5228	15.3634	1.4768	12.7042	0.8179	10.846	0.8589	9.0393	0.5408	15.1265	1.0395	13.852	0.8378	11.3964	0.6765	15.4999	1.2758	14.3744	2.2158	12.9094	1.884	16.8314	1.0582	14.6191	0.8625	13.6228	1.4919	12.4108	2.5855	8.758	2.0495	9.2222	2.2276	11.3834	2.4686	10.318	3.5817	14.2184	2.8547
Module: turquoise	Os04g0545200	26.9786	6.2322	27.9705	6.2229	25.6585	5.3622	28.8941	7.2868	27.9265	6.0784	27.9619	5.7584	19.0811	2.5409	19.309	1.8192	20.0409	1.9466	21.1683	1.8347	17.8203	2.2477	17.0807	2.5327	25.3553	3.6849	25.6897	4.5442	22.0921	3.7871	21.7384	5.089	21.418	2.6173	20.5338	3.9381	21.385	6.5457	16.5714	4.9409	21.3234	6.6569	24.7872	4.9866	18.6379	6.4553	22.9892	5.4338
Module: turquoise	Os08g0163400	108.152	1.7751	96.257	1.5548	110.801	1.137	104.837	1.5831	113.978	1.2378	111.053	1.5068	39.3758	1.2408	51.2246	1.3635	57.2478	0.7576	32.4952	1.2224	32.5127	1.7143	37.0765	0.6509	83.4776	0.9207	81.5832	1.2843	73.608	0.9346	74.6886	1.0145	77.7076	0.3203	66.2682	1.138	76.0777	1.2784	45.7497	0.529	63.4426	0.842	74.6116	0.6532	35.1888	1.3196	76.2754	2.1845
Module: turquoise	Os03g0308800	85.1561	2.2633	78.2258	2.4752	68.5877	1.4221	77.1149	2.3012	83.3039	2.6987	90.5073	1.5035	33.8976	2.1601	35.3739	2.5766	43.538	1.8353	33.3822	1.1771	30.0413	1.8689	30.9941	0.9658	57.0113	0.7435	54.0308	1.2174	44.7126	0.6038	60.3423	0.7963	54.4816	0.3492	48.3943	0.9046	54.3468	1.1049	44.1659	0.6408	39.1482	0.544	44.8557	0.7648	25.0941	0.9009	49.4759	0.7804
Module: turquoise	Os03g0735000	41.425	0.1294	38.8237	0.1539	41.1231	0.1923	38.3414	0.1371	44.9082	0.1095	42.1905	0.0796	29.7936	0.2399	32.6527	0.3463	19.6105	0.1166	30.2509	0.3811	31.853	0.3378	27.8747	0.2818	29.898	0.4252	25.7133	0.2901	23.9634	0.5036	27.3566	0.3795	25.3098	0.1248	23.6991	0.0739	29.4791	0.4667	18.4805	0.2749	20.897	0.2916	31.4731	0.0754	31.505	0.4571	28.4218	0.1924
Module: turquoise	Os03g0110900	128.178	1.1082	117.871	1.1709	135.102	0.8065	133.126	1.6095	153.776	1.0264	147.077	0.8655	51.4017	2.7871	66.8108	2.6699	72.5825	1.7116	42.2659	1.5535	47.0301	2.4541	39.6655	2.3436	121.731	1.56	122.512	1.4192	105.394	1.7011	122.76	1.3064	125.577	0.407	105.129	1.5065	115.693	1.7564	70.2912	0.8965	104.229	1.2682	103.65	0.3689	42.1907	1.0164	116.386	0.6901
Module: turquoise	Os10g0573000	96.3843	2.3096	87.1402	1.9828	88.0103	1.9937	89.8698	1.9568	97.1383	2.0833	98.1891	2.4623	70.4876	1.9974	59.3963	1.985	45.4304	1.7688	60.9268	1.8509	63.5289	2.7766	48.9284	1.9107	67.2481	2.4657	54.5521	1.6565	50.6766	2.824	74.5457	2.4578	64.662	2.7713	53.9181	1.1429	51.3436	5.4666	47.0021	5.831	52.6064	4.3558	53.8721	2.4221	53.9817	4.8439	54.583	5.6751
Module: turquoise	Os04g0627000	19.8069	0.0231	18.9562	0	18.8825	0	18.8613	0.0195	19.0596	0.039	18.2344	0.0189	12.7204	0.2138	10.6846	0.2918	13.9138	0.1663	15.3186	0.0453	11.5469	0.1971	17.2094	0.2009	15.7721	0.2273	16.6023	0	17.2449	0.359	16.2422	0.7214	16.3349	0.1186	17.2104	0	18.0912	0.256	16.3185	0.0327	15.9973	0.0924	15.5794	0	10.5935	0.1185	20.2348	0.2194
Module: turquoise	Os06g0340200	13.4539	1.0394	11.8063	1.0254	10.7871	0.6844	13.8529	0.9615	12.2718	0.7892	13.8846	0.7828	8.1979	0.7665	7.005	0.7946	10.3311	0.7549	7.7969	0.895	7.7896	0.8757	6.9444	1.3023	9.4842	0.8013	8.608	1.5213	9.278	1.2614	10.7256	0.6219	9.1513	0.4908	9.2156	0.8115	11.4167	1.2708	7.8512	0.7507	9.7989	1.6993	11.5388	2.1379	7.8642	1.4708	13.3404	1.5131
Module: turquoise	Os05g0589200	191.285	15.4402	178.15	15.0252	193.339	7.6509	203.123	11.0143	215.45	14.4462	200.779	6.6199	142.669	16.003	181.953	18.7218	112.881	16.0678	124.975	15.5661	196.92	20.935	163.611	15.4895	192.512	15.1847	168.351	17.2501	146.92	17.4761	159.111	16.3277	138.483	11.584	137.682	18.3827	144.897	10.9864	96.5013	7.7735	112.891	8.2243	169.169	7.82	156.034	10.3649	155.527	11.1038
Module: turquoise	Os12g0564400	45.4059	0.8209	38.9379	0.4646	46.2168	0.6472	44.404	0.6955	46.7991	0.6446	41.5745	0.2885	41.4198	2.7708	32.9878	1.5974	27.0096	1.0037	45.7959	2.0713	42.8309	1.6695	29.5351	1.4807	34.4336	0.5778	30.1112	1.0513	31.9045	0.8473	46.8908	1.3752	40.8212	0.8292	28.677	0.4017	27.2852	0.3253	20.1986	0.498	32.2355	0.5284	24.7922	0	32.1927	0.6776	33.0682	0.6274
Module: turquoise	Os05g0568900	64.5006	9.2772	60.7288	7.492	58.7459	4.1261	63.1359	6.8497	67.0713	6.6499	66.6159	5.7968	43.3232	4.0116	41.1321	4.0405	34.7591	2.9852	47.314	3.1213	38.7398	2.39	34.655	2.9238	50.644	4.1358	39.9949	4.5942	40.9791	4.7634	44.9095	4.2598	44.5652	4.2027	40.1596	4.6414	45.6443	7.6461	26.5146	6.2542	39.4611	5.1317	44.1963	5.508	35.7587	4.8217	48.0497	5.41
Module: turquoise	Os05g0365000	38.8775	6.2565	37.1565	3.9093	37.7586	4.444	37.4277	4.4344	43.9827	4.2225	39.1944	3.1575	12.1863	3.2889	16.6121	2.2243	29.2354	3.3605	10.631	2.4794	10.8189	2.2839	11.8301	4.4531	25.3823	2.5689	32.4834	4.3146	25.4502	4.7479	31.7927	1.8029	37.3391	1.5468	26.1371	2.6106	28.7719	2.5363	28.2773	3.6622	25.6505	4.4579	29.439	3.7153	12.2588	6.4887	32.4663	4.5776
Module: turquoise	Os01g0889800	45.1575	2.0943	34.9925	2.024	49.7746	1.4313	49.5408	2.4236	49.3166	1.7278	37.8264	1.55	39.5211	3.3605	31.4621	2.7832	29.4039	2.163	45.9928	2.807	47.191	2.5695	30.0251	2.2241	34.1267	0.7551	30.2784	1.099	29.6188	1.7602	40.6714	0.6656	38.06	0.197	29.1251	0.7583	27.881	2.1535	21.429	1.2293	31.4519	2.1483	29.7112	1.1904	30.5397	2.2956	35.0188	2.9758
Module: turquoise	Os10g0498300	7.4858	0.1134	5.3716	0.1348	7.6539	0.0481	7.9875	0.0961	7.2291	0.0959	6.7005	0	5.0999	0.1051	5.1887	0.2758	2.4601	0.1533	5.8555	0	5.6397	0.1614	4.0397	0.3456	5.928	0.2794	4.8771	0.1017	3.829	0.2521	6.0724	0.1478	5.7532	0	5.13	0.0647	2.2812	0.0629	2.3873	0	3.1468	0	3.4634	0.1321	3.8111	0	4.3712	0
Module: turquoise	Os02g0643500	106.889	2.9165	100.281	2.3112	120.645	1.0538	111.169	1.8927	124.852	2.7812	114.904	2.6971	92.7543	2.2999	95.7491	3.6226	81.9861	1.7332	102.821	3.41	95.2016	2.827	82.5439	2.1075	95.3848	1.5287	88.6799	1.6689	87.1355	1.9314	112.054	2.0214	104.283	1.1168	89.3015	1.559	99.7265	1.5835	86.505	1.142	99.0252	2.1749	90.6763	2.6753	81.5762	2.7887	117.504	3.8364
Module: yellow	Os08g0448100	0.3821	7.6348	1.3524	8.3473	0.7678	20.2883	0.3454	7.6067	0.2605	11.2988	0.7052	16.1751	2.223	36.3551	1.6877	42.8521	4.0898	43.8846	2.055	31.5641	2.1939	49.7178	3.1228	41.5548	0.7863	145.25	1.6256	56.7853	1.4267	83.7676	1.6135	163.229	1.4661	254.834	2.474	109.309	3.5957	36.8632	4.6542	52.1419	3.2312	21.5913	2.495	22.5705	1.3505	42.7539	2.0124	17.9027
Module: yellow	Os06g0326700	28.5014	59.2531	36.4916	65.1499	32.4823	84.8089	31.2239	62.9152	25.6613	63.3599	33.993	69.4135	30.0255	61.7454	33.2798	68.868	51.6337	96.3437	26.1624	71.3733	27.593	75.5866	35.2942	67.4454	40.0872	192.446	46.6915	116.148	60.3032	137.342	40.1832	192.277	39.1592	304.884	52.2437	177.868	49.0319	84.3944	53.6017	129.671	68.8576	59.1923	47.7162	60.8297	32.9262	74.9214	42.541	52.1571
Module: yellow	Os02g0743200	6.0307	23.5887	13.1636	25.9355	7.3931	36.0122	4.2616	26.1405	6.4474	23.2506	7.1928	35.167	33.5867	45.452	13.7368	43.3952	15.929	32.0907	26.4706	41.2369	24.0539	49.0764	33.6135	42.7848	9.5565	110.968	10.9097	39.3536	15.1577	67.4623	10.1482	133.024	13.7109	183.258	16.1344	90.5364	17.7295	27.2977	22.4831	30.9619	18.2585	18.0681	12.6702	32.3102	17.906	39.3154	13.0629	17.7376
Module: yellow	Os02g0755400	2.1817	12.0627	1.7752	13.4973	2.1771	13.1544	1.936	11.5246	1.9389	10.7447	1.4655	11.267	2.3514	22.9145	2.7139	19.909	11.26	20.5952	3.5928	25.9309	4.0473	26.8187	4.1237	19.0578	2.9045	49.1616	4.7301	19.6368	5.9146	28.9835	3.4386	55.8893	4.1136	87.3087	6.5704	38.6556	10.9622	12.7346	13.8145	11.6147	8.5381	10.7915	12.6444	12.4209	3.516	12.9867	9.7194	6.3716
Module: yellow	Os01g0748600	19.2528	49.8331	22.681	51.4748	19.7606	49.0892	18.3157	47.2043	20.01	42.7231	22.7398	47.6637	44.0384	133.184	56.1268	143.269	23.3901	109.305	44.1986	135.426	57.6436	161.245	48.5381	121.046	20.8403	184.515	24.0989	83.8051	24.3951	110.533	22.8625	187.787	24.1821	267.6	24.4461	125.068	23.3073	33.2156	26.1054	40.7616	26.9037	30.515	24.1294	36.2198	43.7973	33.6365	22.4426	30.419
Module: yellow	Os12g0583700	2.113	10.6132	5.3511	13.9649	2.434	32.419	2.1743	8.257	1.8694	13.8297	3.7905	24.1957	4.2468	43.1102	4.5682	49.8143	25.3426	50.3978	4.2894	36.5503	4.2493	52.7099	6.896	42.0853	3.3657	188.017	10.4034	86.052	14.7152	114.562	6.563	233.709	9.2451	372.772	16.1242	186.833	26.6035	30.9561	34.5436	23.4355	26.238	24.3308	25.3251	27.8451	4.0617	50.483	19.0805	16.8248
Module: yellow	Os03g0761100	30.5564	52.3743	44.1837	49.5137	27.1845	105.852	27.5422	49.1561	27.7269	53.8975	35.5497	82.97	122.347	218.558	114.117	238.936	94.0487	243.252	136.959	209.961	119.689	237.658	117.835	190.598	63.8883	342.445	72.7512	164.735	86.0626	218.278	72.2371	407.359	73.8134	554.018	84.0584	266.536	90.0481	92.5228	141.151	105.58	105.027	54.1461	81.3834	69.3662	115.791	92.7776	79.2046	59.9462
Module: yellow	Os02g0671100	0.8856	7.2643	2.239	19.5209	3.3476	44.5673	1.023	9.9031	1.4894	15.9813	1.4251	30.0558	3.5948	61.3899	7.1717	83.3286	21.9612	81.8368	5.3065	69.677	6.8671	99.3756	4.9033	70.0147	2.754	261.224	7.8614	139.258	12.3375	151.236	4.5071	355.992	9.3044	565.107	10.7694	265.462	17.4148	38.9645	33.4085	72.2203	20.3639	16.5177	21.6863	39.0135	5.5263	66.9064	14.5114	18.8322
Module: yellow	Os09g0364400	2.2679	20.6385	3.6616	29.0353	2.6986	151.676	2.0143	14.2771	2.7345	35.5598	3.4997	108.716	8.4226	129.569	4.9825	250.072	13.2481	322.033	3.9028	115.069	6.643	188.032	8.6466	212.107	2.9805	666.511	5.9249	268.874	7.4402	417.155	3.2572	730.935	5.3816	1281.41	7.1257	633.179	18.1323	71.2664	24.38	67.1903	15.2425	72.7607	15.0569	56.3838	7.0006	131.808	12.0104	45.9514
Module: yellow	Os01g0750500	2.1635	9.0485	2.3931	17.8572	6.4313	29.1951	3.2326	8.8535	4.5175	9.3798	3.8974	13.5486	25.1022	44.5183	21.7877	54.0739	1.4776	43.1819	23.4904	48.0057	29.3587	58.7863	15.7222	35.8913	3.2466	266.928	3.6294	133.455	0.9969	172.61	4.4073	338.196	8.6475	548.083	3.3884	216.13	1.4181	23.3165	0.8938	20.3306	1.0292	23.7341	1.3868	31.9029	20.198	27.4349	1.1425	10.4111
Module: yellow	Os03g0258200	1.3921	13.2363	5.1677	16.6924	3.0023	16.1674	0.9311	14.009	1.4908	14.3171	2.3622	16.5531	89.6893	131.491	163.423	108.55	37.7478	68.107	88.0034	104.127	152.813	100.126	87.2579	88.2697	4.3694	164.815	20.1116	70.4097	27.6832	91.2124	8.5701	202.728	12.9303	338.689	21.5453	151.156	20.8979	39.4699	52.55	57.1498	43.8165	18.0105	19.4896	34.8948	128.937	51.8913	19.6114	17.5672
Module: yellow	Os01g0261200	22.0908	59.839	32.2365	74.0813	23.3686	63.9663	24.5009	63.0048	24.1274	76.3588	28.8029	67.3389	48.2242	145.456	68.9194	155.902	31.8489	133.576	57.1441	145.913	60.0015	148.861	57.9298	126.713	29.2493	291.095	36.7083	132.851	35.1755	174.828	30.1523	402.798	30.5324	538.8	35.3301	226.494	33.4845	140.409	36.4626	152.999	38.7656	70.2003	33.1466	70.9773	56.5074	127.657	30.5742	77.1274
Module: yellow	Os02g0455400	5.0566	4.1965	4.9814	4.5349	4.2917	13.8749	3.3656	5.1717	4.8267	3.9252	4.733	8.7603	7.3467	5.3025	8.8042	9.218	24.7381	12.3168	10.5552	7.113	9.0568	9.8367	8.2904	9.9668	10.1368	236.744	17.3287	111.155	14.9549	160.581	11.8334	305.722	18.2724	478.11	14.9794	220.666	21.2869	54.3192	24.7274	49.4184	16.6484	37.8847	15.6222	44.1575	7.603	72.3364	15.0079	31.9777
Module: yellow	Os01g0748900	17.3546	33.4937	25.2242	38.2769	14.5206	34.5745	18.3762	31.4642	17.3734	35.6369	22.4302	38.4942	42.1873	89.4021	37.1644	101.686	24.5429	80.5259	40.7562	86.8334	46.5183	104.475	47.2637	82.4229	22.4424	81.8104	23.8344	46.939	23.5624	57.7394	22.0199	84.6243	21.8464	115.015	24.2415	62.937	22.3018	36.2733	26.5251	47.7106	23.6489	20.3436	23.3156	24.2243	41.6766	32.2459	23.6746	26.4073
Module: yellow	Os01g0800300	9.7139	22.9831	11.2738	26.5219	8.3254	26.0778	8.0354	18.7064	7.3027	23.8515	10.6958	25.4571	30.067	37.5639	38.6405	30.9232	20.1589	30.3017	33.3714	42.0408	36.3813	33.9105	36.4709	32.2957	12.7741	99.4677	15.9324	63.7668	23.4893	65.6744	14.0042	128.417	16.2614	155.081	22.9517	94.7028	21.5989	57.2478	25.0542	72.1757	27.6515	45.3302	22.687	38.9495	40.727	63.4043	18.3117	31.7741
Module: yellow	Os06g0146600	0.5534	11.9161	2.3669	12.0702	0.9036	10.8025	1.3862	7.9706	0.6603	12.35	0.6875	9.405	1.1794	6.6415	1.8538	6.6253	4.5355	13.5615	1.3023	8.4403	0.713	6.9729	1.4044	8.8947	1.3952	157.305	1.6787	55.1009	1.3909	99.3931	1.1011	181.189	1.8581	286.113	1.8354	90.0379	7.5498	28.1312	9.1223	18.8991	2.8081	16.957	6.4458	10.8575	1.6482	34.8582	3.0287	16.0851
Module: yellow	Os05g0519300	0.2397	2.2253	0.7543	4.7572	1.2848	4.6138	0.6743	1.8415	0.8391	3.4135	0.3971	3.0133	1.3624	12.2758	4.8595	11.279	1.9461	6.8541	1.7419	10.1567	3.2533	11.1987	2.2123	6.6699	0.7675	20.144	1.0578	12.2481	1.2051	12.7706	1.6355	28.1195	1.3799	39.0531	1.3252	20.3889	2.1215	0.8038	2.2978	1.1722	2.1964	2.7984	2.0021	3.1357	3.2588	2.658	1.2583	0.6153
Module: yellow	Os06g0147300	0.0852	1.7665	0.1006	1.3999	0.3426	1.2187	0.0899	0.9354	0.1627	1.1204	0	2.1731	0.2422	12.3788	0.9665	11.387	1.4372	8.3559	0.8446	7.584	0.1757	9.6405	0.236	8.7494	0.3275	41.5254	0.9403	18.8062	0.857	27.368	0.6785	49.777	0.3271	69.9754	1.5078	37.6988	2.8497	2.2049	2.0285	3.7513	2.6674	1.9901	1.124	1.1579	0.6249	5.8124	1.8988	3.0192
Module: yellow	Os02g0514326	0.0564	3.8205	0.1108	3.1048	0.1133	3.9258	0.0198	2.804	0.1973	2.49	0.1867	3.2928	0.0356	4.3293	0.0775	7.1268	0.1232	7.0817	0.2979	3.6536	0.1549	4.9426	0.0867	4.874	0.0541	13.8686	0.0414	6.3266	0.0378	11.4961	0.1282	15.2201	0.1081	26.6227	0.0208	12.0606	0.2771	2.3759	0.1304	1.6881	0.0159	1.1209	0.3799	1.4178	0.1205	1.0624	0.4185	1.4466
Module: yellow	Os04g0385600	0.9382	4.58	2.6821	5.6294	1.5228	19.7217	0.5328	4.4348	0.6544	7.0348	0.538	15.254	7.8606	54.4769	7.1778	45.1536	2.1292	49.1386	8.0799	63.1962	6.9543	65.3365	5.8937	59.2568	0.3812	84.0489	1.3135	62.8461	1.1971	70.3391	0.4103	95.7901	0.6231	165.884	1.1967	87.5264	2.9092	21.3106	2.254	32.1547	2.5023	17.5965	2.1569	20.0945	6.4811	31.0845	3.1873	12.0575
Module: yellow	Os07g0481300	1.5382	3.9678	2.2724	4.2057	1.7145	3.7954	1.5815	4.0284	1.9495	4.2048	2.0941	3.5011	1.6895	3.7076	2.5447	4.0072	3.0994	4.5403	1.9467	3.3515	2.7977	3.9883	2.4692	2.9888	3.3022	11.0262	2.9372	6.1537	3.4698	7.295	2.6455	12.5436	2.6784	18.1438	3.3868	10.1712	3.6095	6.7611	4.2038	10.95	3.1374	3.3698	4.1361	3.609	1.9427	6.4061	3.1672	4.2796
Module: yellow	Os01g0175100	16.4507	38.684	32.6246	47.2412	27.0227	83.8473	21.1035	33.9278	23.0532	30.7966	24.0037	47.0913	277.037	90.0323	238.036	77.0425	39.7771	58.407	177.964	104.912	217.584	106.417	185.828	94.0231	16.7514	232.052	24.0017	144.817	23.4594	146.806	18.3063	284.029	30.3865	396.202	21.2821	262.47	31.3745	53.8164	28.5732	65.6753	43.7591	44.1852	30.4605	48.0693	176.948	86.7316	31.6343	31.6204
Module: yellow	Os03g0231600	3.2191	3.8218	3.7629	5.3231	1.9168	10.0302	1.226	2.6493	1.4226	3.3952	3.4068	8.1681	2.7102	6.3672	2.089	10.1792	12.4512	13.1127	3.1009	7.5765	2.1811	14.1796	3.7957	8.6063	5.6106	49.3918	6.214	22.8418	7.3417	38.6207	5.1173	53.1196	5.1753	87.8933	6.7221	41.1758	7.8834	9.1229	14.2447	9.9467	6.1757	5.3734	10.2709	7.2873	4.5615	12.1445	6.5707	5.5078
Module: yellow	Os01g0974800	16.2109	18.0873	17.3051	19.4717	13.5861	44.2724	19.2933	20.3303	15.3624	16.2949	18.5532	27.8778	17.4811	14.6824	19.095	15.211	22.2385	35.5408	23.3395	11.8626	20.5648	15.6716	20.3775	20.5268	17.9276	120.121	17.6751	49.8682	15.7569	82.1398	18.2986	141.568	17.5928	218.857	16.706	113.172	19.642	17.4456	18.4854	21.2742	19.7035	24.1499	21.0772	19.7345	18.3712	18.1286	24.0946	18.8393
Module: yellow	Os03g0796900	5.6623	10.3763	5.0461	10.9742	4.5396	23.0528	5.432	8.7584	4.8587	11.2159	4.6998	12.3165	8.5581	25.5189	9.8405	39.5871	9.9863	38.7311	9.5493	26.1067	10.8023	43.91	7.5876	26.1573	5.9586	52.8564	8.3389	28.3968	7.1158	38.8952	6.1983	51.3888	6.7897	99.0447	7.4918	54.4368	7.2849	16.7924	11.4972	25.0168	10.5195	15.4299	7.9692	15.8636	6.8173	20.0856	7.241	11.0847
Module: yellow	Os11g0210201	5.4659	32.2106	43.5309	61.9915	10.8931	44.9816	6.9178	32.7891	4.5218	79.9215	14.7584	67.1524	93.7041	102.769	67.3211	136.613	30.7171	154.886	79.2489	113.814	67.8815	150.058	104.073	160.802	20.735	260.834	26.428	165.645	36.7262	160.269	21.3371	372.517	21.4103	470.068	34.7453	225.42	22.3031	51.4455	34.0524	43.5963	42.6805	49.5055	14.6547	37.533	104.102	71.5084	21.7615	38.1565
Module: yellow	Os06g0662200	4.4924	18.5019	5.6818	18.3111	3.41	41.0869	4.8063	13.0515	5.4297	14.0179	5.3966	22.76	5.2346	11.132	8.6942	13.7256	1.3017	17.1979	5.8921	15.7325	7.428	16.7658	4.6824	15.128	2.4521	103.401	2.7094	76.5552	2.242	79.2411	2.3151	138.597	3.8445	215.256	2.6083	118.551	1.4618	22.7566	1.6984	20.2079	1.9953	14.4197	1.6194	25.9977	5.9531	17.4148	1.7626	9.1077
Module: yellow	Os05g0316200	11.8769	37.4067	17.0024	36.2172	11.1808	33.1434	12.2059	34.1398	11.608	38.0265	14.2621	36.5757	16.8547	36.7532	23.8559	38.0054	20.5021	46.3797	16.8685	45.5173	20.4918	40.2867	20.536	41.285	20.0489	163.013	21.44	104.253	21.0489	101.077	20.5556	216.792	18.7621	229.514	21.7791	144.551	22.0602	54.6368	23.09	51.4331	22.1966	40.245	18.5292	43.3123	19.2234	90.4681	18.9615	43.4759
Module: yellow	Os02g0582800	2.9425	18.9114	3.4718	18.0639	2.7894	15.2027	2.3422	17.7898	2.2788	15.3237	2.759	16.4528	5.8895	21.2547	9.0411	11.4042	3.224	15.4192	4.4557	28.2251	5.7792	12.6258	5.0208	17.9718	1.8662	96.488	1.5923	39.9679	4.2979	46.3596	3.1562	111.687	2.3434	146.983	3.1303	90.9026	1.3647	17.7907	1.211	12.623	5.6812	16.2735	2.2938	11.8979	6.8176	23.1751	1.7911	10.8576
Module: yellow	Os01g0855600	0	2.1144	0.1959	2.9821	0.1946	5.0817	0.0292	2.0648	0.0264	1.9093	0	3.3799	0.6552	9.431	0.5133	10.1123	0.3888	7.3297	0.0822	6.5413	0.5704	9.9322	0.4085	7.3654	0	10.124	0.1831	5.7189	0.3338	5.4577	0.0315	13.4958	0.2389	19.0281	0.2753	10.027	1.0338	3.0616	0.6036	2.7397	0.7254	1.0407	0.8513	0.7934	0.5071	4.4177	0.6589	2.0453
Module: yellow	Os04g0151700	0.5749	11.7652	1.628	11.4479	1.8487	15.5536	1.334	13.3751	2.0854	8.9418	2.4	10.7478	3.9207	17.6636	4.622	20.7213	1.8309	39.0464	2.2786	22.3599	3.7923	19.506	2.6527	14.1364	1.6565	64.0849	2.4099	44.5933	0.8092	39.234	1.8303	88.6839	1.434	136.893	2.9238	60.5455	0.2261	7.4354	0.228	2.9517	2.2366	8.2023	1.5162	7.8091	3.1612	7.2667	1.0599	4.9578
Module: yellow	Os02g0273000	0.4745	0.7169	0.7153	1.2175	0.7151	2.1451	0.6394	1.0702	0.8555	1.4724	0.7336	2.0159	1.4481	2.4359	1.3312	2.7903	1.3332	3.1682	3.5258	1.8761	1.8202	3.6291	1.4838	3.2406	0.886	8.6351	0.8723	5.8765	1.166	6.793	0.7493	10.7655	0.9609	16.5905	0.9617	6.316	1.581	2.3105	2.7965	3.3349	1.5827	2.1538	1.2744	1.5117	2.3914	1.7097	1.4375	1.6236
Module: yellow	Os05g0132700	0	2.8138	0.361	3.2663	0.0307	8.0762	0.1614	1.9475	0.146	3.8207	0.2433	5.5903	0.7825	50.4573	0.3469	64.9754	3.1813	59.167	0.4548	33.9128	0.4415	47.846	0.7342	36.3767	0.6465	30.9835	0.8101	19.6124	1.1383	23.5247	0.8698	31.2946	0.9687	43.9188	0.7442	18.6918	2.3167	4.9247	4.9454	3.5908	2.1996	2.1034	4.2769	3.8791	0.673	5.1397	2.3739	2.1204
Module: yellow	Os05g0344400	14.428	9.6123	12.5531	10.4407	14.0284	10.5588	12.0971	9.2262	9.6604	6.5939	10.0587	6.8356	12.3383	16.5056	11.9821	17.0702	12.8332	15.9886	11.8786	15.3032	13.1583	17.6721	8.5728	9.483	10.9656	269.93	17.6897	101.119	15.3924	172.302	12.3329	300.603	16.8278	462.755	17.9587	193.979	13.8799	30.8005	20.5835	37.684	16.6346	32.5117	12.8655	30.6253	9.2743	56.7066	13.7531	18.7811
Module: yellow	Os11g0127600	0.6266	3.3316	0.7782	3.5203	1.0604	2.8651	0.7304	1.8818	0.9759	3.5037	1.6389	2.9424	1.6867	17.8103	2.4133	19.8239	3.6449	17.4716	2.4507	16.724	2.0054	20.9995	1.7651	24.0662	1.0769	80.1845	2.4737	30.7105	1.3262	49.0936	2.8497	108.141	2.7523	150.183	2.3698	67.4108	2.0753	25.685	5.2645	23.8249	1.4503	12.2757	1.7974	14.6327	2.3875	30.9328	1.1399	11.1724
Module: yellow	Os01g0908700	28.427	52.7489	37.7818	56.8516	23.7391	76.4452	25.4588	49.6236	25.4681	69.4707	33.0519	81.7997	77.7822	174.215	48.567	179.796	52.9624	183.451	95.2848	174.251	80.1122	173.3	88.6497	174.244	36.9437	164.094	40.1659	102.749	48.7424	114.682	37.6059	162.56	34.832	234.824	47.4948	122.641	57.2892	88.6341	69.2547	93.7932	61.6754	48.3259	56.1403	62.3563	70.7855	61.3258	49.4094	54.1348
Module: yellow	Os01g0667900	14.9506	37.7657	41.4094	57.1356	23.4399	77.8339	14.594	38.7461	15.3843	53.712	12.9097	68.9821	126.791	312.274	150.813	280.202	29.198	208.055	101.696	246.482	182.17	307.15	116.193	226.988	20.9265	207.846	31.1698	114.868	33.9523	127.847	24.3527	232.987	28.175	291.042	34.6974	219.168	22.154	48.2995	40.6861	45.4939	30.6672	29.0856	22.0437	33.2045	135.112	51.2259	22.8449	31.1861
Module: yellow	Os03g0776400	0.4273	4.5662	1.2605	5.7751	0.2147	8.3025	0.601	5.471	0.3059	6.3577	0.4955	6.8464	0.7758	3.4618	1.2112	3.9492	0.8672	2.618	0.2117	6.1102	0.734	4.7716	0.2629	4.1371	0.8892	24.6198	0.6285	18.0284	0.7519	17.1754	0.6478	29.8097	0.7174	46.0133	1.496	29.2856	1.0154	5.4755	1.024	4.3749	1.4155	3.464	0.9391	3.9233	0.5874	8.8836	0.6838	1.8645
Module: yellow	Os10g0490900	0.4597	7.6742	1.0245	16.567	1.5911	8.2574	0.5387	10.3697	0.7314	14.2663	1.5738	12.1532	1.2095	6.9884	1.2635	12.9384	8.8987	12.5173	0.6073	9.1538	2.1058	21.2859	0.8013	9.1028	1.4717	95.8355	3.775	28.5873	2.8758	57.0663	1.7423	140.255	5.488	185.155	3.9529	96.1753	10.6975	17.0287	11.2941	13.9551	6.4364	15.7672	4.4453	16.4969	0.6553	37.8019	5.4536	14.3943
Module: yellow	Os04g0654500	0.3839	7.4034	1.9629	12.2593	1.1573	17.8732	0.6749	7.4897	0.5701	14.2034	0.7208	18.9847	3.5959	22.8326	3.957	40.3175	12.3459	40.3702	2.3669	31.0659	4.1326	37.8074	4.4088	33.6312	1.3929	73.1377	5.8347	39.7237	6.0041	46.7359	2.1341	65.0082	3.9693	92.6198	8.8659	57.6673	14.4701	22.1284	17.5103	27.9232	14.6465	27.2756	14.6244	15.837	5.0037	30.576	8.0275	13.7288
Module: yellow	Os02g0575000	7.4273	44.678	20.8371	60.9016	11.9412	68.0661	6.1798	43.9216	10.2407	56.4023	11.8113	73.7189	41.4272	263.646	49.9288	227.444	26.7445	196.455	38.5124	195.72	47.1198	226.022	62.5992	265.372	5.2309	576.505	17.66	191.454	18.419	265.663	10.2276	786.347	16.704	1049.13	26.093	412.078	32.4568	52.6524	51.2226	51.7506	40.8279	37.9969	26.5514	37.2394	47.4178	88.2484	27.1936	38.7597
Module: yellow	Os02g0190800	20.9052	26.7171	22.7868	24.6894	24.1363	30.9828	23.2532	23.9658	21.3426	25.4367	23.4265	29.5573	27.2746	41.2051	27.0044	44.14	17.6677	43.2159	22.8734	37.1272	28.9652	39.3127	24.4973	38.0228	25.9273	53.2309	24.8922	40.0271	23.5922	43.5509	22.6278	49.942	26.1963	77.9153	26.9757	49.7076	23.3451	34.715	27.3166	40.0447	22.5381	25.0036	23.1535	30.7662	26.2305	30.3918	22.7567	25.0498
Module: yellow	Os10g0340301	0.0152	0.2956	0.0359	0.9682	0.0764	3.798	0.1284	0.3506	0.2178	0.6166	0.1815	1.6483	0.1153	0.5843	0.0941	0.7286	3.4058	3.4443	0.1357	0.8895	0.1254	0.505	0.1825	1.4071	0.5114	92.0752	1.158	34.5893	0.9789	54.453	0.7438	117.213	1.5179	162.712	1.5979	74.7095	4.1736	1.6834	5.9586	2.4549	1.7884	1.401	4.36	1.2858	0.2649	2.3278	2.0684	1.6634
Module: yellow	Os08g0445700	0.9344	2.1828	1.6734	5.2921	1.6264	10.5145	0.9679	2.5818	1.0672	3.5638	1.3599	6.0791	14.6506	26.0129	16.7853	29.2074	5.9389	26.7344	17.6404	28.0787	22.9755	32.3674	17.0147	22.8854	1.8429	35.9918	2.7977	19.2197	3.1203	30.437	1.7834	39.5372	2.4971	66.0134	3.1175	36.9458	7.4157	6.7137	7.4285	10.4636	6.4912	5.6051	7.6127	7.2274	15.2911	9.3795	5.1138	6.7064
Module: yellow	Os12g0114000	1.3316	21.0249	1.1223	19.265	1.1469	14.3653	0.3344	17.1874	0.4237	18.5439	1.5756	14.8851	11.2313	169.477	8.6924	175.643	1.2473	126.608	10.3039	184.318	11.2409	189.105	9.07	151.125	1.4007	218.655	2.9378	69.2108	4.5901	121.967	2.0188	297.613	1.5816	382.424	3.7855	162.819	0.8105	45.651	2.3263	49.5309	5.5235	35.1999	0.4459	28.1356	6.9732	48.6155	1.1202	28.1223
Module: yellow	Os09g0337300	2.5681	4.0683	2.2287	6.0995	3.2203	5.3449	2.4175	4.1456	2.2893	4.1145	2.0673	4.8468	2.9751	5.9348	3.9594	5.4027	4.9697	5.7459	3.5328	5.9884	3.5655	9.027	2.8007	4.9313	3.1594	18.5556	3.8863	10.8431	3.35	12.589	3.6438	22.8164	5.2324	38.06	3.496	21.974	2.5668	5.6116	3.8089	7.355	2.9077	4.2391	3.3769	6.278	2.9758	8.9653	2.1519	3.8238
Module: yellow	Os12g0186600	0.5307	1.3747	0.3131	2.1244	0.4	2.1302	0.3638	0.9609	0.3293	1.2207	0.2901	0.6201	0.754	7.7703	0.8205	8.3264	0.1491	8.0818	1.3934	8.9709	1.4221	9.329	0.5142	5.6566	0.5352	54.3574	0.5561	23.9091	0.2935	35.0318	0.5732	79.4886	1.7818	97.2462	1.2321	45.5269	0.3392	16.396	0.1315	23.5487	0.1795	5.713	0.14	9.9716	0.535	12.7976	0.2853	6.2927
Module: yellow	Os06g0592500	2.6958	19.3001	1.767	23.2111	2.4831	37.7983	2.1324	15.6949	3.9313	24.1949	3.5724	38.0985	4.1846	38.1937	4.3992	60.8659	8.2762	53.74	5.0452	56.1519	5.1708	58.82	2.7641	91.1316	4.8903	1316.69	6.3602	603.765	6.0227	748.4	2.8096	1970.95	5.2438	2977.57	4.8843	1253.2	6.3319	260.83	16.1858	194.421	8.9925	147.04	6.7142	235.289	4.7349	389.789	5.6367	135.721
Module: yellow	Os12g0432600	0.8728	23.4963	1.2504	33.7209	0.2506	24.8181	0.6575	20.2496	0.6546	31.4094	0.5577	19.799	1.0628	114.92	2.4417	146.048	1.9269	87.589	1.1118	96.3488	1.9918	141.084	2.2436	86.9796	0.5389	207.806	1.9942	108.145	2.131	126.013	1.5594	261.555	0.8372	426.526	3.1014	249.237	1.1033	43.7164	2.5961	53.2678	2.3198	35.253	0.8768	24.3681	4.0562	54.1198	0.7183	27.0719
Module: pink	Os04g0470100	38.2894	42.1886	42.0731	42.6221	41.0665	47.8922	40.3303	44.4591	37.8043	37.7269	44.8426	42.8187	68.0762	36.4821	79.4492	37.4158	95.4134	46.4515	52.972	34.5215	65.4749	41.8448	59.1379	40.3909	60.9638	112.544	79.3937	64.1332	94.8891	90.8067	63.9506	115.153	68.9482	169.281	93.7181	105.335	97.326	46.9526	129.49	51.5651	106.895	42.6408	96.7958	43.3583	73.3748	49.7136	84.4618	34.193
Module: pink	Os11g0160100	11.7886	10.3731	15.0769	11.2314	9.1871	9.5004	11.0477	10.3292	9.9815	10.3491	17.0115	10.9921	25.3995	6.2854	21.9631	8.7547	33.8831	12.7903	29.3699	7.5715	21.6654	10.3762	27.736	7.9575	24.9939	32.5806	21.8776	14.3358	31.0318	21.6878	25.2109	33.7456	20.0965	46.9889	28.2537	23.9579	33.4278	11.3276	43.5776	18.7442	31.2326	8.9402	36.3885	9.9141	32.0297	13.2296	30.5099	8.7301
Module: pink	Os08g0546800	4.3177	7.8291	6.317	7.587	3.8874	9.5725	4.5903	8.1874	2.8356	6.4316	5.3213	11.447	7.1976	1.4924	10.4668	1.3494	38.3706	1.3705	9.8566	2.3268	8.6152	1.1464	7.6182	2.1817	9.0232	24.1007	16.5362	12.7541	20.8015	15.6151	14.1386	30.4881	13.4199	40.5475	17.375	17.5237	32.706	10.8701	39.6942	11.2103	35.7843	7.1232	31.4269	11.2079	7.8186	20.7376	30.7237	9.7871
Module: pink	Os01g0884300	85.7197	91.7421	140.825	121.357	83.1357	239.397	82.5403	87.2553	80.4964	116.169	120.482	197.188	415.389	449.136	379.993	470.591	450.664	445.498	365.629	333.433	378.648	440.495	396.261	307.908	146.053	430.541	237.17	231.819	348.399	299.152	206.645	438.63	209.574	645.89	316.795	393.645	444.682	133.846	678.49	130.439	521.668	98.906	454.528	102.091	404.574	193.816	404.112	91.0625
Module: pink	Os12g0507300	22.0773	33.1734	30.7797	33.8127	23.3106	40.0694	23.2849	32.2706	25.3133	28.3367	30.7712	43.0066	42.4337	24.3737	45.5536	37.6026	84.9748	51.173	72.2452	31.4025	54.5286	37.6339	59.2884	31.8556	53.9594	85.3039	63.9256	51.9699	56.9632	62.7	57.0673	78.884	60.8466	114.373	65.403	66.7106	68.6827	30.1752	102.352	43.4849	54.079	25.6137	78.9554	31.1712	57.3361	32.8434	64.8828	24.2359
Module: pink	Os06g0154900	7.9127	11.0539	10.7221	12.6256	8.7669	13.8696	8.382	13.1952	7.9324	11.6753	10.6977	13.1758	14.8746	15.4676	17.5218	17.7659	22.8488	19.6566	17.5801	16.7979	15.5624	17.5847	17.1227	14.4783	12.4442	25.1745	16.7323	16.3693	18.5157	20.9183	15.6559	25.4541	15.4463	31.3557	20.3604	19.8294	24.1215	12.5868	28.3331	14.2552	23.6109	11.3381	23.7375	11.3681	17.9222	14.1936	22.3737	9.7106
Module: pink	Os02g0139000	12.6014	12.8546	23.9137	18.7712	11.7939	32.4373	14.5256	14.1035	14.6898	18.199	21.4469	20.8175	19.8043	6.8589	21.3497	15.4234	76.3528	34.55	25.9931	8.9292	22.4406	12.3718	26.0356	13.4269	35.4498	86.5849	40.7162	47.4561	63.0925	81.9606	37.1823	113.438	36.3184	140.004	51.3478	85.5627	86.1549	23.8765	103.659	18.5049	73.2305	21.1889	95.603	20.7849	25.063	42.1453	74.3067	20.521
Module: pink	Os03g0351300	17.5691	15.4751	43.9217	23.2743	19.0418	32.4253	15.8877	16.7418	15.8814	22.9016	22.9847	21.2541	153.142	104.731	193.925	98.2352	140.25	53.5222	111.669	101.565	169.983	126.74	135.63	81.5104	59.3181	109.591	60.6548	46.0955	91.7717	77.7782	91.9186	146.898	77.5519	210.872	90.262	105.036	100.805	24.2307	146.716	19.6702	96.7807	27.4939	107.234	31.2654	235.176	47.2728	78.2307	34.9186
Module: pink	Os04g0614600	65.328	86.3064	97.3897	79.9042	62.4175	103.512	69.2919	79.1412	69.5258	81.8586	88.3485	89.537	79.7948	58.2451	78.6093	81.7652	313.228	135.087	102.194	60.5535	84.0786	85.4059	109.652	81.1488	201.931	208.896	205.72	151.88	274.309	194.932	198.204	251.681	190.705	397.841	260.243	235.734	258.412	70.4498	366.551	82.8751	274.105	69.1282	289.827	78.7989	109.072	103.386	224.694	85.8411
Module: pink	Os05g0432700	218.237	292.447	229.521	302.325	243.271	268.58	211.484	286.757	240.118	265.339	242.973	268.612	277.122	325.615	338.9	293.381	717.454	320.011	299.649	341.634	300.086	325.101	276.974	304.421	317.678	536.61	435.154	356.096	442.22	428.828	348.695	634.804	464.033	622.634	444.831	580.69	525.642	288.474	663.913	283.04	636.672	307.562	514.049	256.736	270.65	494.18	507.06	289.491
Module: pink	Os08g0500100	34.2461	36.6429	40.0886	39.7035	34.3731	36.6259	32.7362	35.7674	36.0814	38.6238	38.9243	37.1095	32.8001	34.5068	35.5739	44.5604	52.4764	51.8865	37.4519	37.0565	35.4337	40.5864	39.3655	41.074	48.5319	60.7139	46.2501	47.8149	47.0392	50.5759	46.0787	63.5654	41.3825	73.5239	45.8013	52.2431	51.8581	38.5293	58.0841	50.0442	49.964	29.1956	60.9513	30.2623	35.537	38.3627	55.117	30.6415
Module: pink	Os10g0572400	48.3037	55.6	50.2273	53.918	51.5618	49.9677	54.5739	52.7702	52.6071	51.6498	63.1099	55.5694	57.3583	53.7556	57.6892	52.1112	90.2839	54.0252	51.1971	55.2894	47.5674	57.8803	50.1299	51.0056	54.9937	95.8916	67.2743	43.2715	71.9794	63.8676	65.9215	99.4204	73.9054	126.967	79.4673	78.3343	85.9679	53.5512	111.775	54.6655	93.1548	46.1033	92.7981	57.216	50.9643	71.8694	75.3603	46.5718
Module: pink	Os03g0803700	14.1812	16.2386	16.4121	15.651	13.9433	13.0613	13.9026	15.004	13.1809	15.7364	17.2606	14.6309	18.7916	16.3685	21.1473	18.0845	37.7212	18.921	24.2911	17.0979	18.5795	15.2664	23.8745	14.4852	24.0497	33.8426	24.8938	19.3187	33.8802	26.7099	25.7752	28.9655	19.3899	41.1316	34.4272	22.1026	35.5	20.3049	46.8527	26.7791	38.2713	18.107	38.0834	16.3136	23.3829	22.0062	36.6341	16.9065
Module: pink	Os01g0151600	8.6503	7.6871	12.2548	9.7534	10.6589	10.2072	9.1567	8.3838	9.0406	8.5062	8.974	10.3617	56.365	14.9658	73.8956	15.874	35.3653	9.9469	41.4148	15.5283	58.5022	13.0396	48.3026	12.2491	16.5849	34.9214	24.7598	12.83	39.2936	22.7258	19.8501	32.2875	19.2915	39.0568	31.3766	22.5067	30.6995	13.292	44.0736	16.2661	48.6183	18.835	38.9916	15.5324	70.4469	24.3089	28.9778	13.1746
Module: pink	Os08g0425800	16.2425	11.1728	18.3988	11.9654	15.0481	12.0573	16.94	12.6603	14.6981	11.6122	18.3619	12.4146	32.2395	9.7555	38.5333	11.2891	84.7955	8.5706	36.0266	7.9738	31.2418	10.2705	33.6373	9.2364	33.7473	73.754	43.7348	21.4337	66.6678	31.1789	48.2353	75.643	47.3366	113.553	64.8065	39.8164	84.2992	17.5103	109.084	11.0334	79.6872	21.9462	77.515	16.6833	38.3931	32.0785	72.1215	24.1989
Module: pink	Os04g0615100	29.9102	51.8433	41.1543	44.0221	30.5676	45.1176	34.682	48.8678	31.9607	39.6374	43.5331	51.1189	38.1439	45.6685	44.1834	61.4879	113.638	68.5113	36.2306	47.603	38.4644	58.9971	45.1486	44.0463	53.0183	169.683	67.454	73.6325	75.9349	109.602	61.1281	198.355	63.6851	289.725	80.679	136.032	137.073	50.8871	154.045	53.3373	112.137	44.0014	148.647	45.8096	44.9168	64.5394	107.252	42.0266
Module: pink	Os03g0826600	125.823	155.817	139.049	143.711	116.174	163.386	127.886	141.433	131.797	147.181	161.483	156.285	105.822	97.8875	129.282	100.245	233.81	111.857	112.096	100.979	111.191	103.103	136.362	101.591	170.206	231.151	191.014	158.372	194.597	195.073	191.364	216.775	185.165	254.665	198.212	218.094	242.097	144.866	276.162	155.215	188.725	107.206	252.617	126.324	128.133	152.946	219.351	123.318
Module: pink	Os01g0511100	34.9647	24.2042	54.5307	30.0607	28.218	43.147	32.4264	25.7996	26.6141	31.1429	48.6321	46.6364	115.671	34.6666	121.263	47.8605	344.382	65.7744	140.664	38.1816	107.796	51.8734	118.492	43.2328	155.354	192.996	211.072	72.447	320.663	125.846	187.121	266.046	222.209	310.916	303.014	177.659	274.434	25.9877	439.774	31.2262	338.135	32.6429	261.432	41.244	131.849	73.1864	194.979	36.9776
Module: pink	Os07g0272400	6.3185	6.9829	8.5488	7.0862	6.7413	6.1169	7.2817	8.1384	7.4053	7.2679	8.5835	7.1259	6.8165	5.4457	6.789	5.995	12.1105	7.3163	6.7681	6.9144	6.2607	8.3669	7.5867	5.6958	11.457	13.1814	10.468	9.5744	10.7427	9.8694	7.7666	14.5748	9.8759	18.1168	11.3005	11.1858	12.689	8.8692	13.2797	8.7227	9.738	6.1067	12.6099	6.5168	6.774	6.3698	11.1494	9.2791
Module: pink	Os02g0717500	10.4178	21.2146	13.2542	17.0696	8.4502	25.8808	9.9616	18.5942	8.0872	18.3871	14.2527	23.0641	11.6504	18.0383	10.5757	21.1952	50.3751	29.8793	14.1461	19.4621	9.799	21.5622	15.955	19.9257	21.8485	59.4068	27.1018	32.6455	35.0173	52.9461	25.8662	59.2585	26.8804	96.9193	42.8075	65.0222	66.0247	23.3116	76.6611	29.4007	43.6795	17.7441	73.8141	22.4943	13.6301	21.8654	51.6027	17.057
Module: pink	Os05g0110800	53.2688	45.4305	57.9661	41.6486	54.4567	31.0872	51.3569	47.5168	59.7382	34.8989	64.3664	41.0179	42.3026	19.0871	48.2225	19.1502	116.315	24.2796	37.0209	22.083	35.5338	25.7105	41.0642	15.7883	81.0796	97.0929	93.3049	51.4798	103.769	81.5524	76.7916	130.253	92.5859	187.277	105.375	113.348	137.098	21.5235	169.197	23.8688	113.451	15.7532	139.234	24.578	40.5797	36.4138	122.706	18.536
Module: pink	Os08g0107500	21.5373	33.2892	27.3689	32.8455	24.6018	34.2239	24.5368	30.9918	24.5343	34.8646	27.0267	35.2855	38.97	26.0505	39.3352	31.1951	50.7166	29.5978	45.5977	28.6643	37.7629	33.4684	46.4991	29.7154	43.222	68.0011	42.6206	48.1276	51.9531	51.1909	45.3948	73.438	39.2417	81.5891	50.3528	50.9881	50.8095	39.9506	62.1496	42.657	58.0496	37.9471	50.1294	40.323	47.8833	40.7736	50.5129	34.3645
Module: pink	Os02g0670900	73.6238	29.9541	79.9193	41.9442	62.4729	69.7984	59.0998	35.0707	67.7769	42.956	85.3004	71.5228	150.241	88.8062	204.942	136.827	178.483	105.914	174.84	106.067	188.682	189.716	180.567	110.195	158.259	221.784	136.279	125.84	129.15	167.524	182.851	290.566	178.923	409.263	154.925	247.715	167.616	76.4689	243.709	60.3841	113.343	53.2933	156.107	63.331	192.666	111.155	131.919	81.178
Module: pink	Os02g0796700	10.5897	16.9776	12.3523	15.7135	9.8156	12.4043	10.3026	16.9923	10.7774	14.0454	13.8666	12.8648	11.2851	10.0409	12.2577	9.6741	24.7606	11.2967	12.1524	11.4131	12.054	10.7155	11.8741	8.5967	17.8688	35.3853	16.4525	19.4293	19.0139	25.2258	15.2777	37.0556	15.0434	46.0594	18.8379	26.0777	27.0478	17.9865	28.7196	20.3206	25.1719	12.0301	29.9098	13.5027	13.5981	17.1377	24.5028	13.5076
Module: pink	Os03g0767800	133.659	110.326	126.806	131.959	134.305	122.894	142.287	115.144	120.522	118.135	127.21	148.041	237.355	127.945	236.796	152.21	408.237	99.5699	247.915	110.035	232.23	127.45	227.617	119.703	203.805	292.803	265.35	162.001	407.234	217.052	237.787	314.355	253.992	385.824	339.717	270.172	401.009	138.835	435.445	158.039	458.719	142.134	371.318	143.493	233.567	201.668	340.651	158.62
Module: pink	Os02g0517300	26.5046	33.4072	32.4966	32.9249	23.618	27.1303	25.2249	33.1106	26.8337	31.5372	33.0842	26.8988	46.5984	33.7881	59.3398	35.6944	40.9133	33.451	42.336	32.4575	48.478	33.2453	48.1296	28.9321	45.9113	60.1314	44.6385	34.0772	54.1941	41.2292	43.7322	52.7216	38.2609	76.3309	52.2364	44.628	46.2904	34.3266	55.2802	48.6244	47.5831	19.1796	48.2105	23.3478	60.8392	29.0389	42.4858	24.9177
Module: pink	Os07g0486500	22.2017	28.5881	29.5377	26.647	26.8381	32.9977	20.618	26.2001	22.9135	25.9248	27.57	30.9683	26.6635	11.4368	30.6607	15.1576	45.9799	27.1099	27.8159	14.8289	27.2351	13.0759	28.9489	14.0311	36.312	40.5981	43.9793	28.7694	45.6512	39.0088	33.882	43.2933	38.0245	59.9535	43.1947	41.1423	47.7865	26.3884	53.756	28.1937	46.3947	19.1743	47.2516	24.1385	31.0612	22.7446	38.3201	18.9581
Module: pink	Os03g0327800	5.9526	9.9284	21.9262	11.5337	5.8063	22.8954	6.1556	11.5665	5.1277	9.5092	15.4977	19.3996	14.6312	28.7144	15.1135	39.812	85.1804	52.1812	18.9882	24.2096	16.0405	35.4441	37.4329	25.1851	16.481	67.2647	32.2216	19.0155	53.1597	40.0484	24.563	78.8477	29.2752	84.029	50.8799	57.5925	91.7882	5.2991	112.743	1.7037	79.1691	7.532	122.29	5.5654	33.5278	11.2998	95.1235	6.1258
Module: pink	Os04g0583000	0.2356	0.1162	0.9661	0.403	0.3494	0.2097	0.3549	0.1354	0.3105	0.2334	0.6243	0.2264	1.073	0.7673	0.8786	1.4842	3.7927	0.6021	1.5337	0.5417	1.1445	1.434	1.8114	0.582	0.711	3.1496	1.2992	2.0578	1.7705	2.5192	0.9565	3.9754	1.4311	5.9766	1.5501	3.8158	2.8454	0.4674	4.7267	0.8227	2.7415	0.5674	2.6623	0.3894	2.4259	0.4664	2.197	0.5182
Module: pink	Os06g0103300	31.7626	26.4541	46.4866	28.8939	35.5153	34.1485	34.4677	25.8243	33.1728	27.3641	43.9258	29.3667	41.4391	16.8035	41.7069	27.642	95.9867	39.4826	43.789	25.32	38.044	33.0041	48.0495	23.605	70.0776	95.3348	80.0964	49.2883	96.8403	70.8299	68.6601	104.161	74.7677	189.367	89.9945	91.3308	80.5635	25.7771	99.263	26.4329	91.824	26.6828	92.9488	28.5022	45.953	40.3679	71.44	26.6207
Module: pink	Os02g0481700	8.884	6.698	11.1296	6.8054	6.9819	6.402	7.953	6.4675	7.5425	5.4585	10.2368	5.8305	9.5638	7.0732	10.6305	7.2088	19.9433	9.3218	11.1066	7.6927	8.8732	5.8599	13.6902	6.6638	19.0202	21.8787	17.4639	9.2922	23.0189	15.2858	16.95	18.6987	15.3816	29.2239	19.8345	12.4776	21.6742	9.6938	23.246	11.2569	20.0837	7.6253	26.6412	6.9109	15.6868	5.7176	19.1066	6.5844
Module: pink	Os06g0646700	20.3868	18.5379	23.6648	24.114	21.2423	20.7627	18.0258	22.0098	17.8871	19.9569	18.8118	21.4541	50.0794	72.3258	68.52	57.7308	43.9666	48.8982	52.3877	58.2844	61.2868	65.2851	56.091	51.5641	33.0992	53.4824	41.0286	36.3	33.8919	31.3164	31.263	53.5554	41.9136	58.1692	37.0081	42.2007	34.9976	32.1365	40.4274	36.6037	44.5555	23.7542	33.8141	31.7621	62.3465	39.307	33.7774	26.6082
Module: pink	Os01g0805400	3.1138	2.1351	3.3497	3.3526	3.1595	3.8271	3.3163	2.6129	3.2928	3.5442	3.6106	5.3826	7.0839	3.224	8.8728	7.2324	15.3543	7.4808	8.8018	3.6471	9.2814	17.8624	8.0849	5.268	6.362	11.6239	10.4724	3.4737	9.8825	7.867	8.1567	13.1375	10.6009	18.502	11.272	9.3013	11.1357	7.2818	18.0398	23.6771	14.5606	3.5634	10.3852	8.0625	8.1687	12.4383	8.5351	7.2393
Module: pink	Os04g0623300	51.1006	50.0463	73.9066	46.5204	53.4385	52.493	49.8654	50.6366	61.9836	52.2396	71.295	59.5416	238.81	116.872	344.826	123.183	138.685	113.478	243.87	133.244	325.678	129.198	326.004	113.608	99.2063	105.59	107.225	66.8606	115.872	89.9641	116.202	122.166	106.278	138.883	113.613	79.8897	123.415	72.1248	175.195	66.3185	119.61	50.8846	128.364	67.204	399.012	81.5643	118.536	69.3872
Module: pink	Os01g0962100	0.9859	0.2365	1.9388	1.3493	2.862	0.6425	1.7716	0.7614	1.9171	0.7599	0.7985	1.5515	9.7188	2.4103	10.3124	4.8318	35.5704	2.301	13.7487	4.5483	11.1023	6.419	8.1884	3.0066	6.6633	18.4097	19.1732	7.208	27.3873	13.0905	7.8471	32.2309	12.6807	41.1021	26.8055	18.6335	19.5677	3.5681	27.6255	6.5617	25.292	8.4302	29.7245	6.7785	9.5036	19.7975	16.9692	6.2979
Module: pink	Os04g0631800	2.0475	5.5354	5.7462	7.5695	2.0574	9.6405	2.474	5.6716	1.7836	9.1008	4.9196	10.4305	6.7781	16.1747	6.4948	22.5706	18.1533	21.7121	15.1263	16.6243	6.9862	21.2592	13.4644	19.551	9.3928	16.4068	9.5164	14.2181	12.4907	14.7674	11.0296	18.0824	9.1532	20.6206	15.9107	15.0242	17.0043	9.3121	27.4951	8.0916	16.9119	5.6978	17.0025	6.4201	12.6605	6.6449	14.7038	5.6018
Module: pink	Os01g0719100	7.7515	6.8197	8.162	7.544	8.9527	4.0754	9.0061	6.8117	8.9174	5.9363	9.5613	5.4452	36.7678	15.4551	34.3445	15.7228	26.5536	9.8383	32.3581	15.9357	26.0357	15.7925	26.874	7.9243	12.1603	22.9599	16.6068	11.6181	31.8554	13.1383	12.5706	27.5189	13.6572	32.8325	23.1308	10.5514	32.0196	10.5174	33.1313	9.7396	52.2471	9.8332	30.6088	7.5038	30.1402	12.3519	27.967	6.9669
Module: pink	Os05g0405900	34.5953	40.5563	36.3335	35.9873	31.4779	34.5357	32.3148	41.1375	33.9143	37.4224	39.2963	34.3486	26.5748	27.6011	27.1001	27.7403	48.5983	34.603	25.6148	34.061	25.2673	32.5926	29.2671	32.319	44.7358	68.79	42.167	45.4259	47.1699	60.8435	42.8153	70.6441	36.2851	76.2642	47.8395	58.6894	59.8677	54.0365	61.7609	64.4558	47.6096	29.4921	66.9912	34.6113	30.0983	44.1372	49.429	35.5153
Module: pink	Os12g0624300	0.3642	0.2751	0.7519	0.3426	0.183	0.4339	0.3841	0.3663	0.3187	0.2992	0.5128	0.1934	1.0061	0.4006	1.1886	0.7649	6.1114	0.425	2.165	0.1929	1.1573	0.485	3.0526	0.7531	2.3608	3.4861	3.2472	1.48	6.1632	3.4517	2.864	5.4802	3.1733	5.3058	5.0661	4.0847	4.9533	0.6105	9.1475	1.5581	5.8517	1.2989	4.4552	0.6412	2.8923	1.7665	4.2891	0.7477
Module: pink	Os01g0521400	14.3557	17.735	19.767	19.171	16.1054	22.9001	15.4071	20.3235	15.3597	20.2158	17.0905	21.448	34.0972	17.5693	53.6238	17.4547	30.9701	22.827	26.9157	19.0075	34.6312	17.104	28.2709	16.939	27.4832	65.7061	27.3201	32.0187	34.7971	39.2916	30.3488	66.559	24.8487	82.1637	33.8688	38.6395	42.1899	23.6663	51.805	32.4546	47.1478	20.5013	42.7953	22.332	46.8106	28.8066	31.9894	20.503
Module: pink	Os07g0186000	786.009	1009.02	870.767	1022.67	1121.14	1246.26	698.471	883.996	1088.85	893.344	828.135	1087.54	705.866	653.65	1112.28	689.137	3552.59	859.479	818.533	659.085	823.089	569.236	666.066	712.729	1609.81	2283.87	2125.82	1223.51	2361.33	1582.25	1694.37	2388.05	2235.9	2208.91	2327.57	1807.31	2928.58	824.105	4435.45	922.768	3155.99	923.637	2885.9	969.18	736.535	1664.59	2384.67	1008.22
Module: pink	Os06g0147200	2.7765	3.0512	3.9708	4.4042	4.4808	8.5124	2.2185	2.5852	3.3731	3.7782	3.3449	5.8982	9.8815	9.5924	15.1755	12.4052	27.7391	7.8545	9.0032	8.9825	18.0364	9.3083	9.0063	9.5846	6.4643	32.3944	11.0441	21.6877	6.767	28.4656	11.2881	35.2142	11.2995	55.8965	10.9757	27.5018	23.3285	6.1659	27.5292	4.7824	12.8787	6.3291	27.6611	5.8409	10.1775	10.3543	17.1257	6.9963
Module: pink	Os03g0807000	4.5367	5.7814	5.7826	5.6849	4.3206	6.3716	5.1691	5.5981	4.887	5.807	5.7947	6.6765	10.2505	4.7448	13.2764	5.2349	12.5769	5.0601	10.5063	4.8165	13.4824	6.4055	13.5345	4.1511	9.2039	8.294	10.5109	7.9967	9.177	6.6888	9.3842	11.4077	10.9411	15.2594	8.8424	10.9678	11.0351	6.4143	12.9164	7.0823	7.5038	4.8442	10.5706	7.2591	14.6928	6.0297	8.7186	6.0882
Module: pink	Os10g0492900	18.0231	10.1997	45.8972	22.8385	31.8124	20.3434	28.374	18.5017	29.9176	27.9026	27.1062	65.1778	152.484	36.7897	161.627	71.7341	463.855	32.7501	214.394	55.6209	176.982	62.827	143.589	37.4968	120.504	145.935	200.088	60.5104	243.261	84.8437	150.656	194.899	200.576	312.504	213.039	93.0269	259.889	58.9362	332.719	39.5398	248.296	87.3322	343.906	104.653	163.71	250.51	216.95	103.038
Module: pink	Os04g0436400	8.5322	9.2683	8.0373	11.0173	6.9602	6.7598	7.0153	9.6397	7.1592	7.8881	8.7081	8.3805	9.124	9.8543	10.5197	9.4804	13.4481	8.9394	7.8856	9.1242	9.9519	8.9094	9.0799	7.8643	11.0137	14.7345	15.4582	12.144	12.9361	10.7648	11.5005	17.4961	11.8812	20.4698	14.022	14.1123	13.6436	10.7773	13.9859	17.2846	15.8278	8.4185	15.1014	9.2421	9.8997	9.6885	12.5787	7.1698
Module: pink	Os01g0944100	4.5457	0.5028	6.9886	1.491	5.7002	2.107	3.2227	1.3467	4.6858	2.0985	7.7416	3.1258	9.9038	1.8485	17.9534	2.4934	79.1715	5.0269	15.162	2.5943	12.2093	4.2487	11.9026	4.1808	32.1832	112.121	36.5499	37.6305	33.5267	53.6898	46.6444	167.212	42.1049	242.184	38.7081	43.0077	103.057	6.622	131.254	7.8068	48.1753	3.1021	111.843	14.6089	19.0383	20.2844	71.8998	6.0358
Module: pink	Os07g0213500	17.2261	38.3439	22.1019	45.1089	24.2857	45.6667	19.3426	40.3936	16.5682	32.5693	21.9384	48.3513	32.5694	28.7697	29.2983	32.1907	73.2492	39.9738	25.634	37.0445	25.1118	47.9868	30.8253	28.6636	31.4519	145.877	50.9353	60.0808	59.989	88.7339	27.3309	187.252	43.8564	189.762	53.873	108.114	76.3785	30.4003	105.142	25.5805	87.2967	23.8708	67.9405	26.6892	29.291	37.5799	56.1957	18.3566
Module: pink	Os06g0669700	24.5445	37.0976	31.9816	36.1867	29.4835	27.4529	31.7324	36.9511	25.6073	31.984	30.0422	29.929	25.0119	30.6859	34.802	35.7434	61.4642	39.1852	24.688	30.6032	24.4803	30.4006	26.1739	26.0551	33.5915	53.2019	40.534	29.6348	51.5061	39.0244	34.3674	55.2563	38.9143	51.9575	44.7951	41.6071	53.3947	33.5964	58.7392	33.4757	71.527	29.7193	45.2399	30.5756	25.7789	41.9032	43.9657	27.4683
Module: pink	Os05g0138300	185.889	382.797	342.837	435.616	215.389	495.135	186.803	367.108	174.251	407.197	233.26	551.775	1523.49	955.587	1558.88	1080.5	984.888	801.358	1639.34	1061.61	1517.35	1133.09	1381.82	914.385	575.311	945.135	812.872	692.492	1067.69	782.556	665.746	1109.24	715.096	1230.01	964.749	938.884	892.831	323.131	1245.59	351.17	1166.7	494.21	808.574	413.173	1530.85	861.935	706.402	385.272
[truncated: 193 more columns]

## Sheet: Supplementary Data 7
Supplementary Data 7.GO biological process and KEGG pathway enrichment analysis of 404 hub genes from the 10 significant WGCNA modules.
GO_level_1	GO	Description	DiffRatio	BgRatio	P-value	Adjusted P-value	All_index	Count_all
Biological process	GO:0006074	(1->3)-beta-D-glucan metabolic process	3/254 1.18%	29/22849 0.13%	0.00400654	0.3089	Os01g0713200;Os01g0944700;Os01g0944800	3
Biological process	GO:0009738	abscisic acid-activated signaling pathway	11/254 4.33%	398/22849 1.74%	0.00518815	0.3089	Os01g0769700;Os01g0616300;Os01g0616366;Os09g0456200;Os03g0300400;Os06g0639500;Os10g0505900;Os05g0572700;Os03g0268600;Os01g0908700;Os07g0272400	11
Molecular function	GO:0004557	alpha-galactosidase activity	2/279 0.72%	13/23751 0.05%	0.00984656	0.243237	Os07g0209100;Os10g0492900	2
Biological process	GO:0043604	amide biosynthetic process	23/254 9.06%	939/22849 4.11%	0.000351101	0.100436	Os04g0501000;Os01g0686800;Os02g0699600;Os07g0565000;Os05g0528900;Os01g0860300;Os08g0399600;Os05g0541900;Os10g0465800;Os06g0701400;Os01g0896700;Os07g0603900;Os05g0274900;Os07g0180900;Os04g0349500;Os03g0577000;Os02g0175600;Os09g0344500;Os01g0160800;Os05g0373900;Os03g0308800;Os04g0614600;Os02g0517300	23
Cellular component	GO:0031225	anchored component of membrane	9/279 3.23%	331/25020 1.32%	0.0124115	0.228004	Os02g0264800;Os02g0771700;Os12g0454600;Os07g0645000;Os10g0160100;Os07g0112700;Os07g0539100;Os01g0940700;Os06g0681200	9
Cellular component	GO:0046658	anchored component of plasma membrane	7/279 2.51%	205/25020 0.82%	0.00836633	0.173834	Os02g0771700;Os12g0454600;Os10g0160100;Os07g0112700;Os07g0539100;Os01g0940700;Os06g0681200	7
Cellular component	GO:0030121	AP-1 adaptor complex	2/279 0.72%	10/25020 0.04%	0.00525588	0.140407	Os05g0543100;Os02g0805000	2
Cellular component	GO:0030119	AP-type membrane coat adaptor complex	2/279 0.72%	30/25020 0.12%	0.043914	0.304145	Os05g0543100;Os02g0805000	2
Biological process	GO:0009074	aromatic amino acid family catabolic process	3/254 1.18%	34/22849 0.15%	0.00629935	0.3089	Os11g0644800;Os01g0855600;Os06g0103300	3
Biological process	GO:0009072	aromatic amino acid family metabolic process	4/254 1.57%	119/22849 0.52%	0.0439998	0.654208	Os04g0406600;Os11g0644800;Os01g0855600;Os06g0103300	4
Biological process	GO:0019439	aromatic compound catabolic process	8/254 3.15%	350/22849 1.53%	0.0426495	0.651269	Os11g0126800;Os05g0458300;Os07g0566800;Os02g0749700;Os11g0644800;Os01g0855600;Os02g0517300;Os06g0103300	8
Molecular function	GO:0033907	beta-D-fucosidase activity	3/279 1.08%	55/23751 0.23%	0.0268665	0.489994	Os03g0703000;Os09g0491100;Os04g0513400	3
Biological process	GO:0051275	beta-glucan catabolic process	3/254 1.18%	56/22849 0.25%	0.0244246	0.543744	Os01g0713200;Os01g0944700;Os01g0944800	3
Molecular function	GO:0008422	beta-glucosidase activity	11/279 3.94%	135/23751 0.57%	5.96243e-07	0.00011418	Os03g0703000;Os02g0771700;Os10g0160100;Os09g0491100;Os01g0713200;Os07g0539100;Os01g0940700;Os01g0944900;Os01g0944700;Os04g0513400;Os01g0944800	11
Biological process	GO:0005975	carbohydrate metabolic process	31/254 12.2%	1724/22849 7.55%	0.00550797	0.3089	Os08g0374800;Os06g0227250;Os02g0726500;Os03g0703000;Os05g0391200;Os02g0771700;Os12g0554800;Os10g0160100;Os05g0482700;Os09g0491100;Os01g0713200;Os07g0539100;Os01g0940700;Os02g0176900;Os08g0120600;Os06g0521500;Os09g0561500;Os01g0944900;Os01g0944700;Os04g0513400;Os03g0626500;Os01g0944800;Os04g0494100;Os07g0209100;Os04g0604250;Os03g0735000;Os06g0326700;Os02g0514326;Os08g0445700;Os03g0351300;Os10g0492…	31
Cellular component	GO:0005618	cell wall	9/279 3.23%	411/25020 1.64%	0.0419121	0.304145	Os01g0769700;Os02g0741800;Os05g0541900;Os07g0180900;Os01g0963000;Os04g0688100;Os01g0358100;Os06g0521500;Os10g0492900	9
Biological process	GO:0043603	cellular amide metabolic process	24/254 9.45%	1198/22849 5.24%	0.00396057	0.3089	Os04g0501000;Os01g0686800;Os02g0699600;Os07g0565000;Os05g0528900;Os01g0860300;Os08g0399600;Os05g0541900;Os10g0465800;Os06g0701400;Os01g0896700;Os07g0603900;Os05g0274900;Os07g0180900;Os04g0349500;Os03g0577000;Os02g0175600;Os04g0507400;Os09g0344500;Os01g0160800;Os05g0373900;Os03g0308800;Os04g0614600;Os02g0517300	24
Biological process	GO:0006520	cellular amino acid metabolic process	11/254 4.33%	545/22849 2.39%	0.042132	0.651269	Os02g0236000;Os01g0717700;Os10g0380800;Os04g0406600;Os11g0644800;Os01g0225000;Os06g0564500;Os03g0231600;Os01g0855600;Os04g0614600;Os06g0103300	11
Biological process	GO:0022411	cellular component disassembly	4/254 1.57%	117/22849 0.51%	0.0417767	0.651269	Os01g0625200;Os05g0575000;Os05g0373900;Os03g0820500	4
Biological process	GO:0034645	cellular macromolecule biosynthetic process	24/254 9.45%	1408/22849 6.16%	0.0249021	0.543744	Os05g0391200;Os04g0501000;Os01g0686800;Os02g0699600;Os07g0565000;Os05g0528900;Os10g0337500;Os01g0860300;Os08g0399600;Os05g0541900;Os10g0465800;Os06g0701400;Os01g0896700;Os07g0603900;Os05g0274900;Os07g0180900;Os04g0349500;Os03g0577000;Os02g0175600;Os01g0160800;Os05g0373900;Os03g0308800;Os03g0735000;Os02g0517300	24
Biological process	GO:0071215	cellular response to abscisic acid stimulus	12/254 4.72%	429/22849 1.88%	0.0032479	0.3089	Os01g0769700;Os01g0616300;Os01g0616366;Os09g0456200;Os03g0300400;Os12g0635700;Os06g0639500;Os10g0505900;Os05g0572700;Os03g0268600;Os01g0908700;Os07g0272400	12
Biological process	GO:0097306	cellular response to alcohol	12/254 4.72%	429/22849 1.88%	0.0032479	0.3089	Os01g0769700;Os01g0616300;Os01g0616366;Os09g0456200;Os03g0300400;Os12g0635700;Os06g0639500;Os10g0505900;Os05g0572700;Os03g0268600;Os01g0908700;Os07g0272400	12
Biological process	GO:0036294	cellular response to decreased oxygen levels	5/254 1.97%	164/22849 0.72%	0.0366211	0.626998	Os01g0738300;Os02g0514326;Os01g0855600;Os02g0273000;Os06g0592500	5
Biological process	GO:0071456	cellular response to hypoxia	5/254 1.97%	161/22849 0.7%	0.0342391	0.614131	Os01g0738300;Os02g0514326;Os01g0855600;Os02g0273000;Os06g0592500	5
Biological process	GO:0071453	cellular response to oxygen levels	5/254 1.97%	164/22849 0.72%	0.0366211	0.626998	Os01g0738300;Os02g0514326;Os01g0855600;Os02g0273000;Os06g0592500	5
Cellular component	GO:0009543	chloroplast thylakoid lumen	3/279 1.08%	59/25020 0.24%	0.0282024	0.275904	Os08g0463900;Os12g0564400;Os02g0643500	3
Cellular component	GO:0030131	clathrin adaptor complex	2/279 0.72%	22/25020 0.09%	0.0247121	0.275904	Os05g0543100;Os02g0805000	2
Cellular component	GO:0030130	clathrin coat of trans-Golgi network vesicle	2/279 0.72%	21/25020 0.08%	0.0226297	0.275904	Os05g0543100;Os02g0805000	2
Cellular component	GO:0048475	coated membrane	4/279 1.43%	104/25020 0.42%	0.0292318	0.275904	Os05g0543100;Os04g0412900;Os02g0805000;Os01g0838800	4
Cellular component	GO:0030662	coated vesicle membrane	4/279 1.43%	122/25020 0.49%	0.0479444	0.314654	Os05g0543100;Os04g0412900;Os02g0805000;Os01g0838800	4
Cellular component	GO:0030659	cytoplasmic vesicle membrane	9/279 3.23%	391/25020 1.56%	0.0321176	0.275904	Os05g0543100;Os04g0412900;Os02g0805000;Os10g0337500;Os01g0838800;Os04g0570500;Os04g0691900;Os07g0272400;Os02g0796700	9
Cellular component	GO:0022625	cytosolic large ribosomal subunit	6/279 2.15%	125/25020 0.5%	0.00282654	0.0880938	Os02g0699600;Os05g0541900;Os10g0465800;Os01g0896700;Os07g0180900;Os02g0175600	6
Cellular component	GO:0022626	cytosolic ribosome	9/279 3.23%	237/25020 0.95%	0.0014379	0.0586619	Os02g0699600;Os07g0565000;Os05g0541900;Os10g0465800;Os01g0896700;Os07g0180900;Os04g0349500;Os03g0577000;Os02g0175600	9
Cellular component	GO:0005783	endoplasmic reticulum	26/279 9.32%	1582/25020 6.32%	0.0311493	0.275904	Os04g0412900;Os03g0304500;Os04g0376700;Os02g0741800;Os01g0134500;Os02g0699600;Os10g0337500;Os06g0349700;Os10g0165300;Os09g0555100;Os01g0183600;Os01g0389200;Os12g0635700;Os04g0511200;Os02g0643000;Os11g0671100;Os11g0659200;Os05g0151200;Os04g0510900;Os06g0326700;Os01g0748600;Os02g0190800;Os09g0337300;Os04g0470100;Os02g0517300;Os02g0481700	26
Biological process	GO:0018904	ether metabolic process	2/254 0.79%	14/22849 0.06%	0.0102567	0.36219	Os07g0643800;Os04g0513400	2
Biological process	GO:0045337	farnesyl diphosphate biosynthetic process	2/254 0.79%	13/22849 0.06%	0.00885593	0.3574	Os01g0248701;Os07g0580900	2
Biological process	GO:0045338	farnesyl diphosphate metabolic process	2/254 0.79%	14/22849 0.06%	0.0102567	0.36219	Os01g0248701;Os07g0580900	2
Molecular function	GO:0004311	farnesyltranstransferase activity	2/279 0.72%	16/23751 0.07%	0.0148019	0.333479	Os01g0248701;Os07g0580900	2
Molecular function	GO:0015925	galactosidase activity	5/279 1.79%	86/23751 0.36%	0.00346475	0.1327	Os03g0703000;Os09g0491100;Os04g0513400;Os07g0209100;Os10g0492900	5
Molecular function	GO:0004337	geranyltranstransferase activity	2/279 0.72%	17/23751 0.07%	0.0166468	0.354127	Os01g0248701;Os07g0580900	2
Molecular function	GO:0042973	glucan endo-1,3-beta-D-glucosidase activity	9/279 3.23%	77/23751 0.32%	3.00565e-07	0.00011418	Os03g0703000;Os02g0771700;Os10g0160100;Os01g0713200;Os07g0539100;Os01g0940700;Os01g0944900;Os01g0944700;Os01g0944800	9
Molecular function	GO:0015926	glucosidase activity	11/279 3.94%	158/23751 0.67%	2.82319e-06	0.000360427	Os03g0703000;Os02g0771700;Os10g0160100;Os09g0491100;Os01g0713200;Os07g0539100;Os01g0940700;Os01g0944900;Os01g0944700;Os04g0513400;Os01g0944800	11
Cellular component	GO:0030660	Golgi-associated vesicle membrane	3/279 1.08%	70/25020 0.28%	0.0434761	0.304145	Os05g0543100;Os02g0805000;Os01g0838800	3
Molecular function	GO:0020037	heme binding	15/279 5.38%	778/23751 3.28%	0.0423777	0.626527	Os06g0349700;Os10g0165300;Os07g0677100;Os01g0183600;Os07g0677200;Os10g0439800;Os06g0522300;Os01g0963000;Os04g0688100;Os06g0521500;Os02g0503900;Os01g0804200;Os04g0570500;Os05g0151200;Os01g0855600	15
Biological process	GO:0042744	hydrogen peroxide catabolic process	6/254 2.36%	210/22849 0.92%	0.0303579	0.58143	Os07g0677100;Os07g0677200;Os06g0522300;Os01g0963000;Os04g0688100;Os06g0521500	6
Biological process	GO:0042743	hydrogen peroxide metabolic process	8/254 3.15%	281/22849 1.23%	0.0136742	0.454464	Os07g0677100;Os07g0677200;Os06g0522300;Os01g0963000;Os04g0688100;Os12g0608633;Os06g0521500;Os02g0481700	8
Molecular function	GO:0016798	hydrolase activity, acting on glycosyl bonds	19/279 6.81%	677/23751 2.85%	0.000445623	0.0341347	Os03g0703000;Os02g0771700;Os12g0554800;Os10g0160100;Os09g0491100;Os01g0713200;Os07g0539100;Os01g0940700;Os07g0566800;Os01g0944900;Os01g0944700;Os04g0513400;Os01g0160800;Os01g0944800;Os04g0494100;Os07g0209100;Os04g0604250;Os03g0351300;Os10g0492900	19
Molecular function	GO:0004553	hydrolase activity, hydrolyzing O-glycosyl compounds	17/279 6.09%	596/23751 2.51%	0.000739964	0.0472343	Os03g0703000;Os02g0771700;Os12g0554800;Os10g0160100;Os09g0491100;Os01g0713200;Os07g0539100;Os01g0940700;Os01g0944900;Os01g0944700;Os04g0513400;Os01g0944800;Os04g0494100;Os07g0209100;Os04g0604250;Os03g0351300;Os10g0492900	17
Molecular function	GO:0050734	hydroxycinnamoyltransferase activity	5/279 1.79%	90/23751 0.38%	0.0042102	0.146591	Os06g0185500;Os10g0108700;Os12g0459100;Os11g0643100;Os01g0179000	5
Biological process	GO:0016226	iron-sulfur cluster assembly	3/254 1.18%	35/22849 0.15%	0.00683408	0.3089	Os05g0568100;Os03g0775500;Os01g0105800	3
Cellular component	GO:0015934	large ribosomal subunit	7/279 2.51%	151/25020 0.6%	0.0015685	0.0586619	Os02g0699600;Os01g0860300;Os05g0541900;Os10g0465800;Os01g0896700;Os07g0180900;Os02g0175600	7
Biological process	GO:0045324	late endosome to vacuole transport	3/254 1.18%	68/22849 0.3%	0.0401132	0.647541	Os02g0273700;Os06g0639500;Os02g0796700	3
Biological process	GO:0046274	lignin catabolic process	2/254 0.79%	32/22849 0.14%	0.0490717	0.699133	Os05g0458300;Os02g0749700	2
Cellular component	GO:0005811	lipid droplet	5/279 1.79%	59/25020 0.24%	0.00050927	0.0317445	Os04g0511200;Os06g0473800;Os12g0464400;Os04g0510900;Os06g0326700	5
Molecular function	GO:0016615	malate dehydrogenase activity	2/279 0.72%	25/23751 0.11%	0.0345364	0.601247	Os11g0180300;Os01g0743500	2
Biological process	GO:0006108	malate metabolic process	2/254 0.79%	29/22849 0.13%	0.0410435	0.651269	Os11g0180300;Os01g0743500	2
Cellular component	GO:0030117	membrane coat	4/279 1.43%	104/25020 0.42%	0.0292318	0.275904	Os05g0543100;Os04g0412900;Os02g0805000;Os01g0838800	4
Biological process	GO:0031163	metallo-sulfur cluster assembly	3/254 1.18%	35/22849 0.15%	0.00683408	0.3089	Os05g0568100;Os03g0775500;Os01g0105800	3
Cellular component	GO:0005759	mitochondrial matrix	5/279 1.79%	146/25020 0.58%	0.0241092	0.275904	Os08g0399600;Os03g0366000;Os07g0603900;Os02g0236000;Os05g0568100	5
Cellular component	GO:0012511	monolayer-surrounded lipid storage body	2/279 0.72%	16/25020 0.06%	0.013412	0.228004	Os06g0473800;Os04g0510900	2
Biological process	GO:0009788	negative regulation of abscisic acid-activated signaling pathway	4/254 1.57%	98/22849 0.43%	0.0239026	0.543744	Os01g0769700;Os06g0639500;Os05g0572700;Os07g0272400	4
Biological process	GO:0030308	negative regulation of cell growth	2/254 0.79%	14/22849 0.06%	0.0102567	0.36219	Os01g0769700;Os03g0799100	2
Biological process	GO:1905958	negative regulation of cellular response to alcohol	4/254 1.57%	98/22849 0.43%	0.0239026	0.543744	Os01g0769700;Os06g0639500;Os05g0572700;Os07g0272400	4
Biological process	GO:1901420	negative regulation of response to alcohol	4/254 1.57%	98/22849 0.43%	0.0239026	0.543744	Os01g0769700;Os06g0639500;Os05g0572700;Os07g0272400	4
Biological process	GO:0140694	non-membrane-bounded organelle assembly	5/254 1.97%	158/22849 0.69%	0.031956	0.591972	Os08g0561800;Os02g0591800;Os01g0896700;Os08g0107500;Os02g0517300	5
Molecular function	GO:0019206	nucleoside kinase activity	2/279 0.72%	13/23751 0.05%	0.00984656	0.243237	Os10g0573000;Os02g0273000	2
Biological process	GO:1901292	nucleoside phosphate catabolic process	2/254 0.79%	28/22849 0.12%	0.0384893	0.632974	Os11g0126800;Os07g0566800	2
Biological process	GO:0043173	nucleotide salvage	2/254 0.79%	28/22849 0.12%	0.0384893	0.632974	Os10g0573000;Os02g0273000	2
Molecular function	GO:0008171	O-methyltransferase activity	4/279 1.43%	67/23751 0.28%	0.00800228	0.243237	Os05g0515600;Os11g0306400;Os11g0307300;Os09g0344500	4
Biological process	GO:0070925	organelle assembly	6/254 2.36%	216/22849 0.95%	0.0341357	0.614131	Os08g0561800;Os02g0591800;Os01g0896700;Os07g0272400;Os08g0107500;Os02g0517300	6
Biological process	GO:1901566	organonitrogen compound biosynthetic process	34/254 13.39%	1963/22849 8.59%	0.00648252	0.3089	Os04g0501000;Os01g0686800;Os02g0699600;Os07g0565000;Os05g0528900;Os10g0337500;Os01g0860300;Os08g0399600;Os05g0541900;Os10g0465800;Os06g0701400;Os01g0896700;Os07g0603900;Os05g0274900;Os07g0180900;Os04g0349500;Os03g0577000;Os02g0175600;Os06g0626600;Os10g0380800;Os12g0635700;Os04g0406600;Os09g0344500;Os01g0160800;Os01g0225000;Os05g0373900;Os06g0564500;Os03g0308800;Os10g0573000;Os03g0231600;Os02g0273…	34
Biological process	GO:0046434	organophosphate catabolic process	6/254 2.36%	100/22849 0.44%	0.000886938	0.12528	Os11g0126800;Os07g0566800;Os03g0626500;Os02g0514326;Os04g0615100;Os03g0826600	6
Biological process	GO:0019637	organophosphate metabolic process	16/254 6.3%	808/22849 3.54%	0.0190581	0.528166	Os05g0482700;Os11g0126800;Os01g0299300;Os01g0248701;Os04g0507400;Os07g0580900;Os08g0120600;Os07g0566800;Os03g0626500;Os04g0691900;Os10g0573000;Os02g0514326;Os02g0273000;Os04g0615100;Os03g0826600;Os04g0436400	16
Molecular function	GO:0016684	oxidoreductase activity, acting on peroxide as acceptor	8/279 2.87%	252/23751 1.06%	0.0101613	0.243237	Os07g0677100;Os07g0677200;Os06g0522300;Os01g0963000;Os04g0688100;Os06g0521500;Os04g0511200;Os04g0510900	8
Biological process	GO:0043043	peptide biosynthetic process	21/254 8.27%	856/22849 3.75%	0.000622168	0.100436	Os04g0501000;Os01g0686800;Os02g0699600;Os07g0565000;Os05g0528900;Os01g0860300;Os08g0399600;Os05g0541900;Os10g0465800;Os06g0701400;Os01g0896700;Os07g0603900;Os05g0274900;Os07g0180900;Os04g0349500;Os03g0577000;Os02g0175600;Os01g0160800;Os05g0373900;Os03g0308800;Os02g0517300	21
Biological process	GO:0006518	peptide metabolic process	21/254 8.27%	1042/22849 4.56%	0.00645097	0.3089	Os04g0501000;Os01g0686800;Os02g0699600;Os07g0565000;Os05g0528900;Os01g0860300;Os08g0399600;Os05g0541900;Os10g0465800;Os06g0701400;Os01g0896700;Os07g0603900;Os05g0274900;Os07g0180900;Os04g0349500;Os03g0577000;Os02g0175600;Os01g0160800;Os05g0373900;Os03g0308800;Os02g0517300	21
Biological process	GO:0035970	peptidyl-threonine dephosphorylation	3/254 1.18%	67/22849 0.29%	0.0386506	0.632974	Os06g0698300;Os05g0572700;Os03g0268600	3
Biological process	GO:0046271	phenylpropanoid catabolic process	2/254 0.79%	32/22849 0.14%	0.0490717	0.699133	Os05g0458300;Os02g0749700	2
Biological process	GO:0009395	phospholipid catabolic process	3/254 1.18%	30/22849 0.13%	0.00441554	0.3089	Os02g0514326;Os04g0615100;Os03g0826600	3
Biological process	GO:0006644	phospholipid metabolic process	8/254 3.15%	316/22849 1.38%	0.0255516	0.543744	Os01g0299300;Os01g0248701;Os07g0580900;Os03g0626500;Os04g0691900;Os02g0514326;Os04g0615100;Os03g0826600	8
Biological process	GO:0048564	photosystem I assembly	2/254 0.79%	11/22849 0.05%	0.00633662	0.3089	Os08g0463900;Os12g0564400	2
Cellular component	GO:0031978	plastid thylakoid lumen	3/279 1.08%	59/25020 0.24%	0.0282024	0.275904	Os08g0463900;Os12g0564400;Os02g0643500	3
Cellular component	GO:0046930	pore complex	2/279 0.72%	26/25020 0.1%	0.0337726	0.275904	Os01g0276200;Os03g0305600	2
Molecular function	GO:0015288	porin activity	2/279 0.72%	27/23751 0.11%	0.0397958	0.626527	Os01g0276200;Os03g0305600	2
Biological process	GO:1901002	positive regulation of response to salt stress	4/254 1.57%	50/22849 0.22%	0.00229965	0.288734	Os05g0555100;Os03g0322900;Os05g0132700;Os01g0884300	4
Biological process	GO:1902584	positive regulation of response to water deprivation	3/254 1.18%	35/22849 0.15%	0.00683408	0.3089	Os03g0322900;Os05g0132700;Os01g0884300	3
Biological process	GO:0097428	protein maturation by iron-sulfur cluster transfer	2/254 0.79%	13/22849 0.06%	0.00885593	0.3574	Os03g0775500;Os01g0105800	2
Molecular function	GO:0047134	protein-disulfide reductase (NAD(P)) activity	2/279 0.72%	28/23751 0.12%	0.0425318	0.626527	Os01g0794400;Os08g0463900	2
Molecular function	GO:0052692	raffinose alpha-galactosidase activity	2/279 0.72%	13/23751 0.05%	0.00984656	0.243237	Os07g0209100;Os10g0492900	2
Biological process	GO:0072593	reactive oxygen species metabolic process	8/254 3.15%	361/22849 1.58%	0.0494962	0.699133	Os07g0677100;Os07g0677200;Os06g0522300;Os01g0963000;Os04g0688100;Os12g0608633;Os06g0521500;Os02g0481700	8
Biological process	GO:0009787	regulation of abscisic acid-activated signaling pathway	6/254 2.36%	205/22849 0.9%	0.0274278	0.543744	Os01g0769700;Os01g0616300;Os01g0616366;Os06g0639500;Os05g0572700;Os07g0272400	6
Biological process	GO:1905957	regulation of cellular response to alcohol	6/254 2.36%	205/22849 0.9%	0.0274278	0.543744	Os01g0769700;Os01g0616300;Os01g0616366;Os06g0639500;Os05g0572700;Os07g0272400	6
Biological process	GO:1901419	regulation of response to alcohol	6/254 2.36%	205/22849 0.9%	0.0274278	0.543744	Os01g0769700;Os01g0616300;Os01g0616366;Os06g0639500;Os05g0572700;Os07g0272400	6
Biological process	GO:2000070	regulation of response to water deprivation	4/254 1.57%	88/22849 0.39%	0.0168003	0.499589	Os03g0322900;Os05g0132700;Os01g0908700;Os01g0884300	4
Biological process	GO:0045730	respiratory burst	2/254 0.79%	14/22849 0.06%	0.0102567	0.36219	Os01g0686800;Os04g0417400	2
Biological process	GO:0009737	response to abscisic acid	20/254 7.87%	734/22849 3.21%	0.000222662	0.100436	Os01g0769700;Os01g0616300;Os01g0616366;Os09g0456200;Os03g0300400;Os12g0635700;Os03g0184100;Os03g0626500;Os10g0389500;Os06g0639500;Os10g0505900;Os05g0572700;Os11g0454200;Os03g0268600;Os05g0151200;Os01g0702500;Os02g0755400;Os01g0908700;Os06g0592500;Os07g0272400	20
Biological process	GO:0001101	response to acid chemical	15/254 5.91%	666/22849 2.91%	0.00788683	0.342774	Os04g0417400;Os05g0575000;Os10g0505900;Os11g0451700;Os11g0454300;Os11g0454200;Os01g0702500;Os03g0322900;Os10g0498300;Os02g0755400;Os05g0132700;Os11g0127600;Os01g0908700;Os06g0592500;Os01g0884300	15
Biological process	GO:0097305	response to alcohol	20/254 7.87%	755/22849 3.3%	0.00032049	0.100436	Os01g0769700;Os01g0616300;Os01g0616366;Os09g0456200;Os03g0300400;Os12g0635700;Os03g0184100;Os03g0626500;Os10g0389500;Os06g0639500;Os10g0505900;Os05g0572700;Os11g0454200;Os03g0268600;Os05g0151200;Os01g0702500;Os02g0755400;Os01g0908700;Os06g0592500;Os07g0272400	20
Biological process	GO:0009409	response to cold	14/254 5.51%	452/22849 1.98%	0.000575622	0.100436	Os04g0514800;Os11g0306400;Os11g0307300;Os03g0184100;Os06g0473800;Os10g0389500;Os10g0505900;Os11g0454200;Os01g0702500;Os03g0322900;Os05g0132700;Os09g0337300;Os01g0884300;Os07g0186000	14
Biological process	GO:0036293	response to decreased oxygen levels	6/254 2.36%	199/22849 0.87%	0.0241669	0.543744	Os01g0738300;Os02g0514326;Os01g0855600;Os02g0273000;Os06g0592500;Os02g0481700	6
Biological process	GO:0050826	response to freezing	3/254 1.18%	47/22849 0.21%	0.0153618	0.469158	Os06g0473800;Os03g0322900;Os09g0337300	3
Biological process	GO:0001666	response to hypoxia	6/254 2.36%	196/22849 0.86%	0.0226385	0.543744	Os01g0738300;Os02g0514326;Os01g0855600;Os02g0273000;Os06g0592500;Os02g0481700	6
Biological process	GO:0010035	response to inorganic substance	18/254 7.09%	946/22849 4.14%	0.0191636	0.528166	Os05g0147400;Os01g0871200;Os04g0417400;Os05g0575000;Os10g0505900;Os11g0451700;Os11g0454300;Os11g0454200;Os01g0702500;Os03g0322900;Os10g0498300;Os02g0755400;Os05g0132700;Os11g0127600;Os01g0908700;Os06g0592500;Os01g0884300;Os02g0481700	18
Biological process	GO:0009642	response to light intensity	4/254 1.57%	121/22849 0.53%	0.0462882	0.679294	Os11g0306400;Os11g0307300;Os03g0184100;Os10g0389500	4
Biological process	GO:0033993	response to lipid	22/254 8.66%	1269/22849 5.55%	0.0263841	0.543744	Os01g0769700;Os01g0616300;Os01g0616366;Os04g0514800;Os09g0456200;Os06g0626600;Os03g0300400;Os12g0635700;Os03g0184100;Os03g0626500;Os10g0389500;Os06g0639500;Os10g0505900;Os05g0572700;Os11g0454200;Os03g0268600;Os05g0151200;Os01g0702500;Os02g0755400;Os01g0908700;Os06g0592500;Os07g0272400	22
Biological process	GO:0006979	response to oxidative stress	11/254 4.33%	530/22849 2.32%	0.0356188	0.626998	Os07g0677100;Os07g0677200;Os06g0522300;Os01g0963000;Os04g0688100;Os06g0521500;Os05g0575000;Os07g0209100;Os01g0855600;Os02g0481700;Os07g0186000	11
Biological process	GO:0070482	response to oxygen levels	6/254 2.36%	200/22849 0.88%	0.0246914	0.543744	Os01g0738300;Os02g0514326;Os01g0855600;Os02g0273000;Os06g0592500;Os02g0481700	6
Biological process	GO:0010114	response to red light	3/254 1.18%	47/22849 0.21%	0.0153618	0.469158	Os03g0184100;Os10g0389500;Os03g0308800	3
Biological process	GO:0009266	response to temperature stimulus	19/254 7.48%	727/22849 3.18%	0.000532129	0.100436	Os04g0514800;Os03g0366000;Os11g0306400;Os11g0307300;Os03g0184100;Os06g0473800;Os10g0389500;Os10g0505900;Os11g0454200;Os08g0104400;Os06g0553001;Os01g0571300;Os01g0702500;Os03g0322900;Os05g0132700;Os09g0337300;Os06g0592500;Os01g0884300;Os07g0186000	19
Biological process	GO:0009415	response to water	15/254 5.91%	621/22849 2.72%	0.00423267	0.3089	Os04g0417400;Os05g0575000;Os10g0505900;Os11g0451700;Os11g0454300;Os11g0454200;Os01g0702500;Os03g0322900;Os10g0498300;Os02g0755400;Os05g0132700;Os11g0127600;Os01g0908700;Os06g0592500;Os01g0884300	15
Biological process	GO:0009414	response to water deprivation	13/254 5.12%	607/22849 2.66%	0.0188094	0.528166	Os04g0417400;Os05g0575000;Os10g0505900;Os11g0454200;Os01g0702500;Os03g0322900;Os10g0498300;Os02g0755400;Os05g0132700;Os11g0127600;Os01g0908700;Os06g0592500;Os01g0884300	13
Biological process	GO:0000027	ribosomal large subunit assembly	2/254 0.79%	25/22849 0.11%	0.0312158	0.587897	Os02g0591800;Os01g0896700	2
Cellular component	GO:0044391	ribosomal subunit	11/279 3.94%	280/25020 1.12%	0.000330582	0.0317445	Os01g0686800;Os02g0699600;Os07g0565000;Os01g0860300;Os05g0541900;Os10g0465800;Os01g0896700;Os07g0180900;Os04g0349500;Os03g0577000;Os02g0175600	11
Cellular component	GO:0005840	ribosome	15/279 5.38%	480/25020 1.92%	0.000352644	0.0317445	Os04g0501000;Os01g0686800;Os02g0699600;Os07g0565000;Os05g0528900;Os01g0860300;Os05g0541900;Os10g0465800;Os06g0701400;Os01g0896700;Os05g0274900;Os07g0180900;Os04g0349500;Os03g0577000;Os02g0175600	15
Biological process	GO:0042255	ribosome assembly	3/254 1.18%	46/22849 0.2%	0.014498	0.468077	Os02g0591800;Os01g0896700;Os08g0107500	3
Molecular function	GO:0019843	rRNA binding	6/279 2.15%	175/23751 0.74%	0.0175677	0.354127	Os02g0591800;Os04g0501000;Os02g0699600;Os07g0565000;Os05g0528900;Os01g0896700	6
Molecular function	GO:0102483	scopolin beta-glucosidase activity	3/279 1.08%	51/23751 0.21%	0.0220639	0.422524	Os03g0703000;Os09g0491100;Os04g0513400	3
Biological process	GO:0048316	seed development	13/254 5.12%	635/22849 2.78%	0.0259761	0.543744	Os02g0726500;Os01g0195200;Os01g0248701;Os06g0521500;Os06g0473800;Os04g0589800;Os08g0104400;Os06g0324400;Os04g0510900;Os08g0327700;Os05g0404000;Os06g0154900;Os03g0803700	13
Biological process	GO:0090351	seedling development	6/254 2.36%	229/22849 1%	0.0433298	0.652836	Os06g0521500;Os04g0583900;Os05g0572700;Os03g0268600;Os11g0659200;Os02g0755400	6
Molecular function	GO:0003735	structural constituent of ribosome	15/279 5.38%	425/23751 1.79%	0.000166968	0.0159872	Os04g0501000;Os02g0699600;Os06g0300600;Os07g0565000;Os05g0528900;Os01g0860300;Os05g0541900;Os10g0465800;Os06g0701400;Os01g0896700;Os05g0274900;Os07g0180900;Os04g0349500;Os03g0577000;Os02g0175600	15
Molecular function	GO:0005198	structural molecule activity	17/279 6.09%	626/23751 2.64%	0.00126104	0.0689969	Os01g0805900;Os04g0501000;Os02g0699600;Os06g0300600;Os07g0565000;Os05g0528900;Os01g0860300;Os05g0541900;Os10g0465800;Os06g0701400;Os01g0896700;Os05g0274900;Os07g0180900;Os04g0349500;Os03g0577000;Os02g0175600;Os03g0637600	17
Cellular component	GO:0031977	thylakoid lumen	4/279 1.43%	68/25020 0.27%	0.0070476	0.164738	Os08g0463900;Os12g0564400;Os05g0568900;Os02g0643500	4
Molecular function	GO:0008483	transaminase activity	5/279 1.79%	81/23751 0.34%	0.00267249	0.113729	Os02g0236000;Os01g0717700;Os11g0644800;Os03g0231600;Os04g0614600	5
Molecular function	GO:0016769	transferase activity, transferring nitrogenous groups	5/279 1.79%	81/23751 0.34%	0.00267249	0.113729	Os02g0236000;Os01g0717700;Os11g0644800;Os03g0231600;Os04g0614600	5
Cellular component	GO:0012510	trans-Golgi network transport vesicle membrane	2/279 0.72%	29/25020 0.12%	0.0412836	0.304145	Os05g0543100;Os02g0805000	2
Biological process	GO:0006412	translation	21/254 8.27%	833/22849 3.65%	0.000437677	0.100436	Os04g0501000;Os01g0686800;Os02g0699600;Os07g0565000;Os05g0528900;Os01g0860300;Os08g0399600;Os05g0541900;Os10g0465800;Os06g0701400;Os01g0896700;Os07g0603900;Os05g0274900;Os07g0180900;Os04g0349500;Os03g0577000;Os02g0175600;Os01g0160800;Os05g0373900;Os03g0308800;Os02g0517300	21
Biological process	GO:0006414	translational elongation	3/254 1.18%	57/22849 0.25%	0.0255753	0.543744	Os01g0686800;Os08g0399600;Os06g0701400	3
Cellular component	GO:0030658	transport vesicle membrane	3/279 1.08%	74/25020 0.3%	0.0498662	0.314654	Os05g0543100;Os04g0412900;Os02g0805000	3
Biological process	GO:0006572	tyrosine catabolic process	2/254 0.79%	11/22849 0.05%	0.00633662	0.3089	Os11g0644800;Os06g0103300	2
Biological process	GO:0006570	tyrosine metabolic process	2/254 0.79%	16/22849 0.07%	0.0133294	0.454464	Os11g0644800;Os06g0103300	2
Biological process	GO:0007034	vacuolar transport	5/254 1.97%	153/22849 0.67%	0.0283678	0.552682	Os05g0543100;Os02g0805000;Os02g0273700;Os06g0639500;Os02g0796700	5
Biological process	GO:0035459	vesicle cargo loading	2/254 0.79%	20/22849 0.09%	0.0204994	0.543744	Os05g0543100;Os04g0412900	2
Cellular component	GO:0030120	vesicle coat	4/279 1.43%	88/25020 0.35%	0.0169927	0.264803	Os05g0543100;Os04g0412900;Os02g0805000;Os01g0838800	4
Cellular component	GO:0012506	vesicle membrane	9/279 3.23%	395/25020 1.58%	0.0339347	0.275904	Os05g0543100;Os04g0412900;Os02g0805000;Os10g0337500;Os01g0838800;Os04g0570500;Os04g0691900;Os07g0272400;Os02g0796700	9
Molecular function	GO:0022829	wide pore channel activity	2/279 0.72%	27/23751 0.11%	0.0397958	0.626527	Os01g0276200;Os03g0305600	2
Genetic Information Processing	ko03010	Ribosome	14/130 10.77%	423/10761 3.93%	0.000577435	0.0456174	Os04g0501000;Os02g0699600;Os07g0565000;Os05g0528900;Os01g0860300;Os05g0541900;Os10g0465800;Os06g0701400;Os01g0896700;Os05g0274900;Os07g0180900;Os04g0349500;Os03g0577000;Os02g0175600	14
Metabolism	ko01110	Biosynthesis of secondary metabolites	48/130 36.92%	2689/10761 24.99%	0.00158854	0.125494	Os03g0703000;Os01g0134500;Os05g0482700;Os02g0236000;Os04g0319700;Os06g0349700;Os03g0804900;Os10g0165300;Os11g0126800;Os05g0515600;Os07g0201800;Os11g0306400;Os11g0307300;Os09g0491100;Os04g0611700;Os07g0677100;Os04g0229100;Os06g0185500;Os01g0299300;Os10g0477900;Os01g0248701;Os07g0677200;Os04g0179700;Os02g0176900;Os10g0439800;Os06g0522300;Os01g0963000;Os07g0580900;Os08g0120600;Os04g0688100;Os11g0643…	48
Metabolism	ko00940	Phenylpropanoid biosynthesis	10/130 7.69%	339/10761 3.15%	0.00794503	0.627658	Os06g0349700;Os07g0677100;Os04g0229100;Os06g0185500;Os07g0677200;Os06g0522300;Os01g0963000;Os04g0688100;Os11g0643100;Os06g0521500	10
Metabolism	ko00350	Tyrosine metabolism	4/130 3.08%	68/10761 0.63%	0.0091267	0.721009	Os02g0236000;Os10g0380800;Os11g0644800;Os06g0103300	4
Metabolism	ko00950	Isoquinoline alkaloid biosynthesis	3/130 2.31%	37/10761 0.34%	0.00992146	0.783795	Os02g0236000;Os10g0380800;Os11g0644800	3
Metabolism	ko00380	Tryptophan metabolism	6/130 4.62%	162/10761 1.51%	0.0136937	1	Os01g0717700;Os05g0515600;Os11g0306400;Os11g0307300;Os10g0380800;Os09g0344500	6
Metabolism	ko01100	Metabolic pathways	63/130 48.46%	4203/10761 39.06%	0.0177207	1	Os08g0374800;Os06g0227250;Os03g0703000;Os02g0771700;Os12g0554800;Os10g0160100;Os01g0134500;Os05g0482700;Os02g0236000;Os11g0180300;Os01g0717700;Os04g0319700;Os06g0349700;Os03g0804900;Os11g0126800;Os05g0515600;Os07g0201800;Os11g0306400;Os11g0307300;Os09g0491100;Os04g0611700;Os07g0539100;Os07g0677100;Os04g0229100;Os06g0185500;Os01g0299300;Os10g0477900;Os01g0248701;Os07g0677200;Os02g0176900;Os06g0522…	63
Metabolism	ko00500	Starch and sucrose metabolism	9/130 6.92%	357/10761 3.32%	0.0289153	1	Os03g0703000;Os02g0771700;Os10g0160100;Os09g0491100;Os07g0539100;Os04g0513400;Os03g0735000;Os08g0445700;Os03g0351300	9
Metabolism	ko00944	Flavone and flavonol biosynthesis	3/130 2.31%	66/10761 0.61%	0.0454603	1	Os09g0329200;Os03g0804900;Os07g0201800	3

## Sheet: Supplementary Data 8
Supplementary Data 8. Significantly differential hub genes between osnpf7.3 knockout mutant and wild type.
Module	ID	WT-CK-L1_fpkm	WT-CK-T1_fpkm	WT-CK-L2_fpkm	WT-CK-T2_fpkm	WT-CK-L3_fpkm	WT-CK-T3_fpkm	KO-CK-L1_fpkm	KO-CK-T1_fpkm	KO-CK-L2_fpkm	KO-CK-T2_fpkm	KO-CK-L3_fpkm	KO-CK-T3_fpkm	WT-2h-L1_fpkm	WT-2h-T1_fpkm	WT-2h-L2_fpkm	WT-2h-T2_fpkm	WT-2h-L3_fpkm	WT-2h-T3_fpkm	KO-2h-L1_fpkm	KO-2h-T1_fpkm	KO-2h-L2_fpkm	KO-2h-T2_fpkm	KO-2h-L3_fpkm	KO-2h-T3_fpkm	WT-1d-L1_fpkm	WT-1d-T1_fpkm	WT-1d-L2_fpkm	WT-1d-T2_fpkm	WT-1d-L3_fpkm	WT-1d-T3_fpkm	KO-1d-L1_fpkm	KO-1d-T1_fpkm	KO-1d-L2_fpkm	KO-1d-T2_fpkm	KO-1d-L3_fpkm	KO-1d-T3_fpkm	WT-4d-L1_fpkm	WT-4d-T1_fpkm	WT-4d-L2_fpkm	WT-4d-T2_fpkm	WT-4d-L3_fpkm	WT-4d-T3_fpkm	KO-4d-L1_fpkm	KO-4d-T1_fpkm	KO-4d-L2_fpkm	KO-4d-T2_fpkm	KO-4d-L3_fpkm	KO-4d-T3_fpkm
Module: black	Os06g0227250	17.4856	5.0131	11.8576	3.5545	13.4761	4.3312	14.9684	5.7005	13.6119	4.8343	13.0595	4.9046	10.7087	9.5756	6.9988	6.7603	3.4027	3.7639	12.5479	8.1127	10.0429	7.5961	9.7754	8.3483	9.7497	5.489	5.9548	6.7019	4.813	6.2568	8.7245	2.4639	6.0906	1.7525	4.9922	2.9126	6.009	16.1002	2.4575	12.0774	3.7327	13.9593	3.9994	13.63	8.9297	7.3969	4.6942	14.0119
Module: black	Os05g0555100	11.9208	4.8688	6.8309	5.0963	8.3223	5.3941	12.0215	5.5369	8.0977	5.7906	8.2717	4.9537	17.9357	7.6718	22.6667	3.5213	2.8243	3.5422	8.8634	5.5953	18.0456	4.9917	11.2416	5.555	4.7686	5.4308	5.0557	5.6019	3.7793	7.901	6.5826	2.2391	4.3196	1.3389	3.1558	3.3003	3.538	15.4831	2.1526	12.5691	2.8051	19.9975	2.6683	16.322	23.8194	10.9655	3.6286	19.7497
Module: black	Os01g0805900	456.87	130.019	286.894	137.512	310.374	126.711	435.123	145.805	344.173	140.367	306.872	133.672	159.939	182.348	147.899	128.979	63.4248	64.6993	132.714	114.123	148.088	105.752	142.868	199.199	187.932	69.0289	173.602	163.937	109.766	104.184	198.109	37.7378	161.684	19.1693	120.282	57.867	89.2197	194.292	54.4091	185.229	65.3444	266.266	66.1987	309.881	130.486	88.4195	68.2895	277.028
Module: black	Os01g0625200	40.5492	11.5991	32.0768	11.344	27.6039	15.2419	37.1822	13.1813	29.9879	15.375	33.6261	14.0043	55.4046	33.395	78.0553	23.3329	15.0454	13.3535	37.2186	26.2425	64.39	20.0518	45.2566	34.9527	22.6285	19.2773	21.2861	22.0351	18.186	23.5867	23.2743	6.9572	17.7275	4.4972	20.6657	12.6152	19.0785	43.6113	11.1348	43.0722	13.8851	61.4869	14.8703	52.8828	74.416	31.1468	14.3036	43.397
Module: black	Os07g0645000	25.337	10.8656	16.0765	7.3393	17.2559	12.1361	24.3474	9.7004	16.4998	10.237	16.7883	12.559	14.8787	18.7174	12.767	15.1842	4.0607	7.9501	11.2689	11.0919	12.6503	11.0741	11.5346	17.1464	12.5452	8.6235	11.8004	12.9445	10.359	8.8356	15.0442	2.9457	12.4767	1.7813	13.3206	4.5803	7.4183	16.9905	6.4759	15.2793	4.0474	17.7451	5.8404	20.1387	10.1646	8.3337	5.6222	19.1613
Module: blue	Os03g0205700	3.0841	6.3069	2.8302	7.1454	1.7579	9.2426	3.6142	8.8665	1.5494	8.8497	1.8105	7.0688	3.9802	7.4025	3.569	4.5229	1.0136	4.6091	3.431	7.1976	3.5875	5.7643	3.5283	7.4655	2.2864	6.8674	1.6711	6.3662	1.8495	10.8016	1.743	3.0438	0.8824	2.8529	1.7945	3.8946	1.0462	17.1307	0.9656	16.2702	0.8694	22.1751	1.5696	17.2295	4.5782	9.1181	1.4961	20.1629
Module: greenyellow	Os11g0306400	0.0819	43.2111	0.0483	60.6719	0.0823	53.0317	0.3454	39.8456	0.1172	100.882	0.1627	75.0054	0	33.4074	0	45.3455	0	42.0375	0	55.5667	0	104.921	0.0378	142.348	0.0786	132.536	0	722.681	0.4116	403.652	0.3724	301.218	0.1178	105.582	0.2263	687.398	0	122.531	0.4059	102.908	0.1385	266.848	0	137.894	0	265.987	0.0943	445.992
Module: greenyellow	Os06g0302000	0.0299	10.1435	0.0353	35.498	0	22.3537	0.0315	15.4828	0.0856	30.2193	0.1188	37.1801	0	36.0896	0.0308	36.8036	0.028	34.0799	0.0296	61.0913	0	87.4913	0.0276	134.423	0.0574	18.0588	0	446.424	0.1503	162.417	0.102	91.21	0.1721	66.1975	0.0661	317.403	0	48.7531	0	70.8694	0	99.7541	0.0263	71.053	0.0274	67.5594	0.0459	308.914
Module: greenyellow	Os09g0555100	0.9479	5.6729	0.6556	4.7305	0.7226	11.8264	0.8274	2.4032	0.5616	5.5492	0.6822	11.6309	0.5263	7.9241	0.0674	8.6503	0.5817	18.0037	0.6801	3.3651	0.4379	6.1879	0.8446	20.4984	0.3453	16.8963	0.2524	40.3069	0.2958	30.1651	0.5203	10.7019	0.9093	4.0819	0.3614	11.9899	0.3857	12.1183	0.1945	6.7726	0.3041	6.9951	0.2873	6.709	0.2995	9.2413	0.226	20.4359
Module: greenyellow	Os06g0311800	0	0.9574	0	0.8599	0.1981	1.7342	0	0.3785	0	0.5937	0	0.4187	0	0.2957	0	2.9809	0	1.7252	0	0	0	0.3635	0	1.2784	0	4.5076	0	15.5638	0	5.1792	0	0.1663	0	0	0	0.2187	0	0.2124	0	0.8132	0	0.1278	0	0.8925	0	0	0	0.3035
Module: greenyellow	Os12g0459100	0	20.1462	0.0416	39.3882	0.0354	4.6159	0.0744	17.3014	0.0337	41.4137	0	5.8819	0.0334	3.8521	0	9.0232	0	1.1525	0	5.5588	0.0727	10.2759	0	3.1031	0.1016	19.3578	0	63.7258	0.1064	28.7418	0	35.2397	0	12.2158	0	55.0385	0	15.9655	0.035	10.9945	0.0895	14.4559	0	28.6386	0	21.4105	0	39.867
Module: magenta	Os06g0522300	0.2336	11.2451	0.5512	14.2263	0.2739	208.046	0.0411	9.5703	0.1487	16.0767	0.1935	137.298	0.4794	8.5508	0.2408	50.7327	0	183.915	0	4.9484	0.2408	19.5271	0.3234	93.0972	0.1122	28.5734	0.0429	23.2367	0.4306	8.9685	0	3.5482	0.0373	3.2414	0.4304	6.7952	0.0383	15.7771	0.0386	54.0416	0.0988	25.0969	0	16.0412	0.3211	37.8787	0	15.2285
Module: magenta	Os02g0749700	0.0249	4.1966	0.4999	16.475	0.2755	407.204	0.0263	9.5456	0.0238	8.5447	0.9414	223.786	0.1416	6.9696	0.1028	134.717	0.2568	605.789	0.1235	7.2544	0.1028	21.2022	0.069	244.41	0.0718	37.167	0.0825	74.3196	0.3508	18.3008	0.0567	6.8144	0.0478	7.8022	0.8266	6.9675	0.0245	36.3173	0.0741	184.451	0.2108	63.2956	0.0219	18.7704	0.0228	36.7671	0	34.0059
Module: magenta	Os06g0521500	0.4892	13.1597	0.666	18.8102	0.7941	225.544	0.2381	12.9667	0.1796	18.6301	0.6732	137.341	1.8534	53.2466	1.5514	153.177	0.3172	387.932	1.305	59.164	1.5902	113.613	2.2225	217.911	0.3976	65.6415	0.2906	60.2119	0.681	33.9155	0.1711	11.6222	0.2527	8.1457	0.6656	23.6554	0.666	37.9069	0.2985	115.162	0.5728	53.9321	0.4631	45.4914	1.4829	62.834	0.3758	30.5391
Module: red	Os02g0574500	18.1666	8.4443	26.4693	6.7831	16.8846	9.5491	18.8477	9.9513	15.0212	6.6541	25.2723	7.0825	26.8624	7.2911	38.8529	6.0128	61.0944	11.5506	20.9653	7.4201	30.5434	10.8197	27.4024	8.8913	41.2124	18.9123	47.7271	10.8049	71.0301	15.1465	44.7813	24.157	41.1651	28.176	61.2009	24.0643	57.6071	3.5346	78.661	3.9124	60.175	3.2671	63.5912	2.9072	42.5022	3.9921	47.4384	3.1945
Module: red	Os05g0575000	23.6922	24.5483	85.3145	18.2866	13.5222	59.613	32.2846	18.719	15.7403	25.0152	62.4485	46.6057	75.7577	12.0557	51.4752	12.898	634.568	32.5129	66.1039	6.986	30.0829	14.2125	130.741	23.6225	271.041	137.486	327.092	55.8994	639.689	115.153	393.832	205.839	420.914	214.286	613.317	158.671	740.498	27.9167	941.428	19.8093	558.209	25.8116	786.167	18.736	152.675	46.9664	512.383	23.9331
Module: turquoise	Os06g0564500	88.0718	0.8029	89.333	0.8484	79.7765	0.9999	86.1762	1.2245	83.832	1.1317	90.7798	0.7024	49.3223	0.8928	42.0004	1.6145	49.2389	0.9163	42.1774	0.7879	42.2541	1.3717	40.0833	0.8857	73.8265	3.3408	57.8514	3.2632	54.0571	2.737	65.223	0.558	54.1566	0.8258	56.7012	1.1614	61.3195	1.4253	43.4777	1.5914	58.4037	1.6081	66.9205	1.6217	41.7368	1.1684	57.6485	2.9275
Module: yellow	Os12g0583700	2.113	10.6132	5.3511	13.9649	2.434	32.419	2.1743	8.257	1.8694	13.8297	3.7905	24.1957	4.2468	43.1102	4.5682	49.8143	25.3426	50.3978	4.2894	36.5503	4.2493	52.7099	6.896	42.0853	3.3657	188.017	10.4034	86.052	14.7152	114.562	6.563	233.709	9.2451	372.772	16.1242	186.833	26.6035	30.9561	34.5436	23.4355	26.238	24.3308	25.3251	27.8451	4.0617	50.483	19.0805	16.8248
Module: yellow	Os02g0671100	0.8856	7.2643	2.239	19.5209	3.3476	44.5673	1.023	9.9031	1.4894	15.9813	1.4251	30.0558	3.5948	61.3899	7.1717	83.3286	21.9612	81.8368	5.3065	69.677	6.8671	99.3756	4.9033	70.0147	2.754	261.224	7.8614	139.258	12.3375	151.236	4.5071	355.992	9.3044	565.107	10.7694	265.462	17.4148	38.9645	33.4085	72.2203	20.3639	16.5177	21.6863	39.0135	5.5263	66.9064	14.5114	18.8322
Module: yellow	Os03g0258200	1.3921	13.2363	5.1677	16.6924	3.0023	16.1674	0.9311	14.009	1.4908	14.3171	2.3622	16.5531	89.6893	131.491	163.423	108.55	37.7478	68.107	88.0034	104.127	152.813	100.126	87.2579	88.2697	4.3694	164.815	20.1116	70.4097	27.6832	91.2124	8.5701	202.728	12.9303	338.689	21.5453	151.156	20.8979	39.4699	52.55	57.1498	43.8165	18.0105	19.4896	34.8948	128.937	51.8913	19.6114	17.5672
Module: yellow	Os02g0455400	5.0566	4.1965	4.9814	4.5349	4.2917	13.8749	3.3656	5.1717	4.8267	3.9252	4.733	8.7603	7.3467	5.3025	8.8042	9.218	24.7381	12.3168	10.5552	7.113	9.0568	9.8367	8.2904	9.9668	10.1368	236.744	17.3287	111.155	14.9549	160.581	11.8334	305.722	18.2724	478.11	14.9794	220.666	21.2869	54.3192	24.7274	49.4184	16.6484	37.8847	15.6222	44.1575	7.603	72.3364	15.0079	31.9777
Module: yellow	Os01g0800300	9.7139	22.9831	11.2738	26.5219	8.3254	26.0778	8.0354	18.7064	7.3027	23.8515	10.6958	25.4571	30.067	37.5639	38.6405	30.9232	20.1589	30.3017	33.3714	42.0408	36.3813	33.9105	36.4709	32.2957	12.7741	99.4677	15.9324	63.7668	23.4893	65.6744	14.0042	128.417	16.2614	155.081	22.9517	94.7028	21.5989	57.2478	25.0542	72.1757	27.6515	45.3302	22.687	38.9495	40.727	63.4043	18.3117	31.7741
Module: yellow	Os05g0519300	0.2397	2.2253	0.7543	4.7572	1.2848	4.6138	0.6743	1.8415	0.8391	3.4135	0.3971	3.0133	1.3624	12.2758	4.8595	11.279	1.9461	6.8541	1.7419	10.1567	3.2533	11.1987	2.2123	6.6699	0.7675	20.144	1.0578	12.2481	1.2051	12.7706	1.6355	28.1195	1.3799	39.0531	1.3252	20.3889	2.1215	0.8038	2.2978	1.1722	2.1964	2.7984	2.0021	3.1357	3.2588	2.658	1.2583	0.6153
Module: yellow	Os01g0175100	16.4507	38.684	32.6246	47.2412	27.0227	83.8473	21.1035	33.9278	23.0532	30.7966	24.0037	47.0913	277.037	90.0323	238.036	77.0425	39.7771	58.407	177.964	104.912	217.584	106.417	185.828	94.0231	16.7514	232.052	24.0017	144.817	23.4594	146.806	18.3063	284.029	30.3865	396.202	21.2821	262.47	31.3745	53.8164	28.5732	65.6753	43.7591	44.1852	30.4605	48.0693	176.948	86.7316	31.6343	31.6204
Module: yellow	Os11g0210201	5.4659	32.2106	43.5309	61.9915	10.8931	44.9816	6.9178	32.7891	4.5218	79.9215	14.7584	67.1524	93.7041	102.769	67.3211	136.613	30.7171	154.886	79.2489	113.814	67.8815	150.058	104.073	160.802	20.735	260.834	26.428	165.645	36.7262	160.269	21.3371	372.517	21.4103	470.068	34.7453	225.42	22.3031	51.4455	34.0524	43.5963	42.6805	49.5055	14.6547	37.533	104.102	71.5084	21.7615	38.1565
Module: yellow	Os06g0662200	4.4924	18.5019	5.6818	18.3111	3.41	41.0869	4.8063	13.0515	5.4297	14.0179	5.3966	22.76	5.2346	11.132	8.6942	13.7256	1.3017	17.1979	5.8921	15.7325	7.428	16.7658	4.6824	15.128	2.4521	103.401	2.7094	76.5552	2.242	79.2411	2.3151	138.597	3.8445	215.256	2.6083	118.551	1.4618	22.7566	1.6984	20.2079	1.9953	14.4197	1.6194	25.9977	5.9531	17.4148	1.7626	9.1077
Module: yellow	Os01g0855600	0	2.1144	0.1959	2.9821	0.1946	5.0817	0.0292	2.0648	0.0264	1.9093	0	3.3799	0.6552	9.431	0.5133	10.1123	0.3888	7.3297	0.0822	6.5413	0.5704	9.9322	0.4085	7.3654	0	10.124	0.1831	5.7189	0.3338	5.4577	0.0315	13.4958	0.2389	19.0281	0.2753	10.027	1.0338	3.0616	0.6036	2.7397	0.7254	1.0407	0.8513	0.7934	0.5071	4.4177	0.6589	2.0453
Module: yellow	Os04g0151700	0.5749	11.7652	1.628	11.4479	1.8487	15.5536	1.334	13.3751	2.0854	8.9418	2.4	10.7478	3.9207	17.6636	4.622	20.7213	1.8309	39.0464	2.2786	22.3599	3.7923	19.506	2.6527	14.1364	1.6565	64.0849	2.4099	44.5933	0.8092	39.234	1.8303	88.6839	1.434	136.893	2.9238	60.5455	0.2261	7.4354	0.228	2.9517	2.2366	8.2023	1.5162	7.8091	3.1612	7.2667	1.0599	4.9578
Module: yellow	Os01g0667900	14.9506	37.7657	41.4094	57.1356	23.4399	77.8339	14.594	38.7461	15.3843	53.712	12.9097	68.9821	126.791	312.274	150.813	280.202	29.198	208.055	101.696	246.482	182.17	307.15	116.193	226.988	20.9265	207.846	31.1698	114.868	33.9523	127.847	24.3527	232.987	28.175	291.042	34.6974	219.168	22.154	48.2995	40.6861	45.4939	30.6672	29.0856	22.0437	33.2045	135.112	51.2259	22.8449	31.1861
Module: yellow	Os03g0776400	0.4273	4.5662	1.2605	5.7751	0.2147	8.3025	0.601	5.471	0.3059	6.3577	0.4955	6.8464	0.7758	3.4618	1.2112	3.9492	0.8672	2.618	0.2117	6.1102	0.734	4.7716	0.2629	4.1371	0.8892	24.6198	0.6285	18.0284	0.7519	17.1754	0.6478	29.8097	0.7174	46.0133	1.496	29.2856	1.0154	5.4755	1.024	4.3749	1.4155	3.464	0.9391	3.9233	0.5874	8.8836	0.6838	1.8645
Module: yellow	Os10g0490900	0.4597	7.6742	1.0245	16.567	1.5911	8.2574	0.5387	10.3697	0.7314	14.2663	1.5738	12.1532	1.2095	6.9884	1.2635	12.9384	8.8987	12.5173	0.6073	9.1538	2.1058	21.2859	0.8013	9.1028	1.4717	95.8355	3.775	28.5873	2.8758	57.0663	1.7423	140.255	5.488	185.155	3.9529	96.1753	10.6975	17.0287	11.2941	13.9551	6.4364	15.7672	4.4453	16.4969	0.6553	37.8019	5.4536	14.3943
Module: yellow	Os09g0337300	2.5681	4.0683	2.2287	6.0995	3.2203	5.3449	2.4175	4.1456	2.2893	4.1145	2.0673	4.8468	2.9751	5.9348	3.9594	5.4027	4.9697	5.7459	3.5328	5.9884	3.5655	9.027	2.8007	4.9313	3.1594	18.5556	3.8863	10.8431	3.35	12.589	3.6438	22.8164	5.2324	38.06	3.496	21.974	2.5668	5.6116	3.8089	7.355	2.9077	4.2391	3.3769	6.278	2.9758	8.9653	2.1519	3.8238
Module: yellow	Os12g0186600	0.5307	1.3747	0.3131	2.1244	0.4	2.1302	0.3638	0.9609	0.3293	1.2207	0.2901	0.6201	0.754	7.7703	0.8205	8.3264	0.1491	8.0818	1.3934	8.9709	1.4221	9.329	0.5142	5.6566	0.5352	54.3574	0.5561	23.9091	0.2935	35.0318	0.5732	79.4886	1.7818	97.2462	1.2321	45.5269	0.3392	16.396	0.1315	23.5487	0.1795	5.713	0.14	9.9716	0.535	12.7976	0.2853	6.2927
Module: yellow	Os06g0592500	2.6958	19.3001	1.767	23.2111	2.4831	37.7983	2.1324	15.6949	3.9313	24.1949	3.5724	38.0985	4.1846	38.1937	4.3992	60.8659	8.2762	53.74	5.0452	56.1519	5.1708	58.82	2.7641	91.1316	4.8903	1316.69	6.3602	603.765	6.0227	748.4	2.8096	1970.95	5.2438	2977.57	4.8843	1253.2	6.3319	260.83	16.1858	194.421	8.9925	147.04	6.7142	235.289	4.7349	389.789	5.6367	135.721
Module: yellow	Os12g0432600	0.8728	23.4963	1.2504	33.7209	0.2506	24.8181	0.6575	20.2496	0.6546	31.4094	0.5577	19.799	1.0628	114.92	2.4417	146.048	1.9269	87.589	1.1118	96.3488	1.9918	141.084	2.2436	86.9796	0.5389	207.806	1.9942	108.145	2.131	126.013	1.5594	261.555	0.8372	426.526	3.1014	249.237	1.1033	43.7164	2.5961	53.2678	2.3198	35.253	0.8768	24.3681	4.0562	54.1198	0.7183	27.0719
Module: pink	Os03g0351300	17.5691	15.4751	43.9217	23.2743	19.0418	32.4253	15.8877	16.7418	15.8814	22.9016	22.9847	21.2541	153.142	104.731	193.925	98.2352	140.25	53.5222	111.669	101.565	169.983	126.74	135.63	81.5104	59.3181	109.591	60.6548	46.0955	91.7717	77.7782	91.9186	146.898	77.5519	210.872	90.262	105.036	100.805	24.2307	146.716	19.6702	96.7807	27.4939	107.234	31.2654	235.176	47.2728	78.2307	34.9186
Module: pink	Os05g0110800	53.2688	45.4305	57.9661	41.6486	54.4567	31.0872	51.3569	47.5168	59.7382	34.8989	64.3664	41.0179	42.3026	19.0871	48.2225	19.1502	116.315	24.2796	37.0209	22.083	35.5338	25.7105	41.0642	15.7883	81.0796	97.0929	93.3049	51.4798	103.769	81.5524	76.7916	130.253	92.5859	187.277	105.375	113.348	137.098	21.5235	169.197	23.8688	113.451	15.7532	139.234	24.578	40.5797	36.4138	122.706	18.536
Module: pink	Os02g0670900	73.6238	29.9541	79.9193	41.9442	62.4729	69.7984	59.0998	35.0707	67.7769	42.956	85.3004	71.5228	150.241	88.8062	204.942	136.827	178.483	105.914	174.84	106.067	188.682	189.716	180.567	110.195	158.259	221.784	136.279	125.84	129.15	167.524	182.851	290.566	178.923	409.263	154.925	247.715	167.616	76.4689	243.709	60.3841	113.343	53.2933	156.107	63.331	192.666	111.155	131.919	81.178
Module: pink	Os04g0583000	0.2356	0.1162	0.9661	0.403	0.3494	0.2097	0.3549	0.1354	0.3105	0.2334	0.6243	0.2264	1.073	0.7673	0.8786	1.4842	3.7927	0.6021	1.5337	0.5417	1.1445	1.434	1.8114	0.582	0.711	3.1496	1.2992	2.0578	1.7705	2.5192	0.9565	3.9754	1.4311	5.9766	1.5501	3.8158	2.8454	0.4674	4.7267	0.8227	2.7415	0.5674	2.6623	0.3894	2.4259	0.4664	2.197	0.5182
Module: pink	Os01g0962100	0.9859	0.2365	1.9388	1.3493	2.862	0.6425	1.7716	0.7614	1.9171	0.7599	0.7985	1.5515	9.7188	2.4103	10.3124	4.8318	35.5704	2.301	13.7487	4.5483	11.1023	6.419	8.1884	3.0066	6.6633	18.4097	19.1732	7.208	27.3873	13.0905	7.8471	32.2309	12.6807	41.1021	26.8055	18.6335	19.5677	3.5681	27.6255	6.5617	25.292	8.4302	29.7245	6.7785	9.5036	19.7975	16.9692	6.2979
Module: pink	Os03g0807000	4.5367	5.7814	5.7826	5.6849	4.3206	6.3716	5.1691	5.5981	4.887	5.807	5.7947	6.6765	10.2505	4.7448	13.2764	5.2349	12.5769	5.0601	10.5063	4.8165	13.4824	6.4055	13.5345	4.1511	9.2039	8.294	10.5109	7.9967	9.177	6.6888	9.3842	11.4077	10.9411	15.2594	8.8424	10.9678	11.0351	6.4143	12.9164	7.0823	7.5038	4.8442	10.5706	7.2591	14.6928	6.0297	8.7186	6.0882
[truncated: 182 more columns]

## Sheet: Supplementary Data 9
Supplementary Data 9. Primers used in this study.
Purpose	Primer name	Forward sequence (5’-3’)	Reverse sequence (5’-3’)
qRT-PCR	UBQ	GCTCCGTGGCGGTATCAT	CGGCAGTTGACAGCCCTAG
	OsNPF7.3	ACCTGTTCTCCCTCGCGTGGAG	TGAGGCTTTCGTCCTGGAACC
	LOC_Os04g50970	GCAGTAGCTAGCTCCAAGGG	GGAGGCTTCTCAACGTCCTC
	LOC_Os04g51009	TGGTGGAGATGCATTGGCTT	TAACGGAAGCTGCACAACCA
Transformation vector	OsNPF7.3-OE	TTCTGCAGAAGCTTGGTACCATGGACGCCGGCGAAATCAT	ATTCGAGCTGGTCAGAGCTCCTTGTCATCGTCATCCTTGT
	OsNPF7.3-OE-identify	TTGGCGACCTCGTATTGGGAA	CAAAGATCGTTATGTTTATCGGCACT
	OsNPF7.3-KO-target	GTTCGCAGATTCGCAGCCCG
	OsNPF7.3-KO-identify	AGGCCTTATTTCGTTGCAAACT	TGGCAATGCCGTTAAATGCT
	proOsNPF7.3-GUS	ACCGCCTGCAGGTCTATAGACAGATCTAGTTCAAACCGGACCCATAC	GATCTACCATGGTCAAGTTGTGCCGCCGCCGGAGTATC
	proOsNPF7.3-GUS-identify	GTCGTGCTCCACCATGTTG	TTACATCCGGTACAAACGCG
	Zm00001d026221-target	GGGGGCTCCAAAGATTCAGG	AGCACGGCGTTCAATGGCAT
	Zm00001d026221-identify	GGCCGGTAGCTTCTTTTAAC	AGAAGGTAGACGAGGAGCGA
	OsNPF7.3-GFP-LC	GGCAGCGGCCGAATTC ATGGACGCCGGCGAAATCAT	GTCGACTGCAGAATTC CGACACGACCAGCTTCACCC
Promoter activity assay	proOsNPF7.3-S1-LZ004	CGGTATCGATAAGCTT CAGATCTAGTTAAAACCGGA	TGTAAAAATAAAGCTT TCAATACTATAGTGAACTTG
	proOsNPF7.3-S2-LZ004	CGGTATCGATAAGCTT TTGAGATTTAGGGTTATCTC	TGTAAAAATAAAGCTT ATCACGCGATGAGATTCTCA
	proOsNPF7.3-S3-LZ004	CGGTATCGATAAGCTT TCGCGAACTAACTTGAGCGC	TGTAAAAATAAAGCTT CATTGCCGCCGCCGGAGTAT
	proOsNPF7.3-R1-LZ004	CGGTATCGATAAGCTT CAGATCTAGTTCAAACCGGA	TGTAAAAATAAAGCTT TCAATACTATAGTGAACTTG
	proOsNPF7.3-R2-LZ004	CGGTATCGATAAGCTT TTGAGATTTAGGGTTATCTC	TGTAAAAATAAAGCTT ATCACGCGATGAGATTCTCA
	proOsNPF7.3-R3-LZ004	CGGTATCGATAAGCTT TCGCGAACTAACTTAAATAT	TGTAAAAATAAAGCTT CATTGCCGCCGCCGGAGTAT
	DOF11-LC	GCCGCTGCGGCAGCGGCCGAATTCATGATGGCAGGAGCTCCCCC	TAGAGTCGCGGCCCCGGTGGATCCGATGGCAGCGGAGGAGCCAT
EMSA	hap1-4-cy5	GTGTTCTTAGCGATTTAAAAATAAAGGTTGAAA	TTTCAACCTTTATTTTTAAATCGCTAAGAACAC
	hap2-4-cy5	TAGTGATTTAAAATTTAAAAGTAAATGTTGAAA	TTTCAACATTTACTTTTAAATTTTAAATCACTA
	HIS-DOF11	GAGAACAGATTGGTGGATCC ATGATGGCAGGAGCTCCCCC	TCGAGTGCGGCCGCAAGCTT GATGGCAGCGGAGGAGCCAT
Y1H	DOF11-B42AD	GCCAGATTATGCCTCTCCCGAATTC ATGATGGCAGGAGCTCCCCC	GCGAAGAAGTCCAAAGCTTCTCGAG GATGGCAGCGGAGGAGCCAT
	proOsNPF7.3-S2/R2-LacZ	GAATTCGAGCTCGGTACC ACGGCTTATTTGTAAATAAA	TCGACAGATCCCCGGGTACC TTATACTTATCGGCTAAAAT
Xenopus laevis oocytes	pGEMHE-NPF7.3	ATTCCCCGGGGATCCGAATTC ATGGACGCCGGCGAAA	CAAGCTTGCTCTAGAGAATTCTCACGACACGACCAGC
