# Supplementary material for: Natural variation of OsNPF7.3 regulates alkaline tolerance by modulating ammonium uptake and redistribution in rice
Source: Research Square preprint supplement (doi:10.21203/rs.3.rs-8236504/v1), 2025-12-04
Supplement: Supplementary file 2 [file 96468e2b6e7da4b0bcbd3c18.docx]

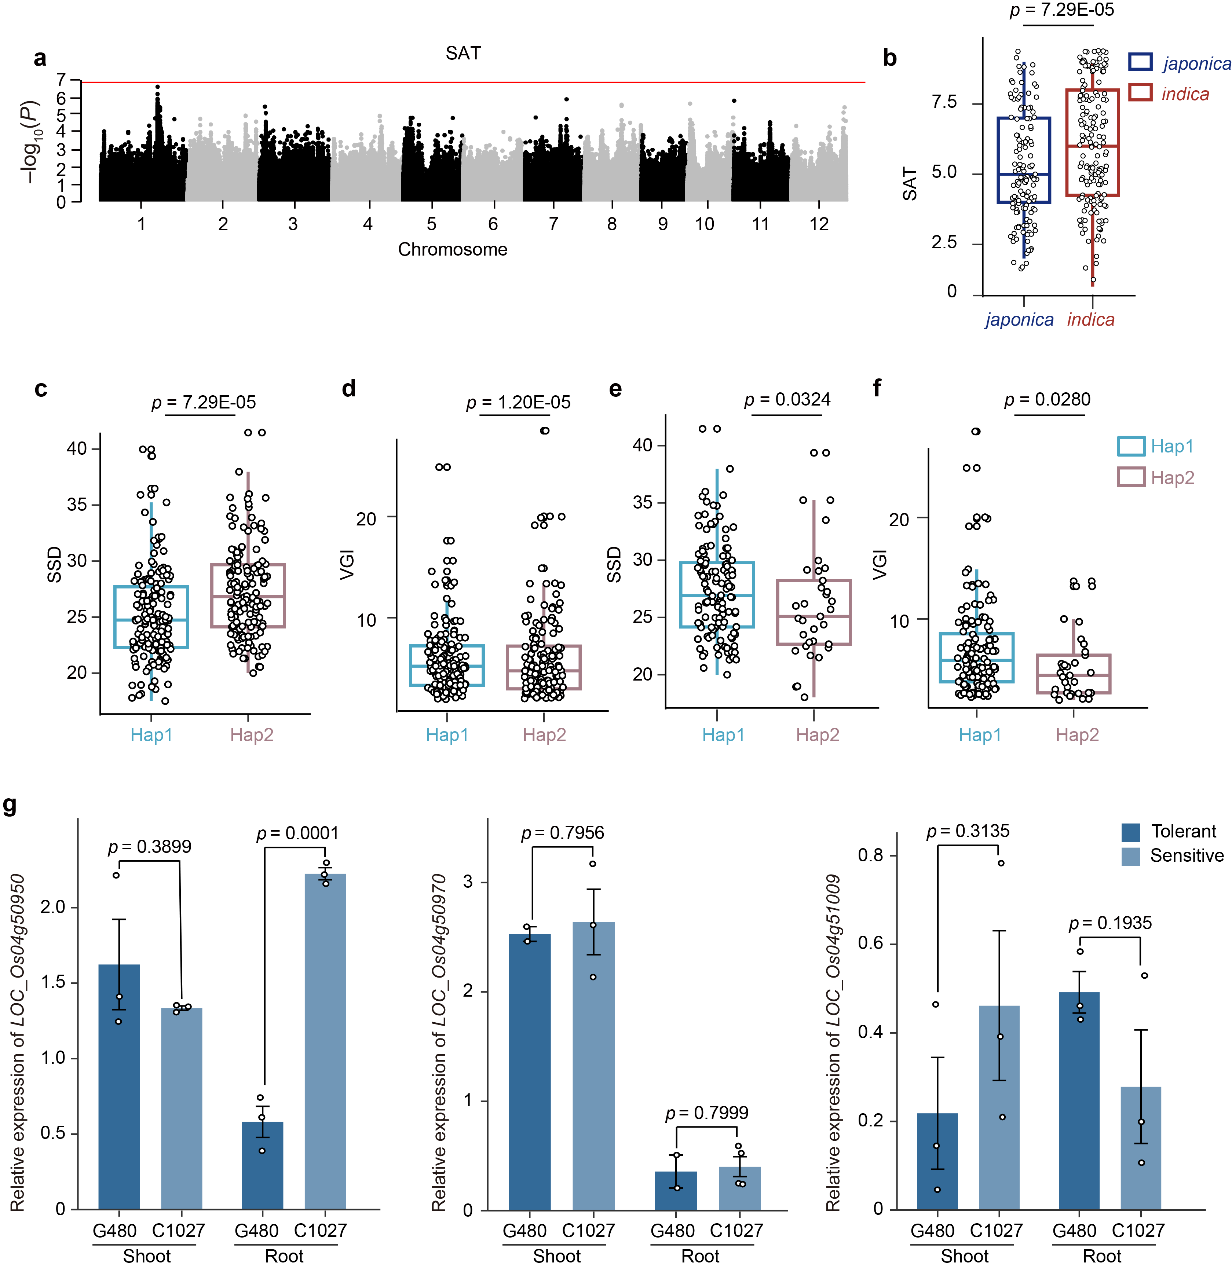


**Supplementary Fig. 1 GWAS results of SAT and expression and haplotype analysis of candidate genes. a** Manhattan plot for GWAS results of SAT in the whole population. **b** SAT distribution between *indica* and *japonica* subpopulations. **c**, **d** phenotypic distribution of SSD (**c**) and VGI (**d**) between two haplotypes of *LOC_Os04g50970*. **e**, **f** phenotypic distribution of SSD (**e**) and VGI (**f**) between two haplotypes of *LOC_Os04g51009*. **g** Differential expression analysis of three candidate genes between alkaline-tolerant and sensitive accessions after alkaline stress for 7 d. Statistical significance was calculated by two-tailed Student’s *t*-tests.


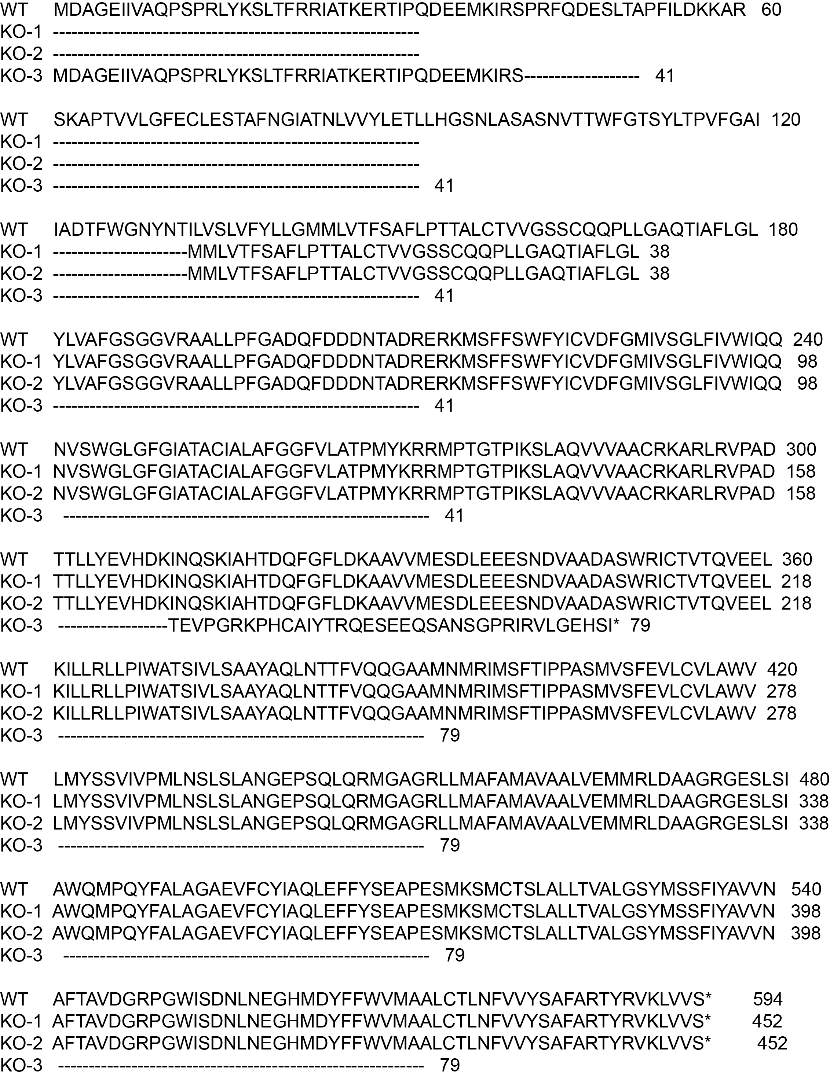


**Supplementary Fig. 2** **Protein sequences of *OsNPF7.3* knockout mutants.**
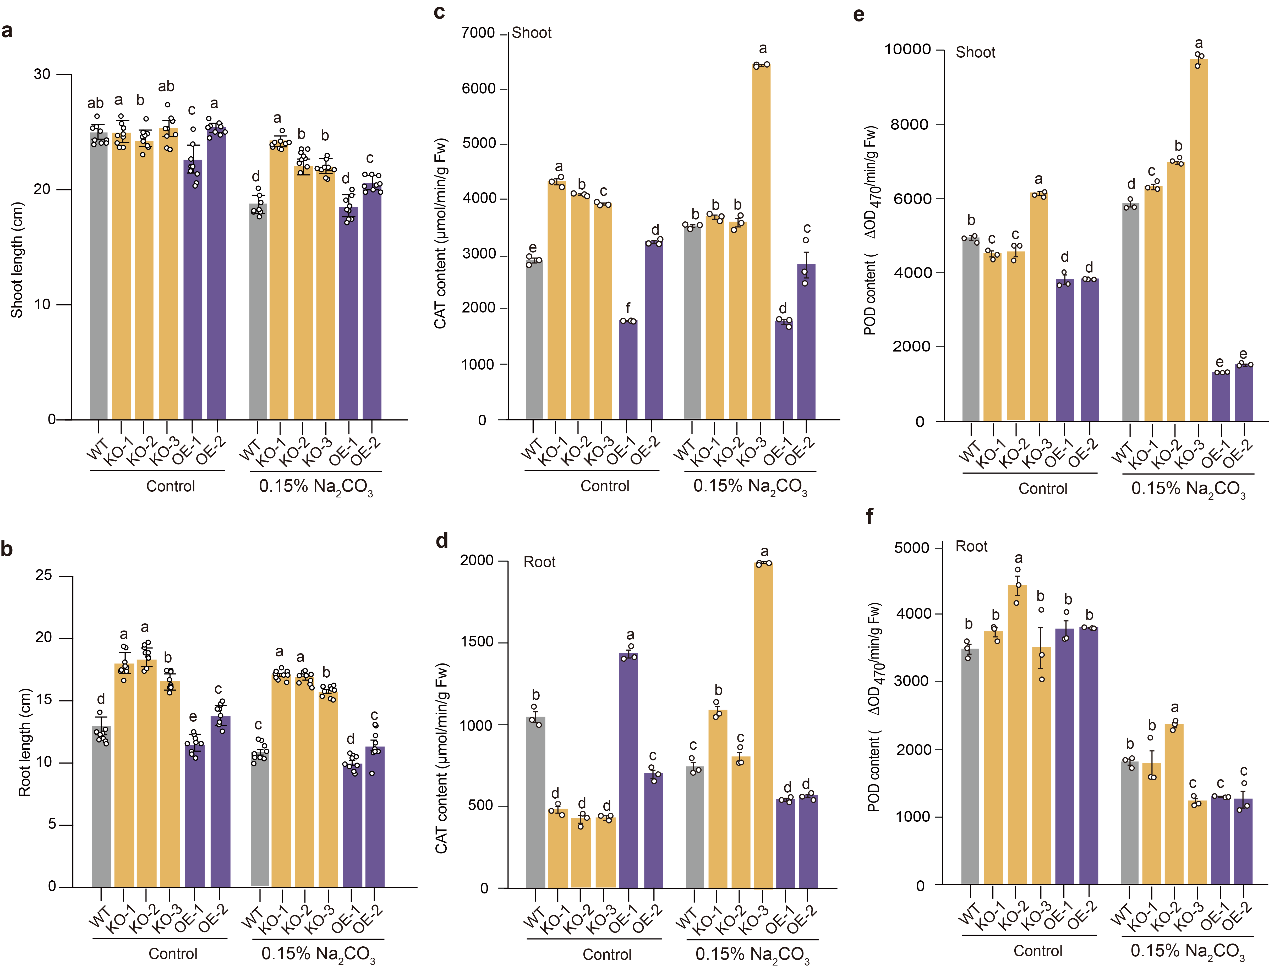


**Supplementary Fig. 3 Comparison of morphological and physiological traits among the *OsNPF7.3* transgenic lines under control and alkaline stress conditions. a** Shoot lengt. **b** root length. **c** CAT content in shoots. **d** CAT content in roots. **e** POD content in shoots. **f** POD content in roots. Data represent mean ± s.d. (*n* = 3). Different letters represent significant differences at *p* < 0.05 based on Duncan’s multiple range test.


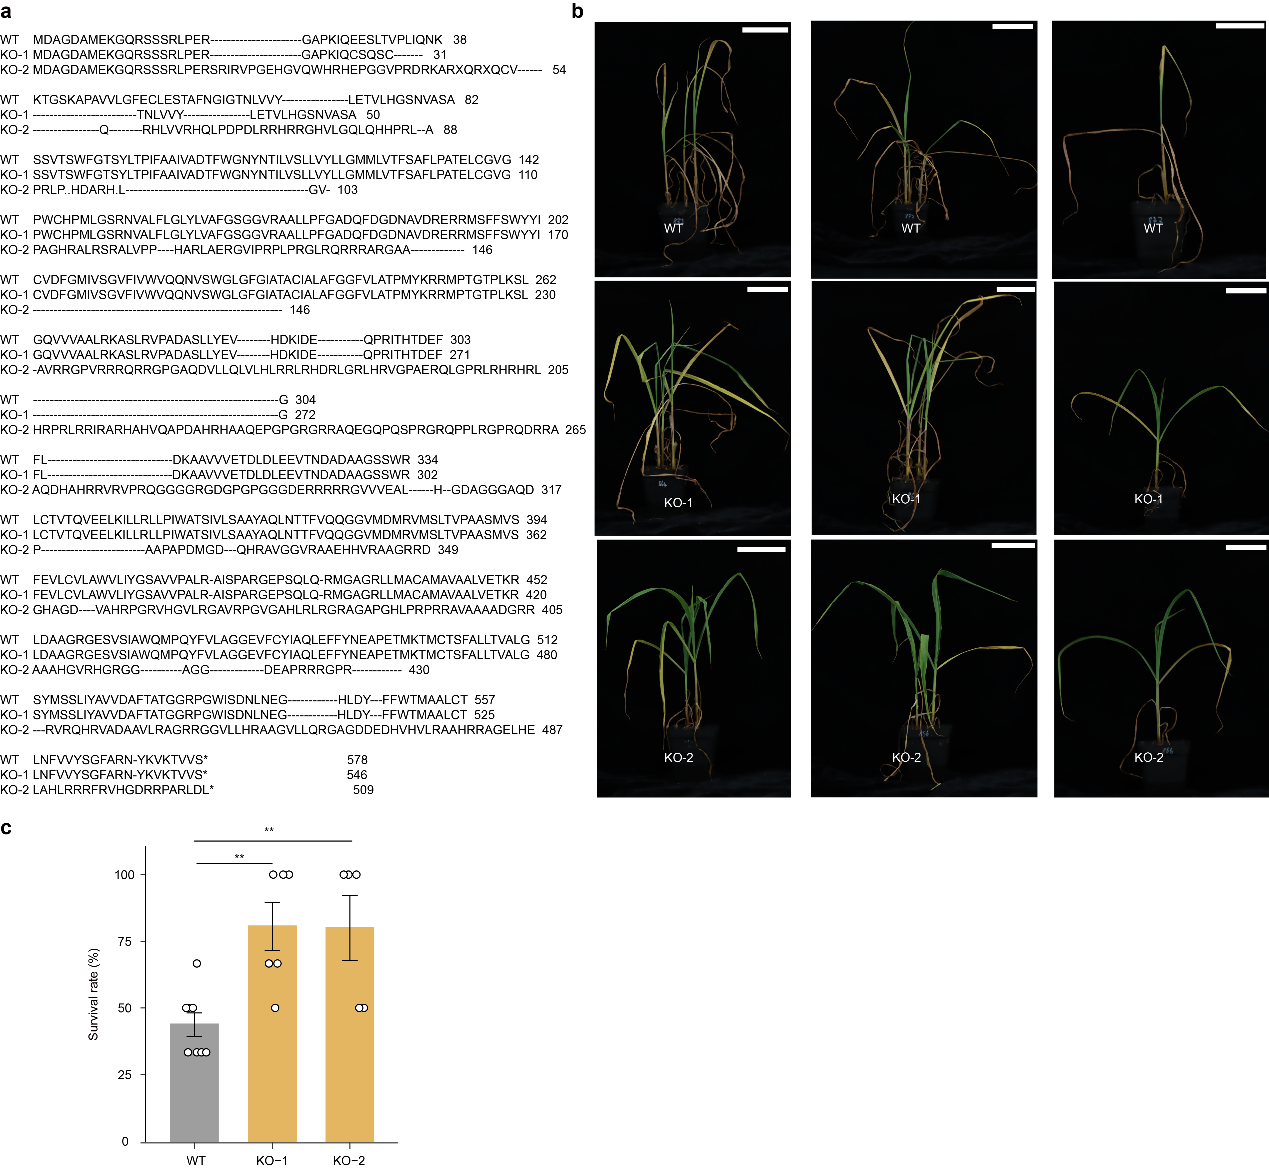


**Supplementary Fig. 4 Phenotypic analysis of *Zm00001d026221* knockout mutants under alkaline stress.** *Zm00001d026221* is the homolog gene of *OsNPF7.3* in maize. B104 was used as WT. Data represent mean ± s.d. (*n* ≥ 5). Asterisks indicate statistical significance by two-tailed Student’s *t*-tests (***p* < 0.01). Scale bar = 5 cm.
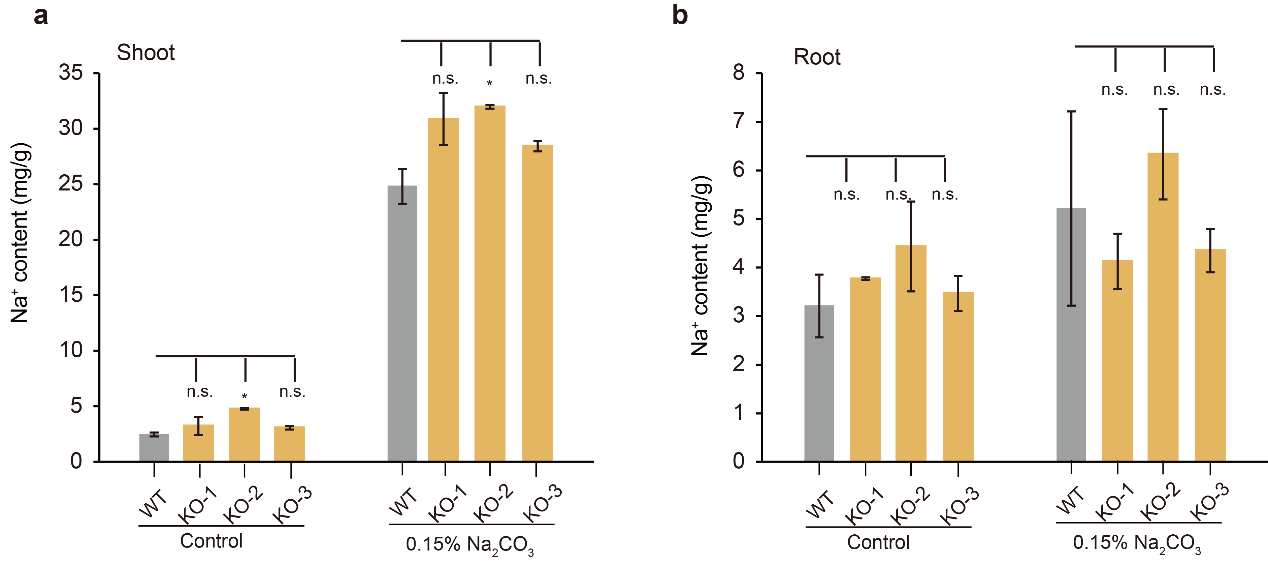


**Supplementary Fig. 5** **Na+ content in shoots and roots under control and alkaline stress conditions.** Data represent mean ± s.d. (*n* = 2). Asterisks indicate statistical significance by two-tailed Student’s *t*-tests (**p* < 0.05, n.s. indicates no significant difference).
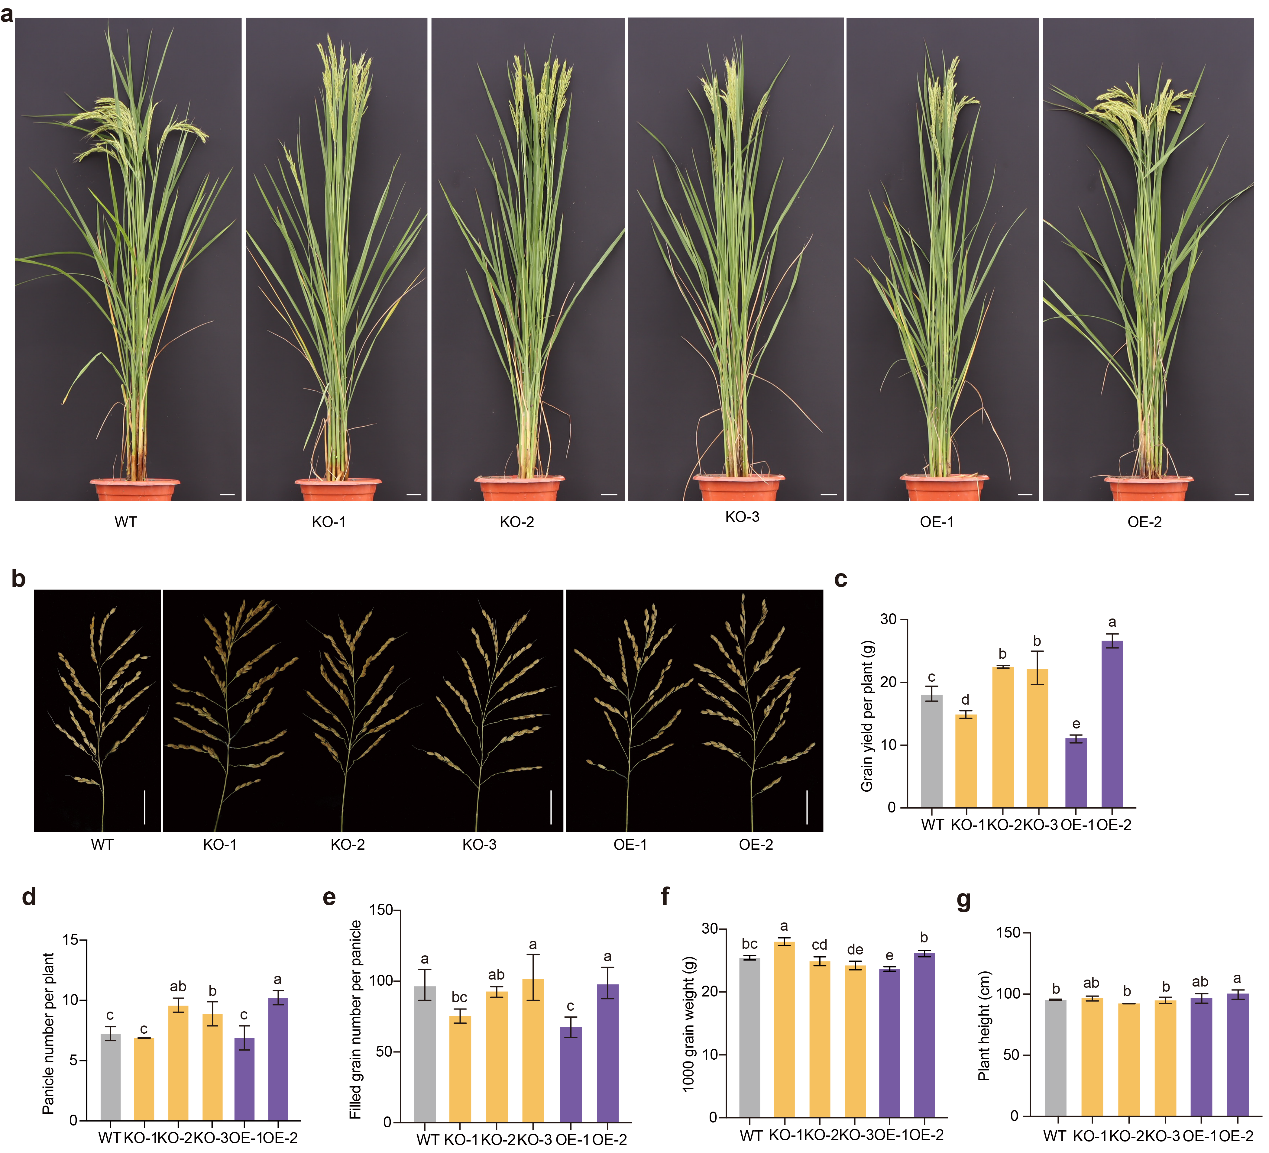


**Supplementary Fig. 6 Agronomic traits of WT and *OsNPF7.3* transgenic lines in normal paddy fields.**

**a** Whole plant morphology. **b** Main panicle morphology. **c** Grain yield per plant. **d** Panicle number per plant. **e** Filled grain number per panicle. **f** 1000 grain weight. **g** Plant height. Data represent mean ± s.d. (*n* = 3). Different letters represent significant differences at *p* < 0.05 based on Tukey’s HSD tests (n.s. indicates no significant difference). Scale bar = 5 cm.


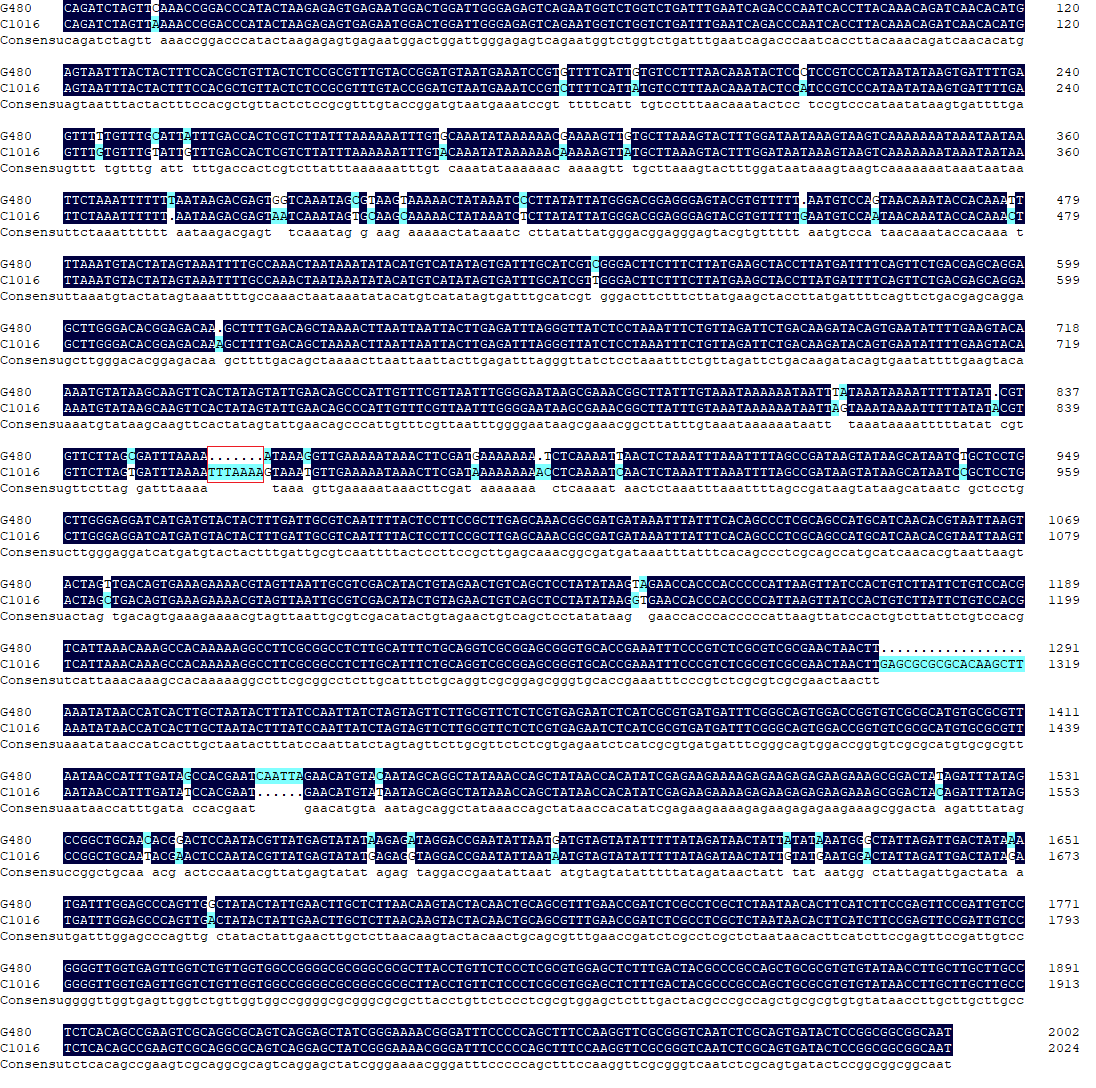


**Supplementary Fig. 7** **Promoter sequence comparison between the two haplotypes of *OsNPF7.3*.** G480 and C1016 belong to *OsNPF7.3Hap1*and *OsNPF7.3Hap2*, respectively.
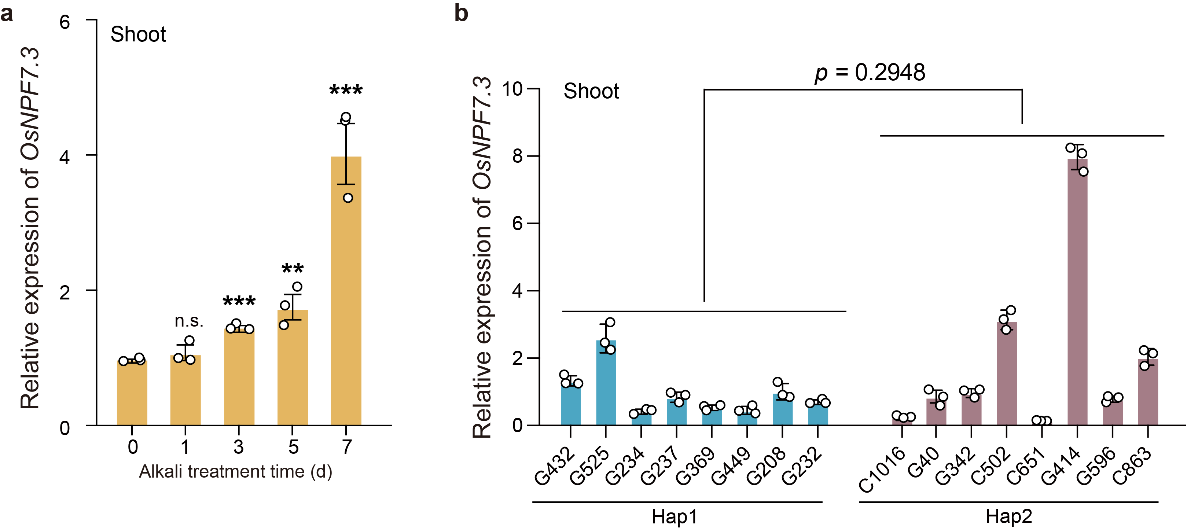


**Supplementary Fig. 8 Expressions profile of *OsNPF7.3* and its expression difference in shoots between the two haplotypes under alkaline stress. a** Expression pattern of *OsNPF7.3* in shoots of ZH11 at different time points under alkaline stress. **b** Expression levels of *OsNPF7.3* in shoots under alkaline stress in accessions carrying *OsNPF7.3Hap1* (blue)and *OsNPF7.3Hap2* (red). Data represent mean ± s.d. (*n* = 3). Asterisks indicate statistical significance by two-tailed Student’s *t*-tests (***p* < 0.01, ****p* < 0.001, and n.s. indicates no significant difference).
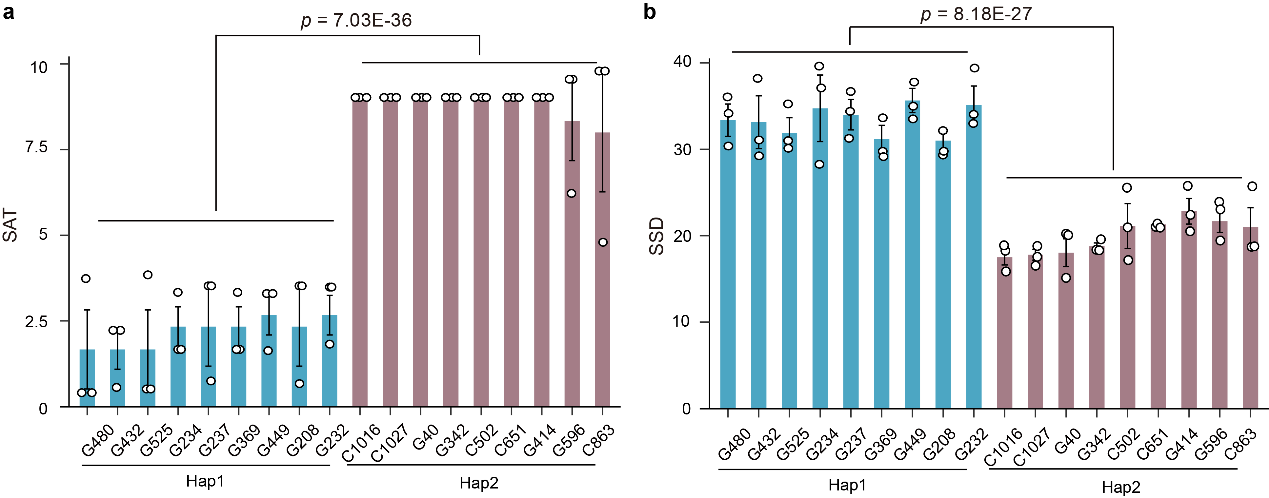


**Supplementary Fig. 9 SAT and SSD of accessions carrying *OsNPF7.3Hap1* and *OsNPF7.3Hap2*** **under alkaline stress conditions. a** SAT. **b** SSD. Data represent mean ± s.d. Statistical significance was calculated by two-tailed Student’s *t*-tests.
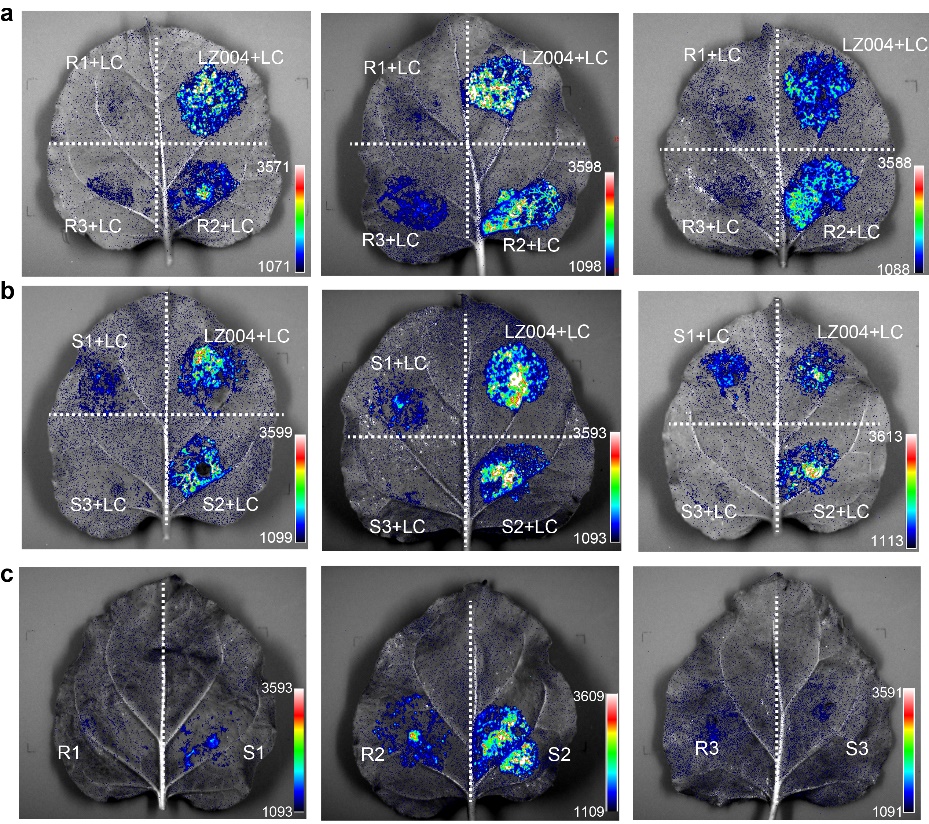


**Supplementary Fig. 10 Biological replicates of dual-luciferase assay for three fragments of the *OsNPF7.3* promoter.**
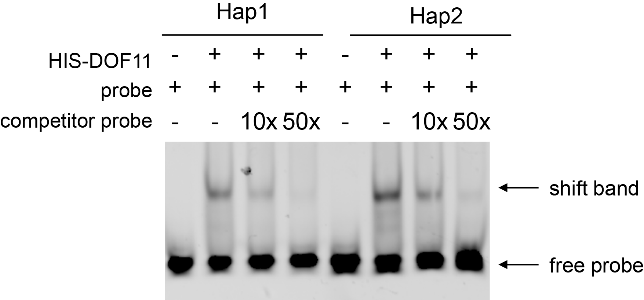


**Supplementary Fig. 11** **EMSA verification of the binding of recombinant HIS-TF-DOF11 protein to theP2 fragment of *OsNPF7.3Hap1* and *OsNPF7.3Hap2*.** The probe fragment was labeled with Cy5, covering the sequence of the DOF box.
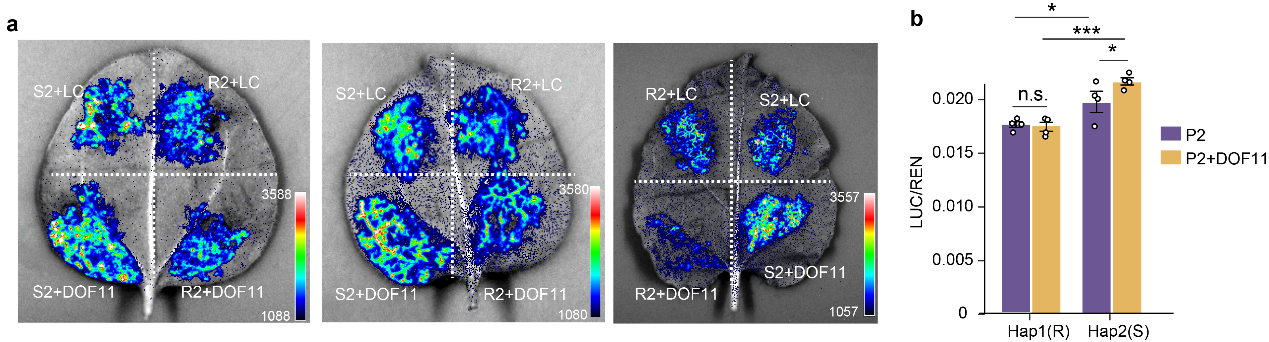


**Supplementary Fig. 12 Biological replicates of the regulatory effect of OsDOF11 on theP2 fragment ofthe *OsNPF7.3* promoter. a** Transactivation of the *OsNPF7.3*-P2 transcription activity by OsDOF11 in *N. benthamiana* leaves. **b** Statistical analysis of the results shown in **a**. Data represent mean ± s.d. (*n* = 4). Asterisks indicate statistical significance by two-tailed Student’s *t*-tests (**p* < 0.05, ****p* < 0.001, and n.s. indicates no significant difference).
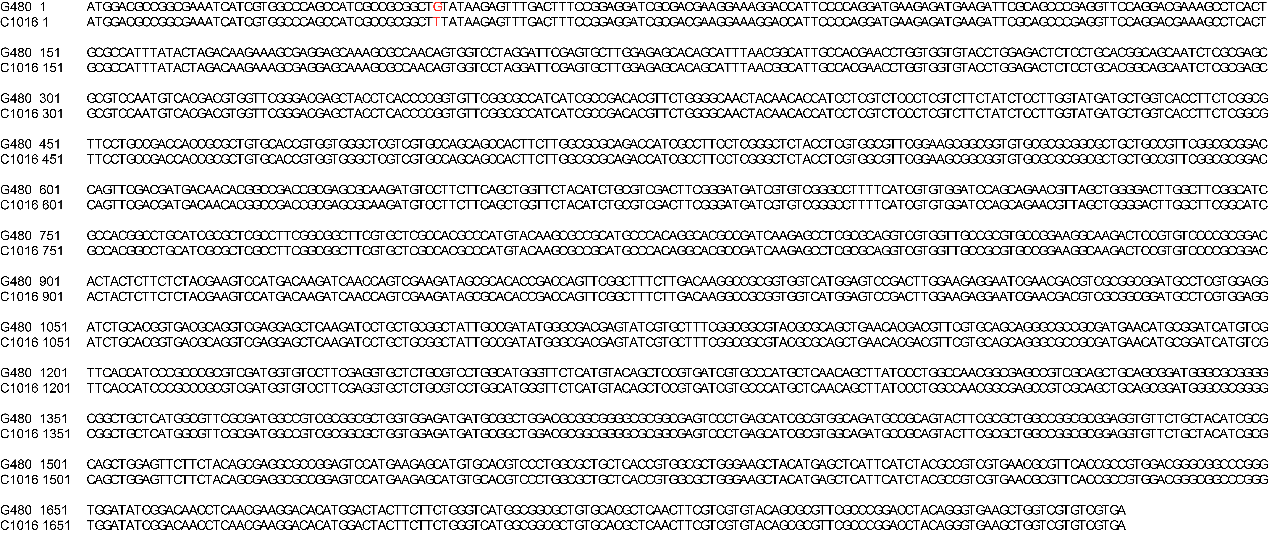


**Supplementary Fig. 13** **Sequence comparison of the *OsNPF7.3* CDS region between alkali-tolerant haplotype (G480) and alkali-sensitive haplotype (C1016) accessions.**
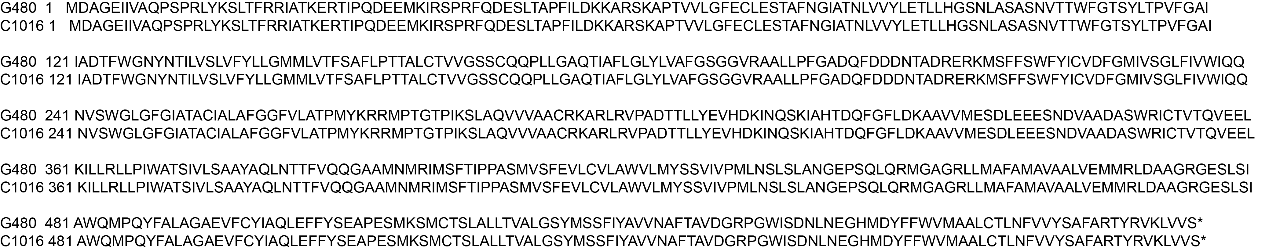


**Supplementary Fig. 14** **Amino acid sequence comparison of OsNPF7.3between alkali-tolerant haplotype (G480) and alkali-sensitive haplotype (C1016) accessions.**
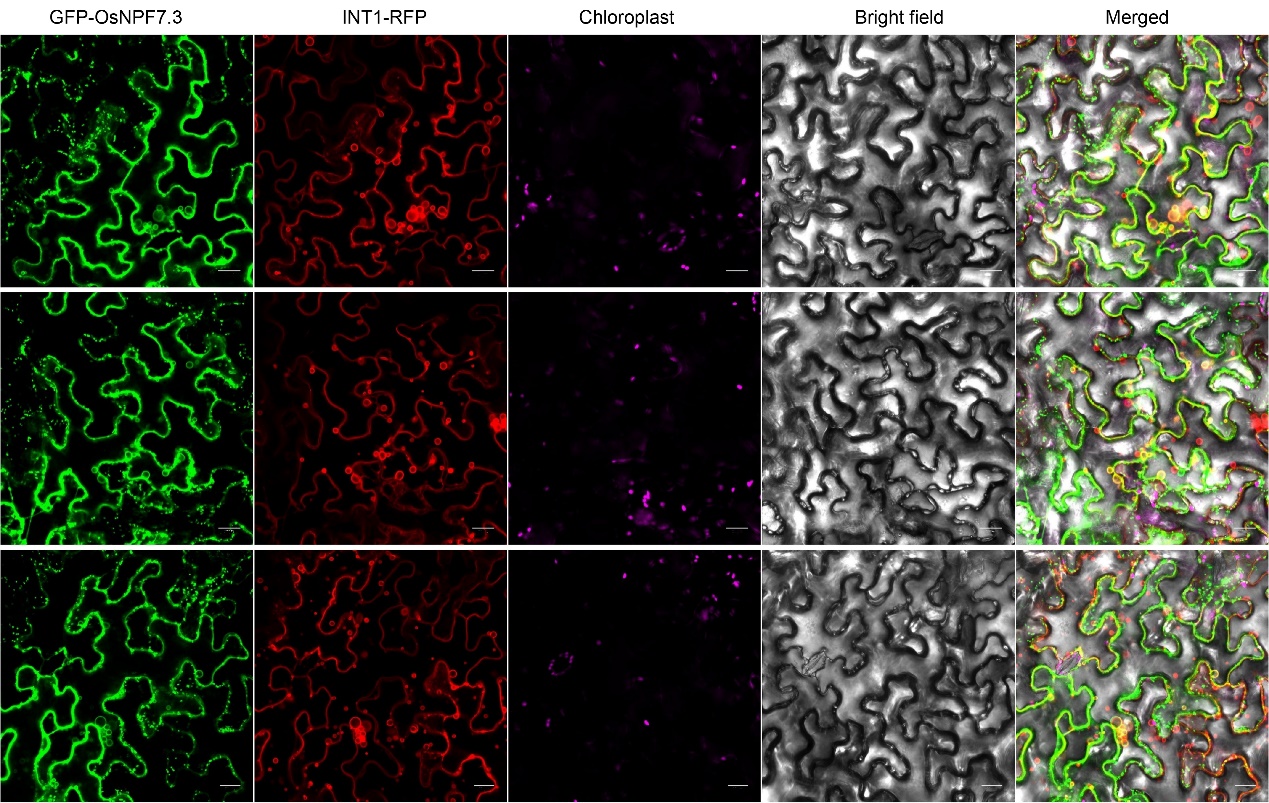


**Supplementary Fig. 15 Biological replicates of the colocalization analysis between OsNPF7.3 and the vacuole membrane marker protein INT1 in *N. benthamiana* leaves.** Scale bar = 20 μm.
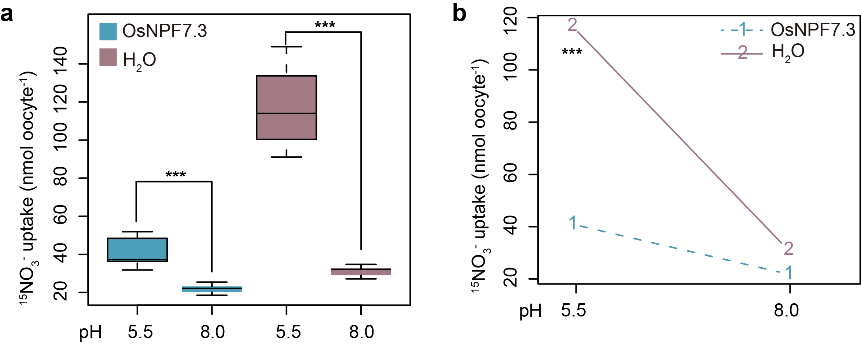


**Supplementary Fig. 16** **Nitrate absorption analysis of OsNPF7.3 expressed in *Xenopus laevis* oocytes.**
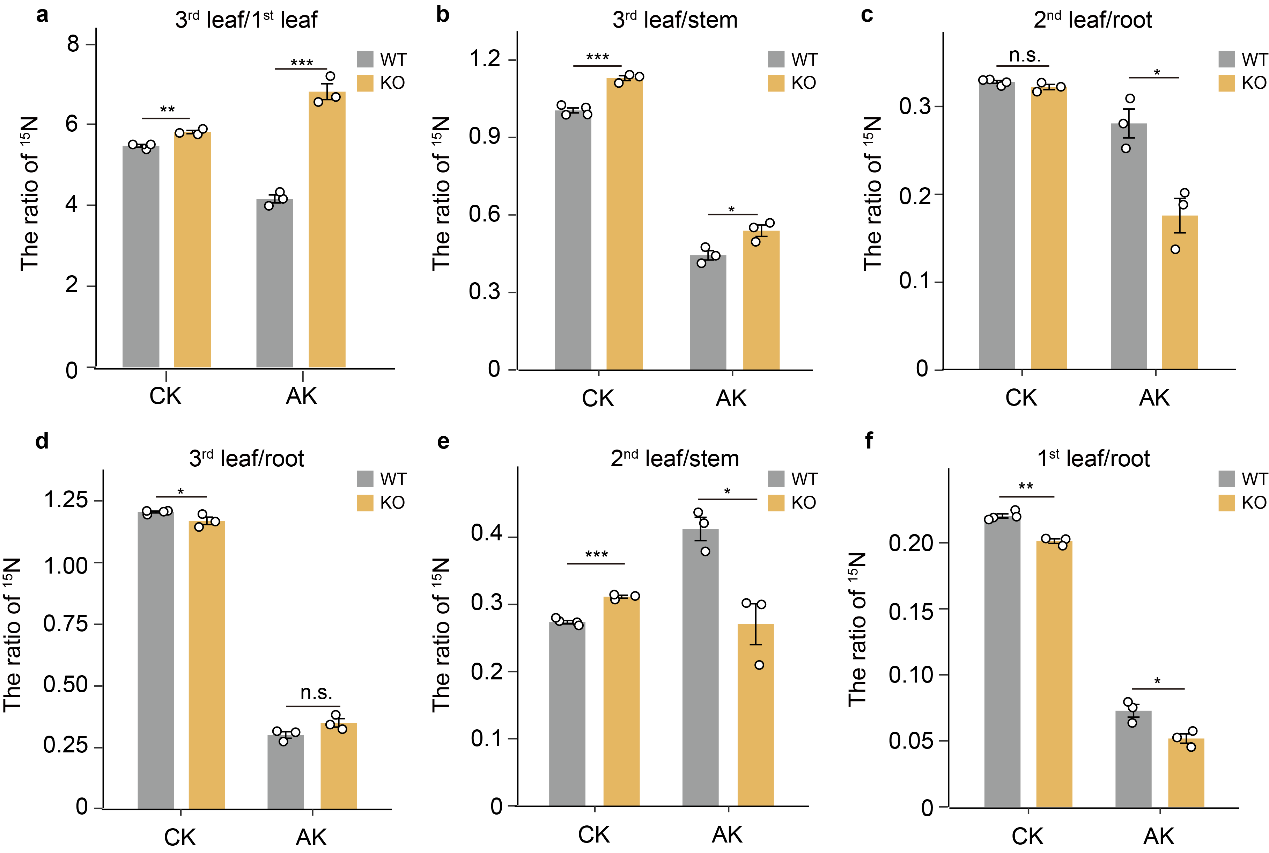


**Supplementary Fig. 17** **15N ratios in different organs under control and alkaline stress conditions**. **a-f** The ratio of 15N content in 3rd leaf and 1st leaf (**a**), in 3rd lead and stem (**b**), in 2nd leaf and root (**c**), 3rd lead and root (**d**), 2nd lead and stem (**e**), and in 1st leaf and root (**f**). Data represent mean ± s.d. (*n* ≥ 3). Asterisks indicate statistical significance by two-tailed Student’s *t*-tests (**p* < 0.05, ***p* < 0.01 and ****p* < 0.001, n.s. indicates no significant difference).
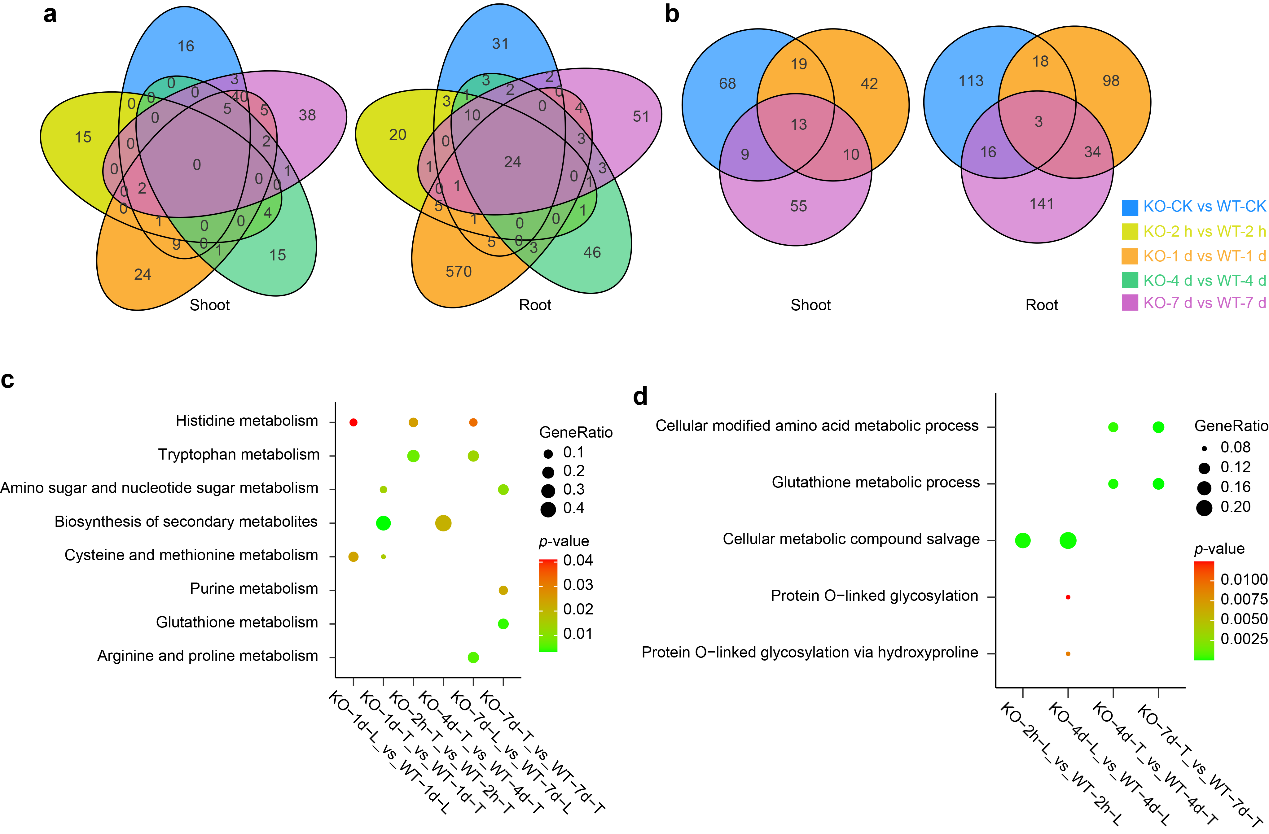


**Supplementary Fig. 18 Transcriptome and metabolome analysis of *OsNPF7.3*-dependent genes associated with alkaline stress in rice. a, b** Venn diagrams of DEGs (**a**) and DEMs (**b**) between *OsNPF7.3* knockout mutant (KO) and WT (ZH11) under control and alkaline stress conditions. **c, d** KEGG pathway (**c**) and GO (**d**)enrichment analyses of DEGs.


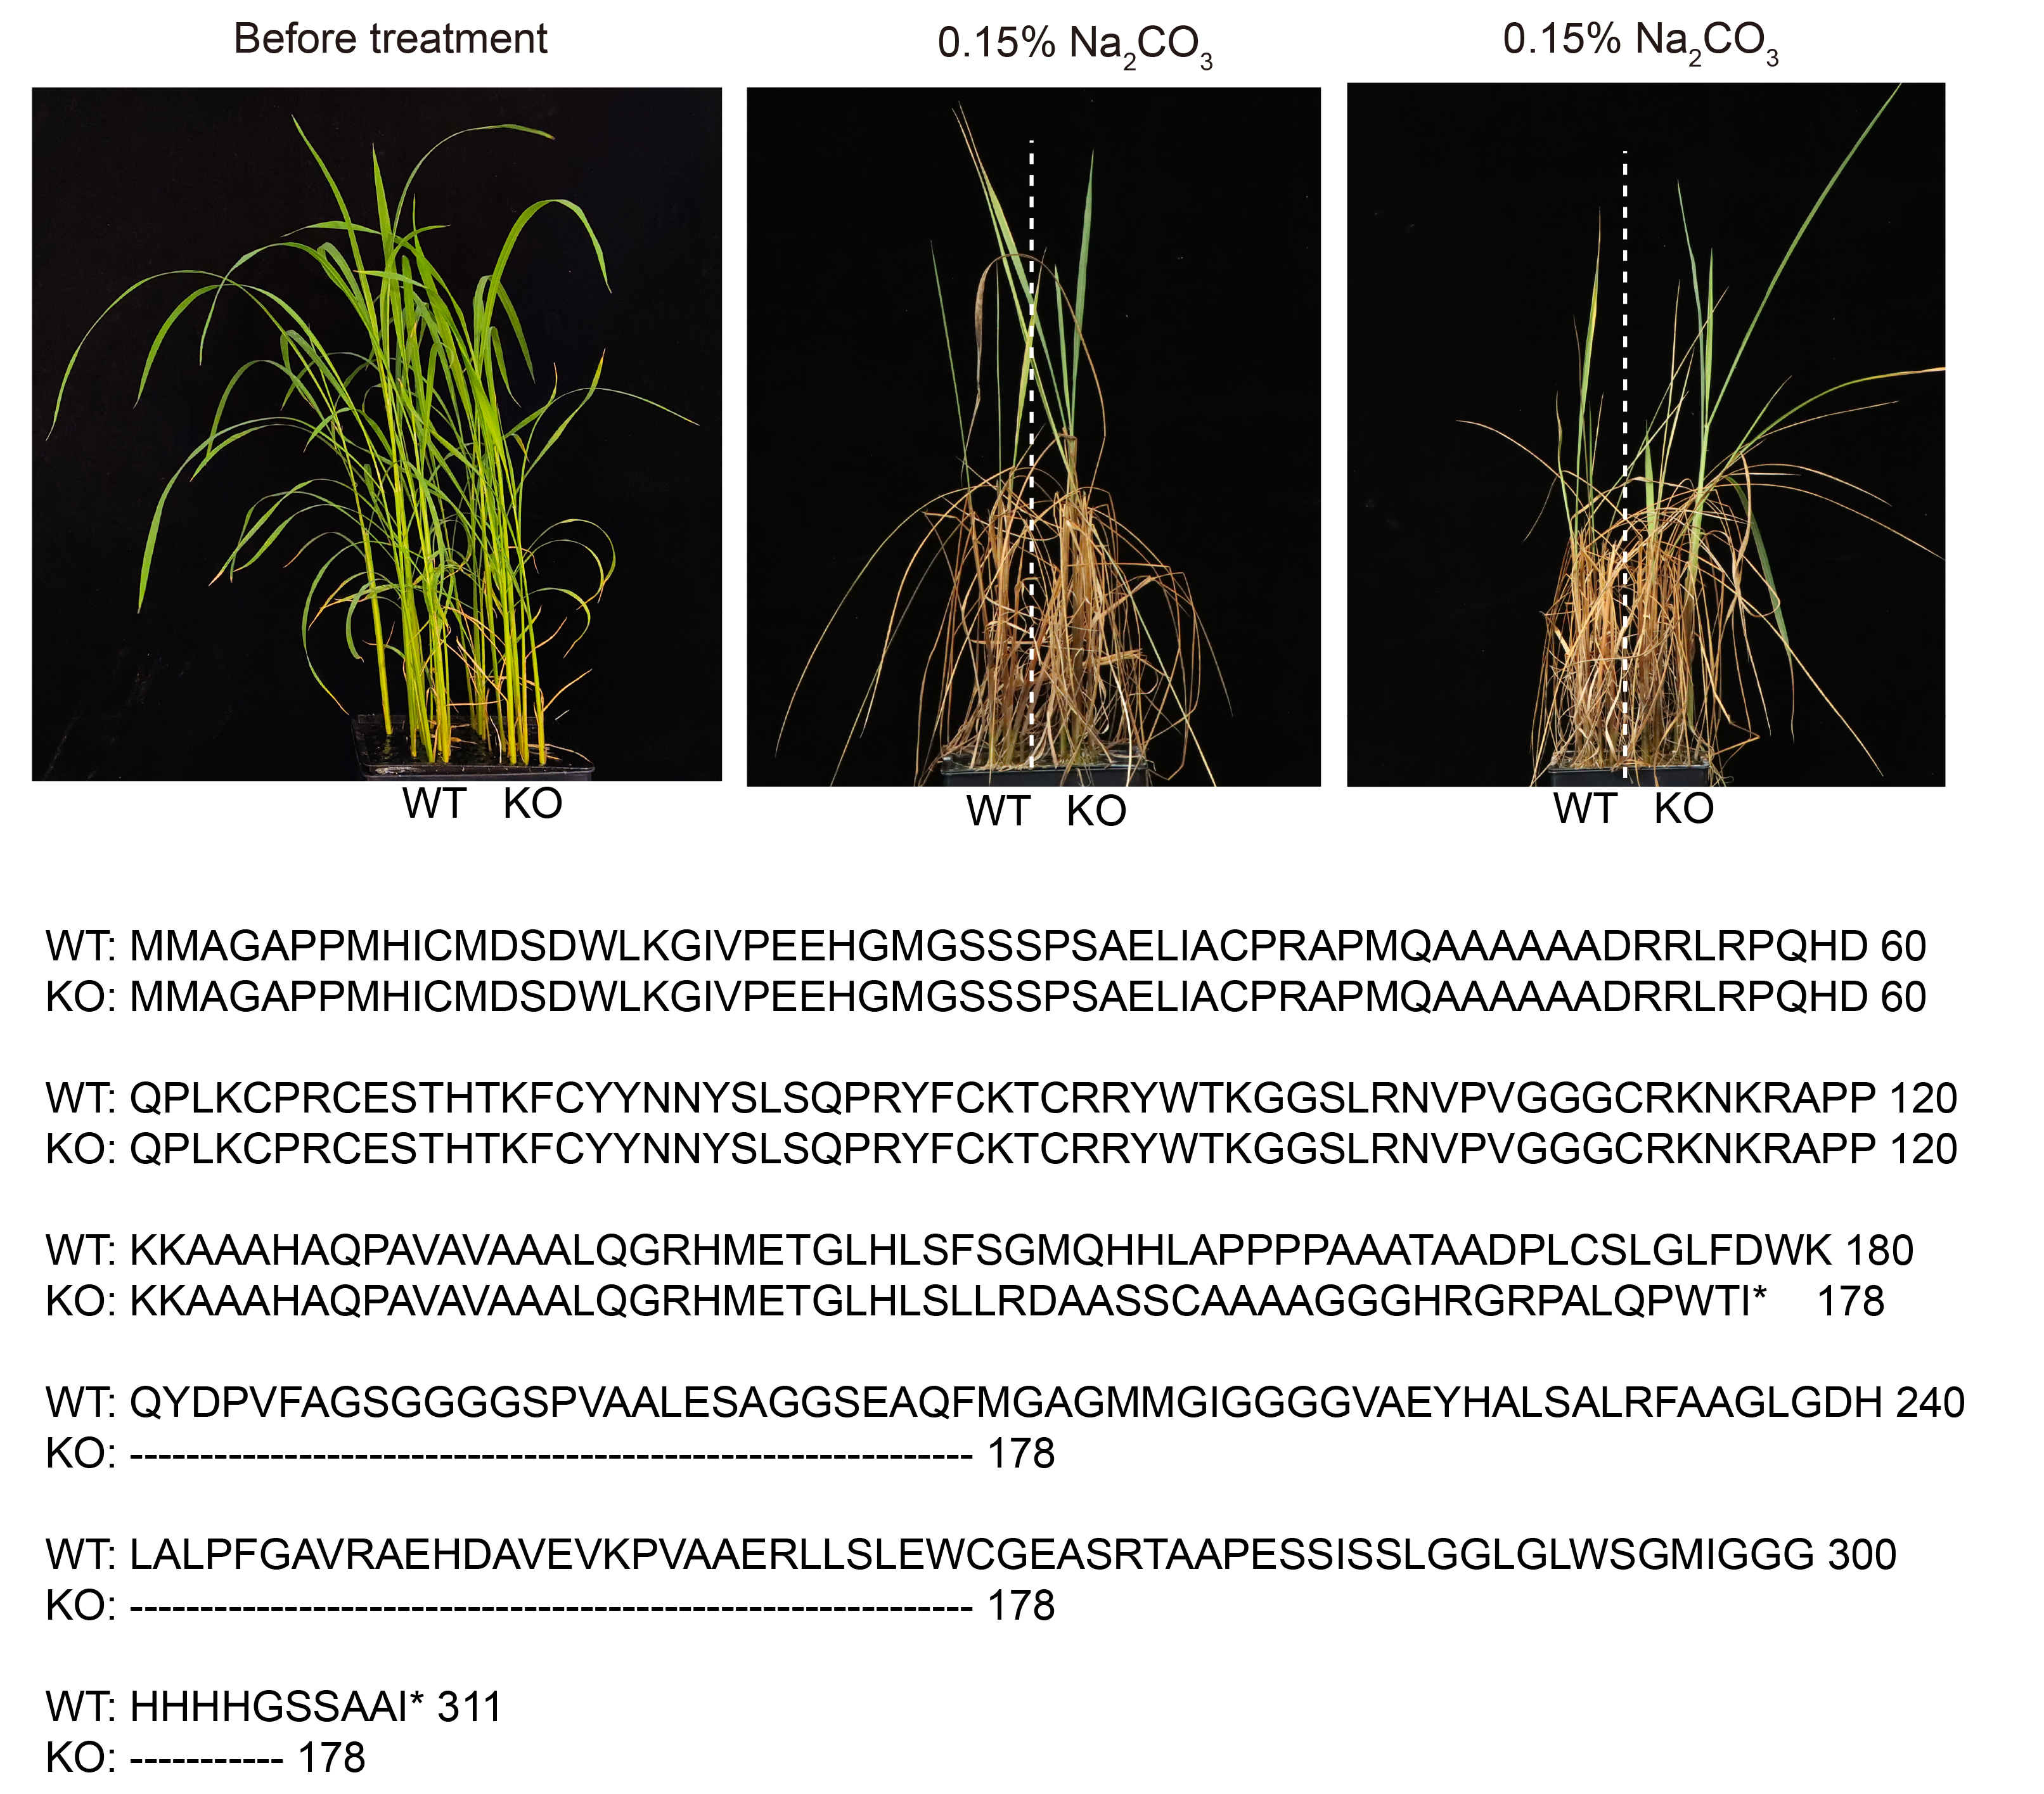


**Supplementary Fig. 19 Phenotypic analysis of *OsDOF11* knockout mutants under alkaline stress.**
